# Supplementary material for: Neutrophils insert elastase into hepatocytes to regulate calcium signaling in alcohol-associated hepatitis
Source: JCI journal article supplement (doi:10.1172/jci171691), 2024-06-25

# Full unedited blot for Figure 1K

6/6

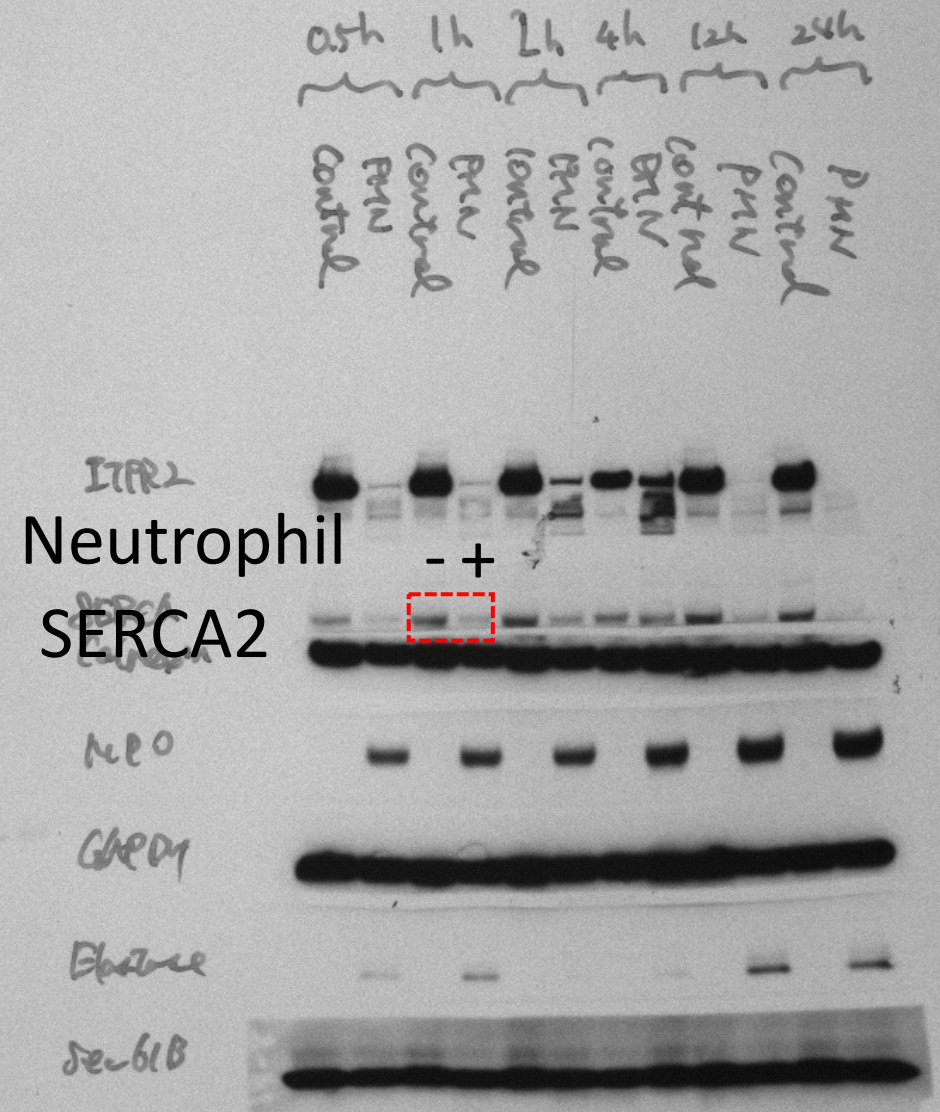

Full unedited blot for Figure 1K

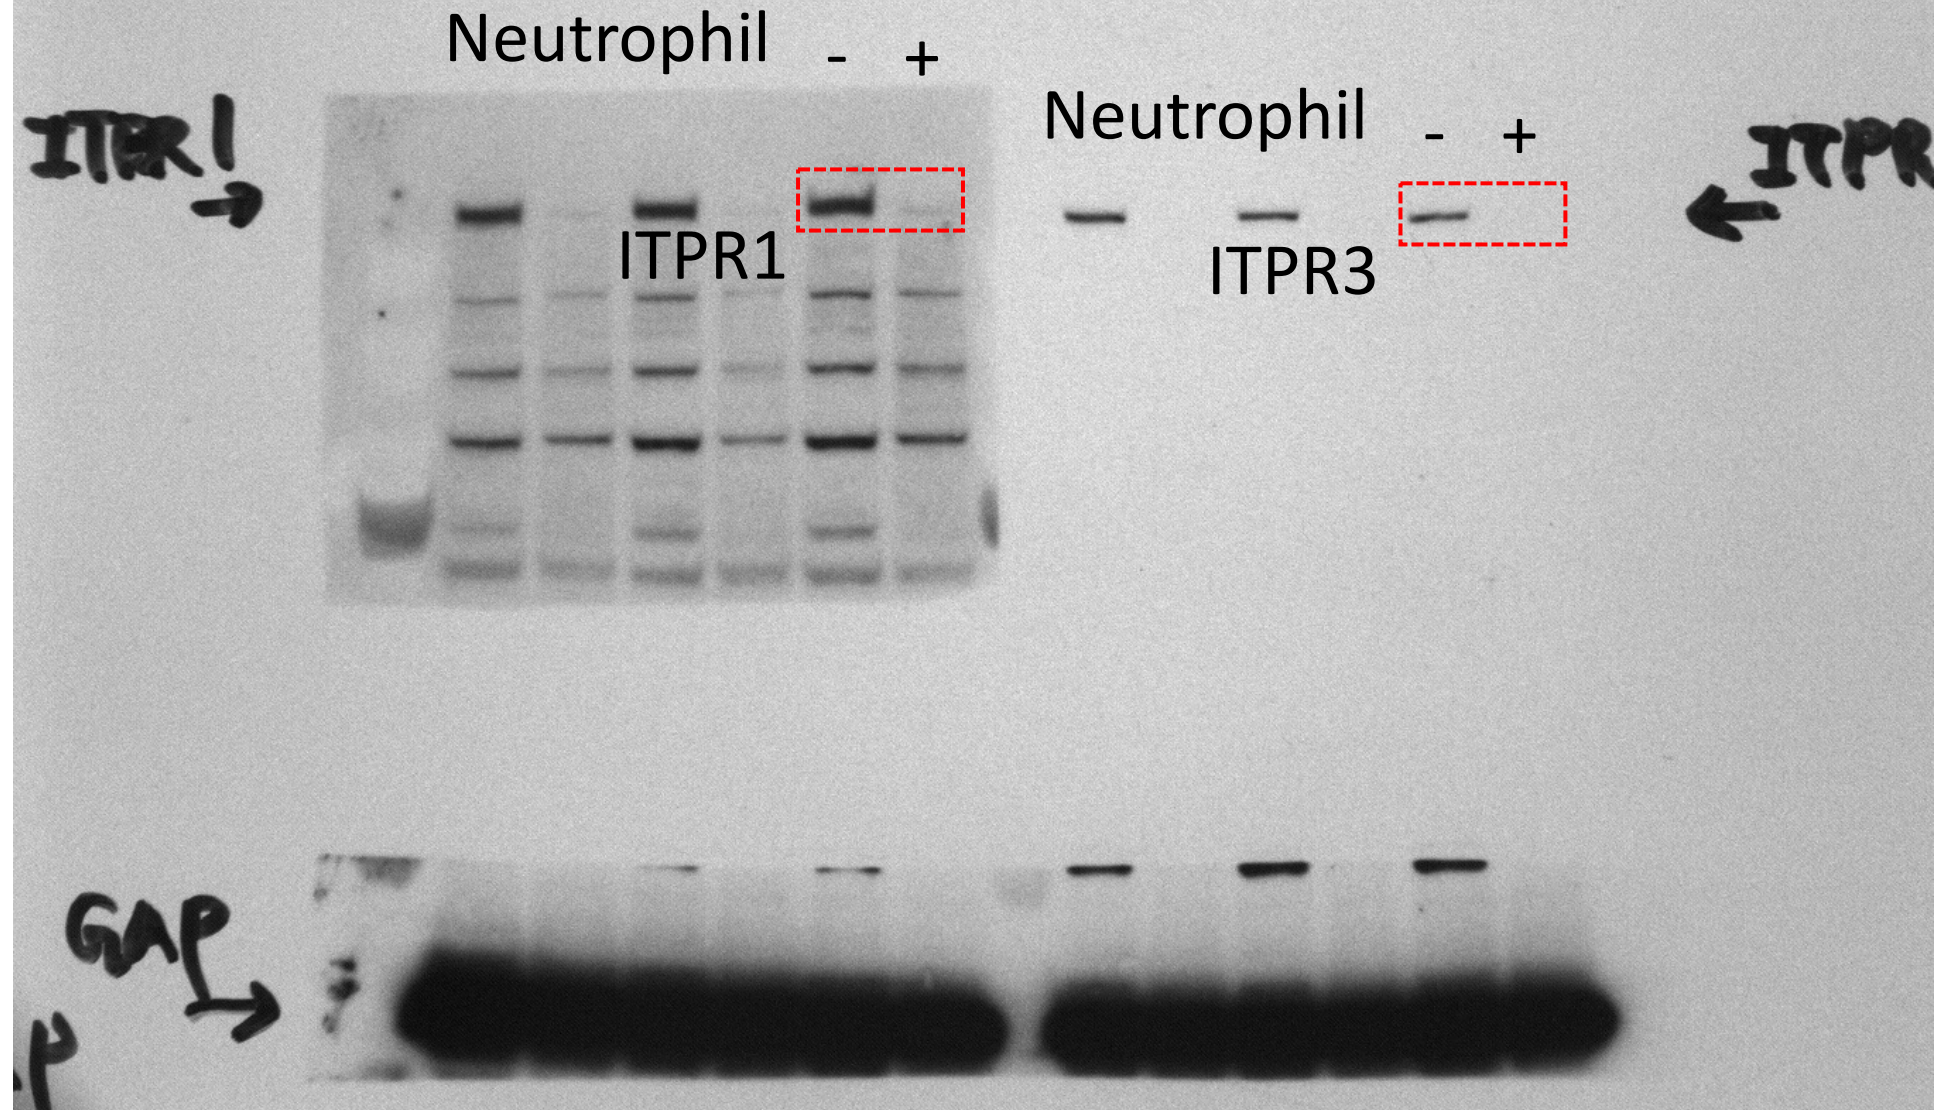

# Full unedited blot for Figure 1M

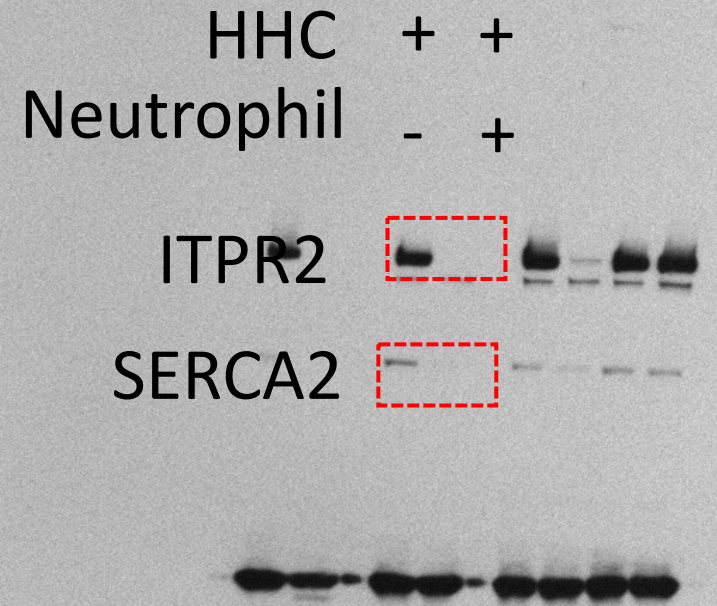

Full unedited blot for Figure 1M

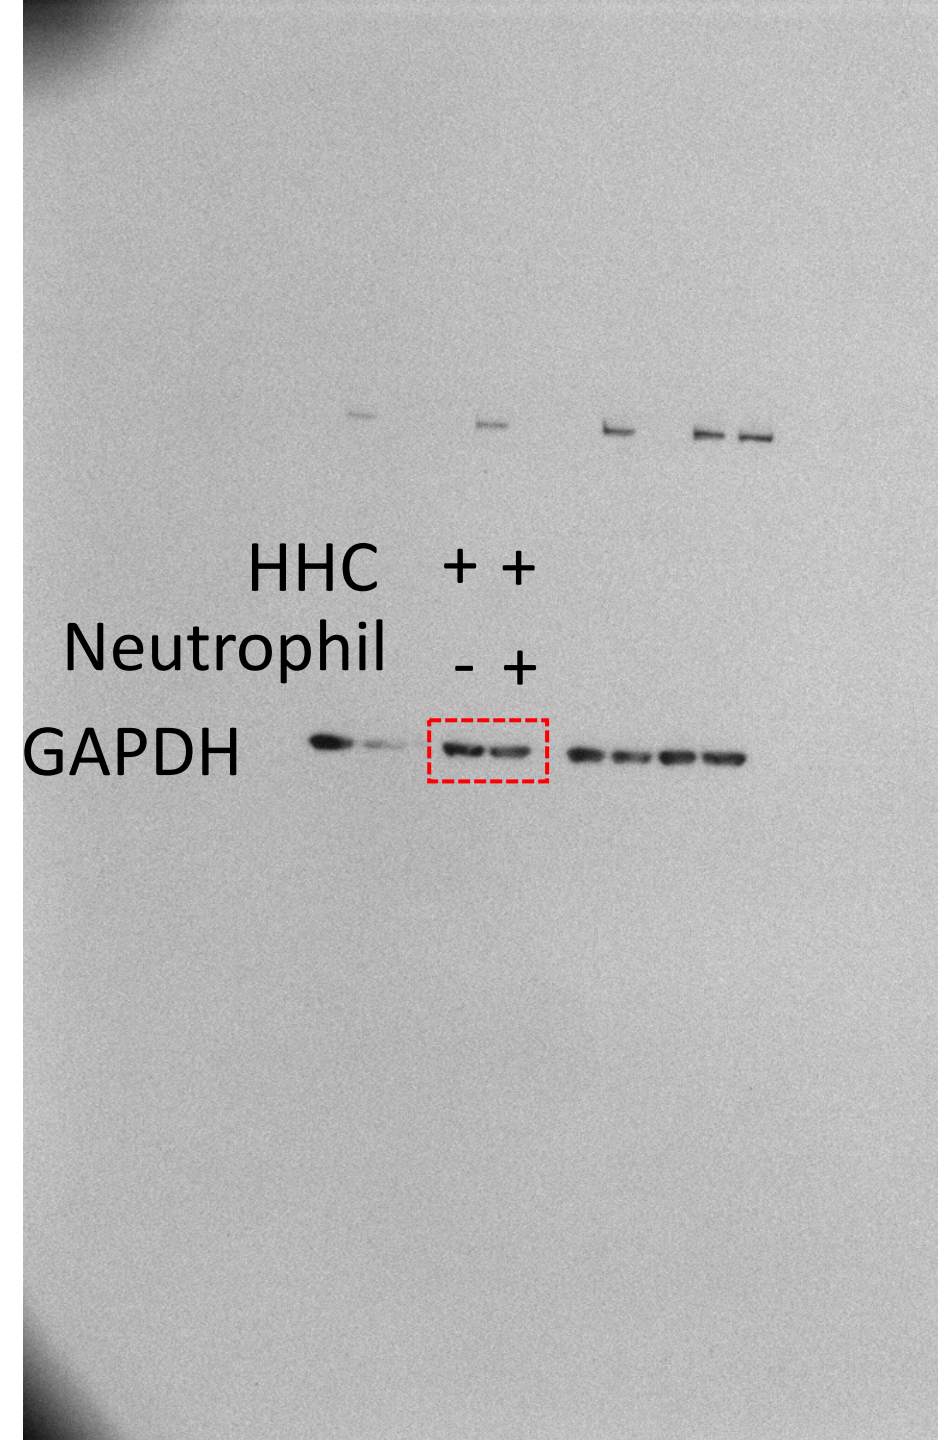

Full unedited blot for Figure S1B

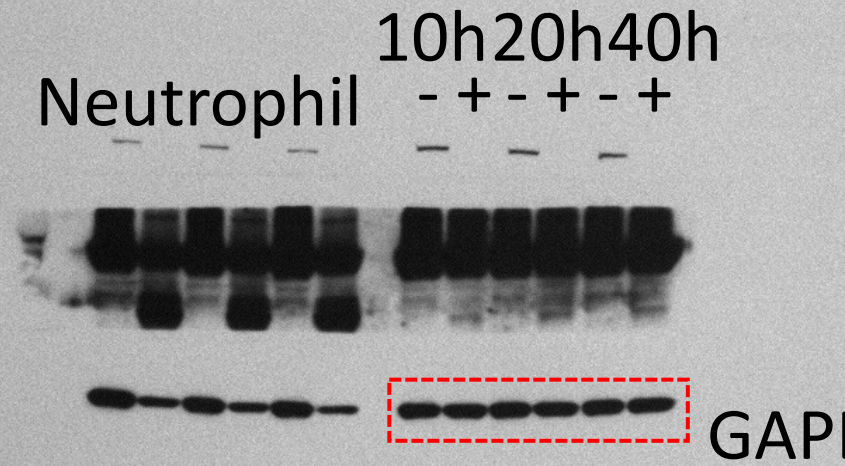

# Full unedited blot for Figure S1B

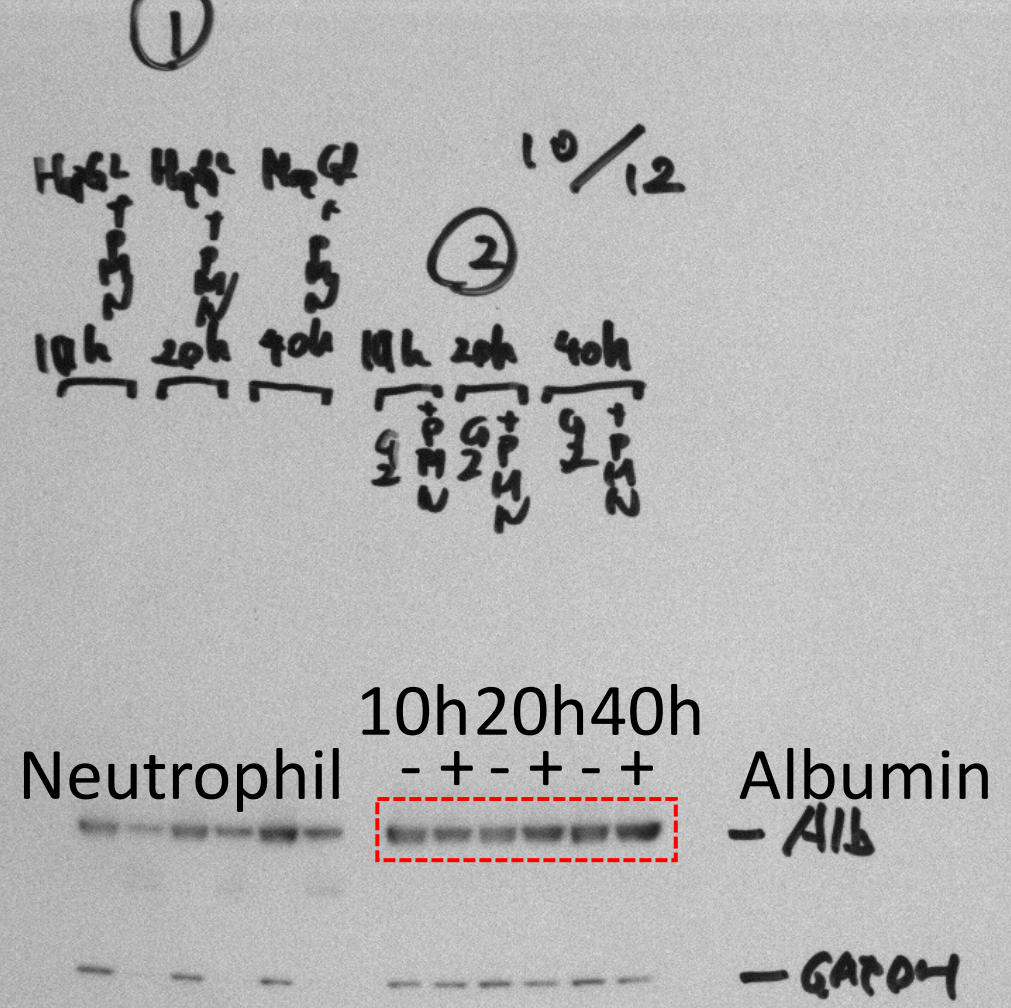

Full unedited blot for Figure S1H

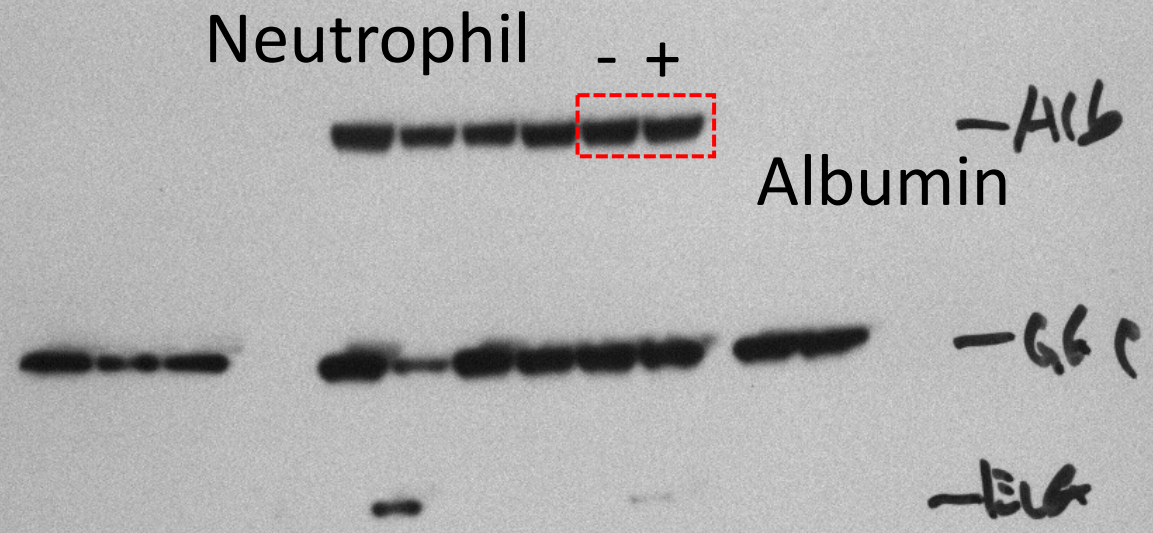



Full unedited blot for Figure S1H

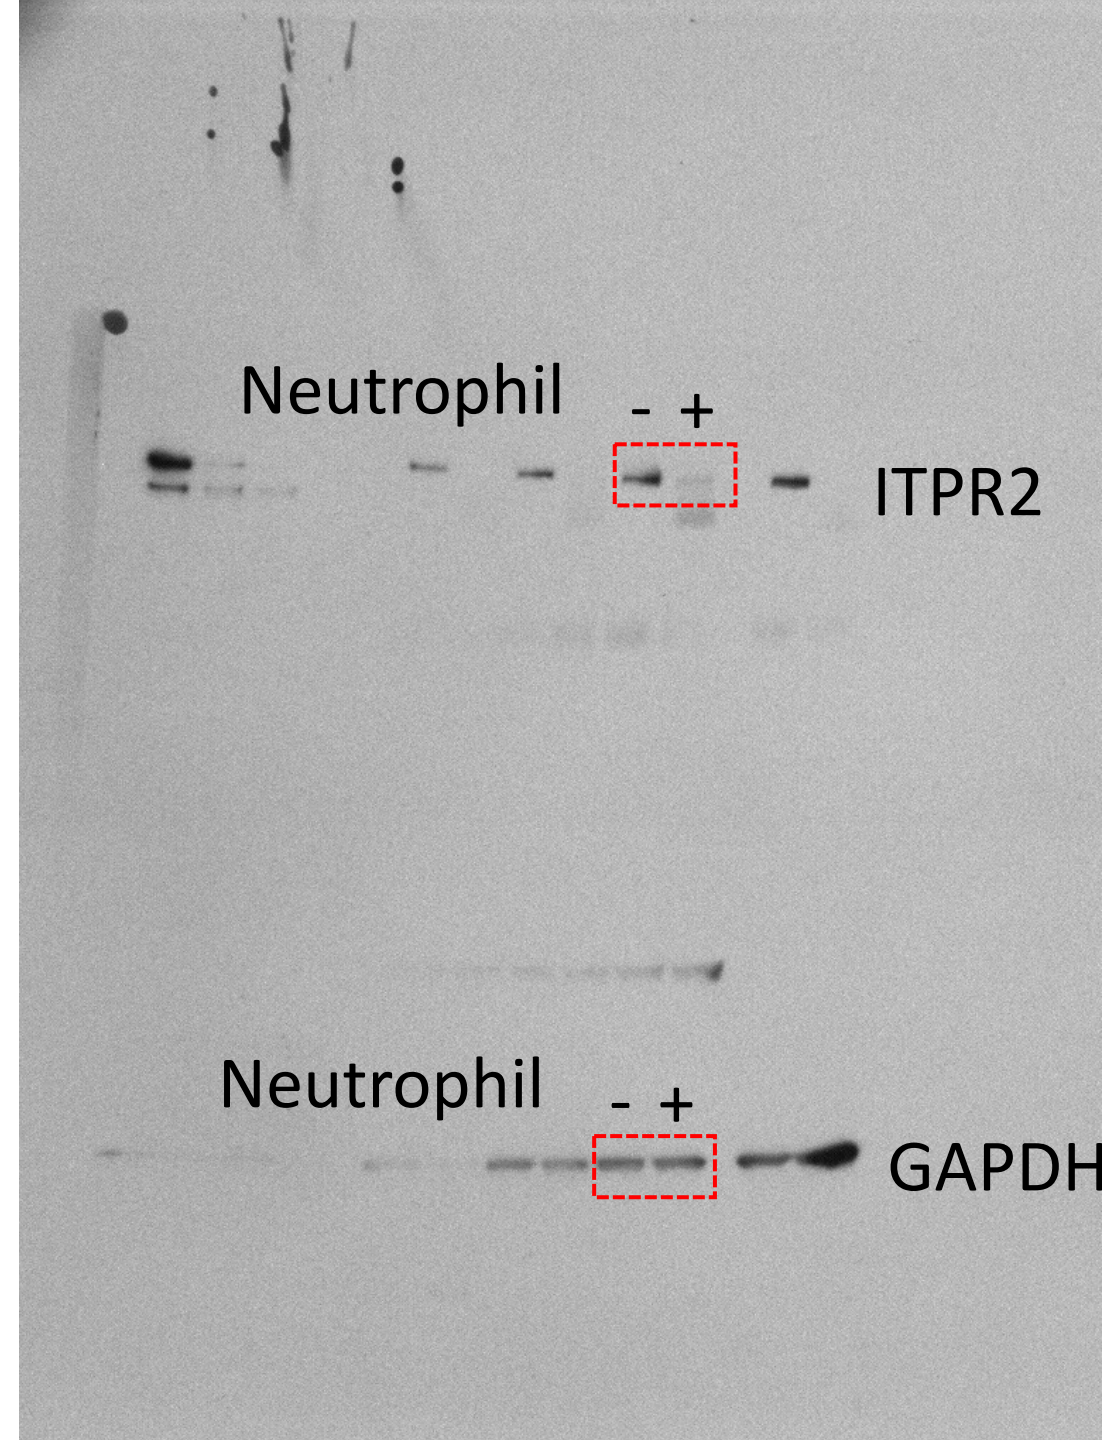

# Full unedited blot for Figure 2A

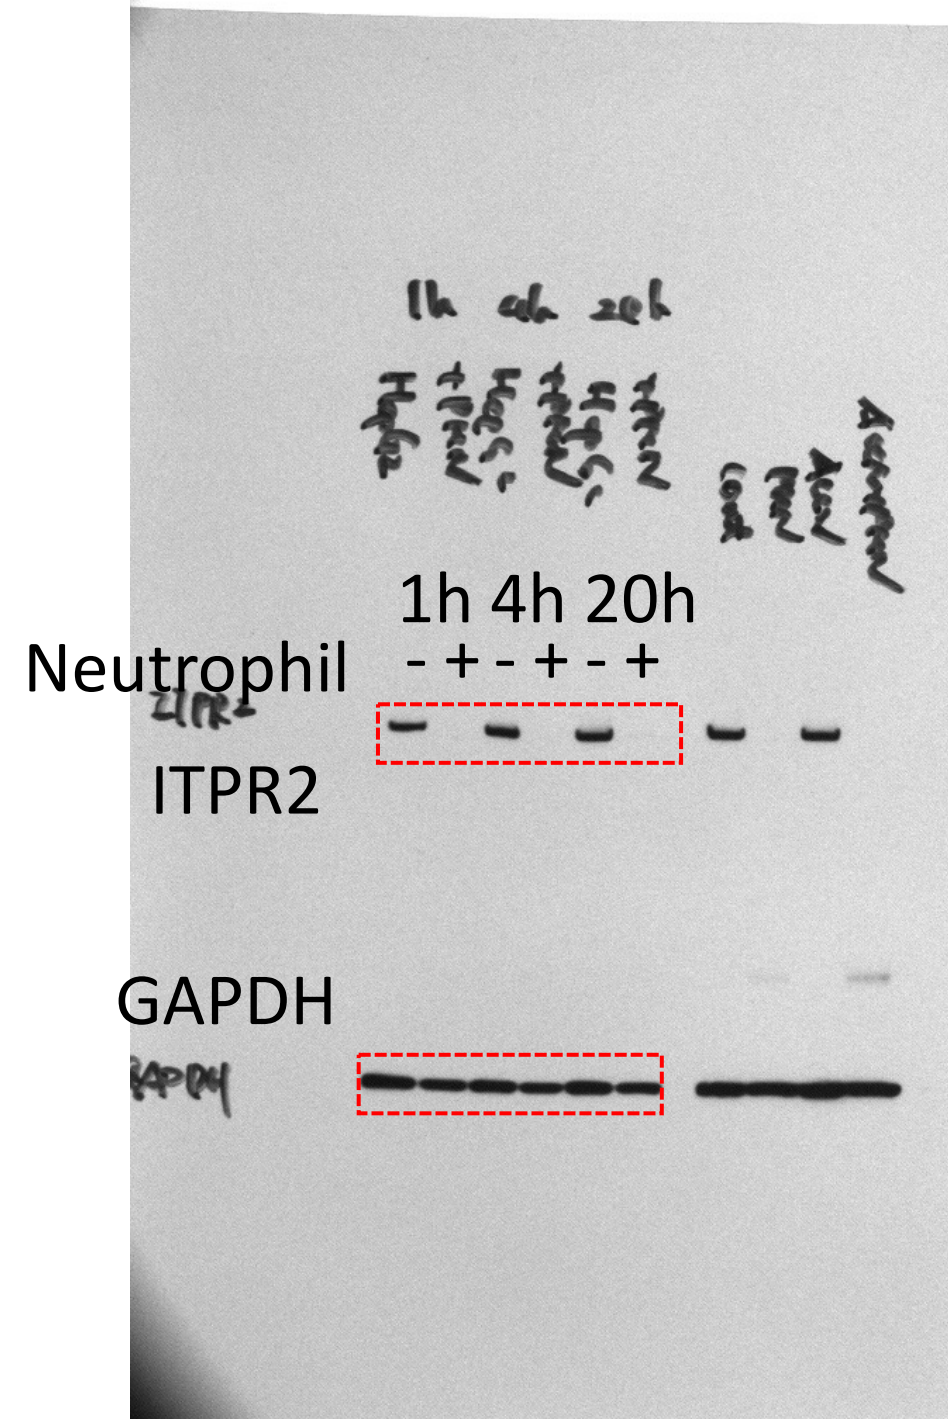



# Full unedited blot for Figure 2E

- ① HepG2
- ② + Neutrophil
- ③ Neutrophil removed

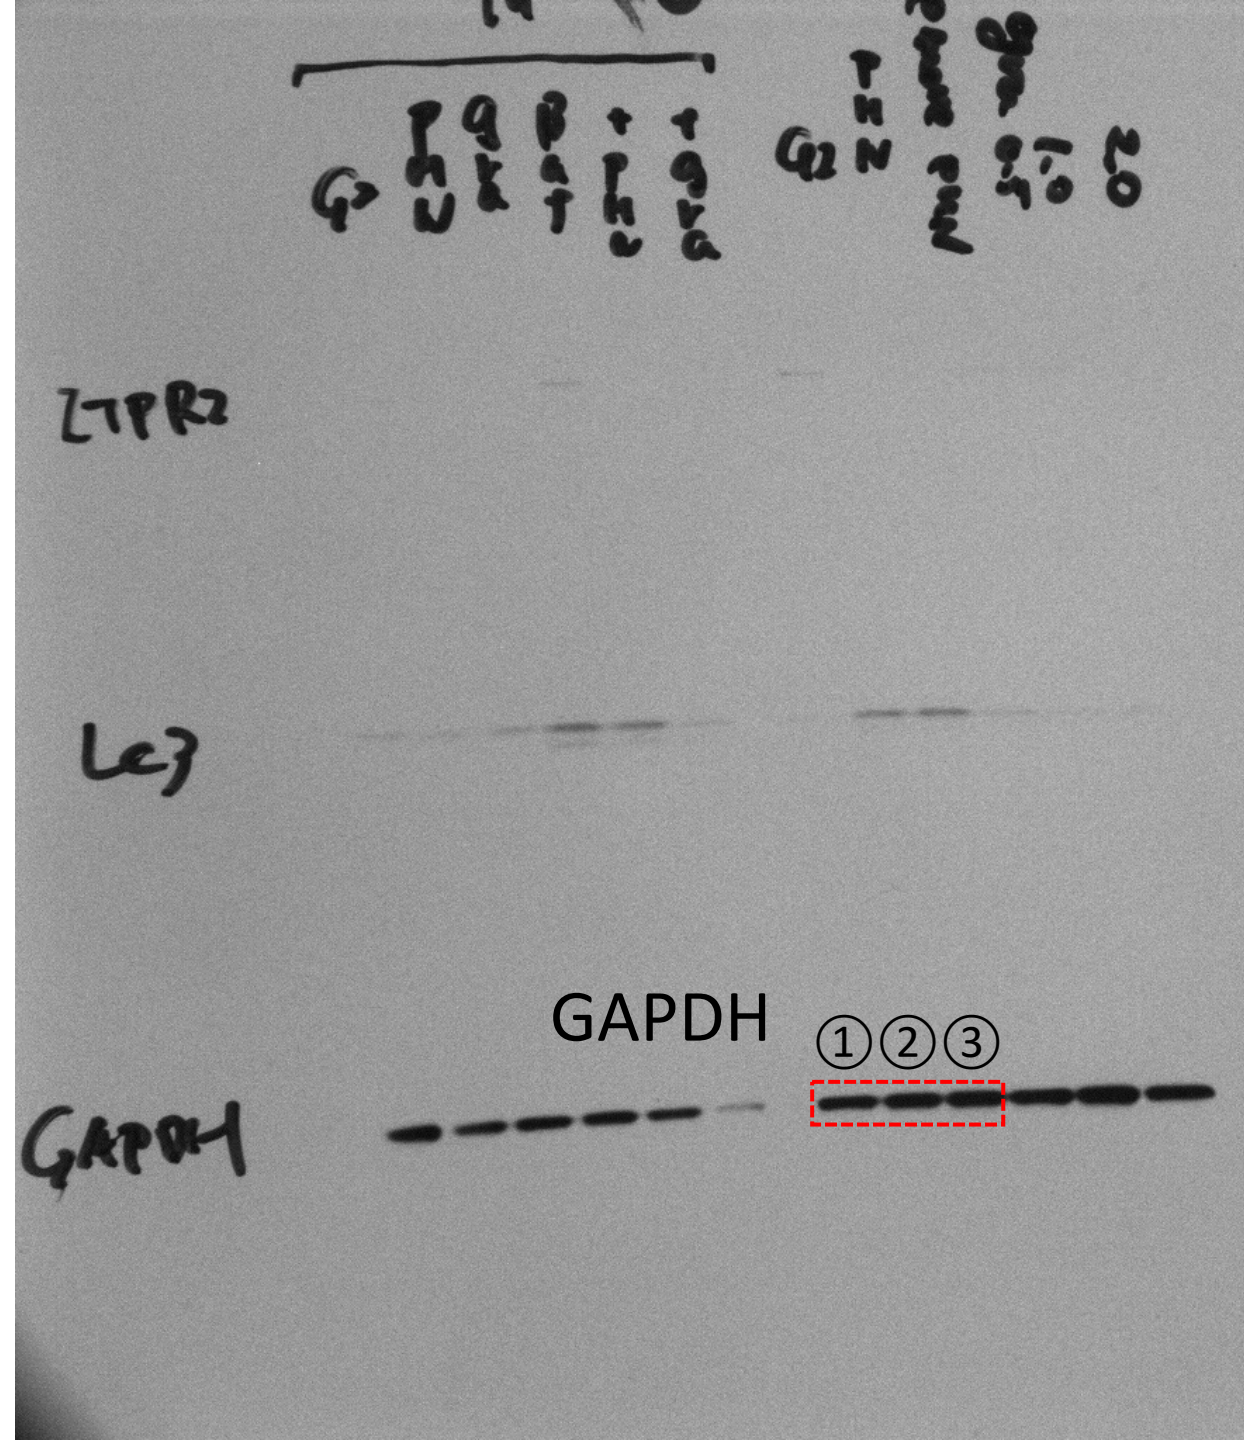

# Full unedited blot for Figure 2H

- ① + MG132
- ② + Baf
- ③ + ALLN

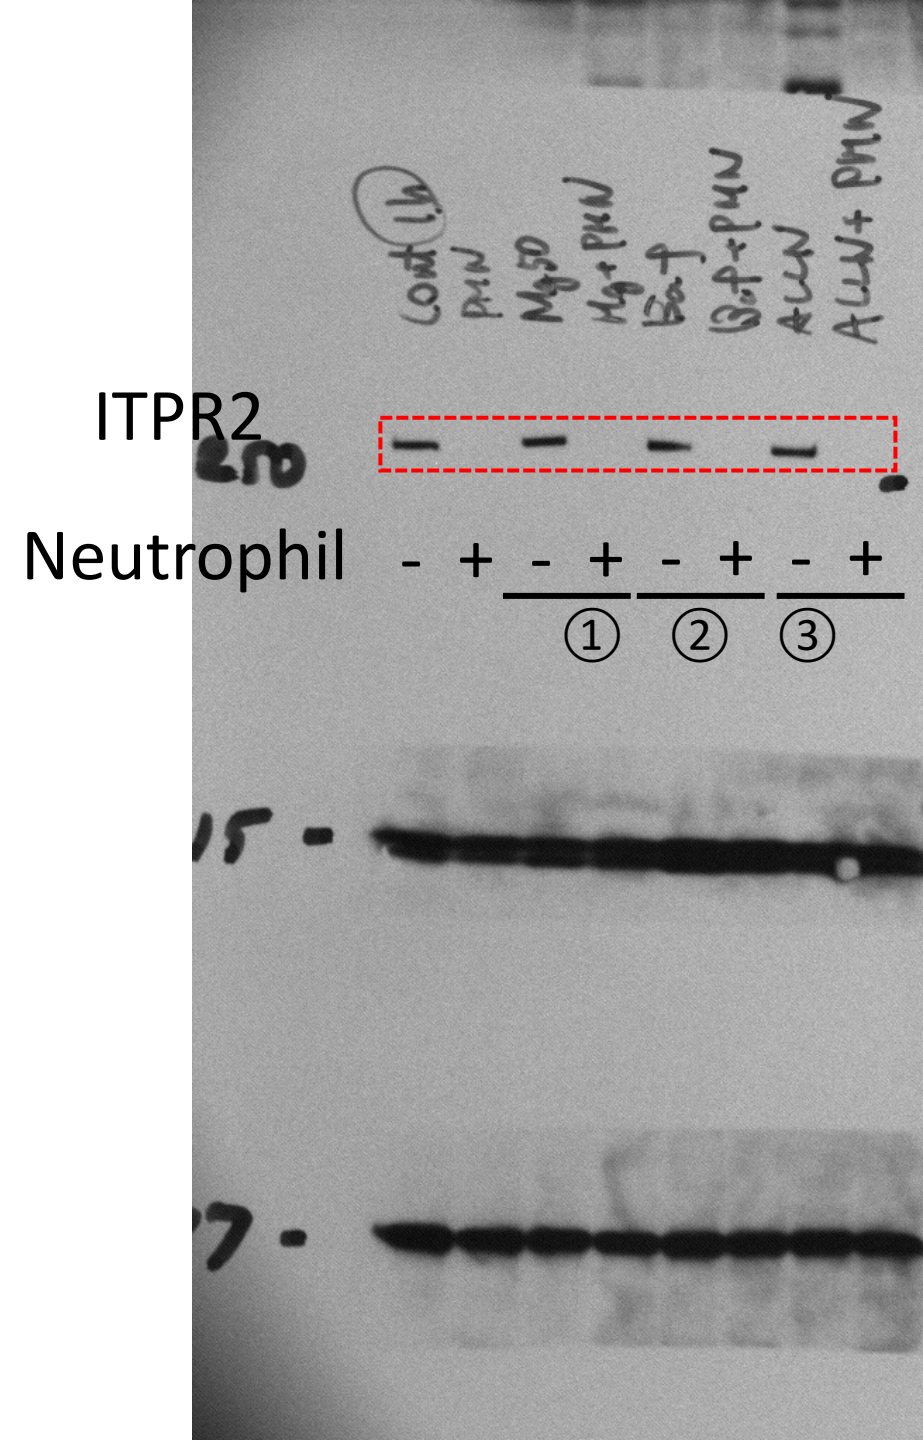

# Full unedited blot for Figure 2H

- ① + MG132
- ② + Baf
- ③ + ALLN

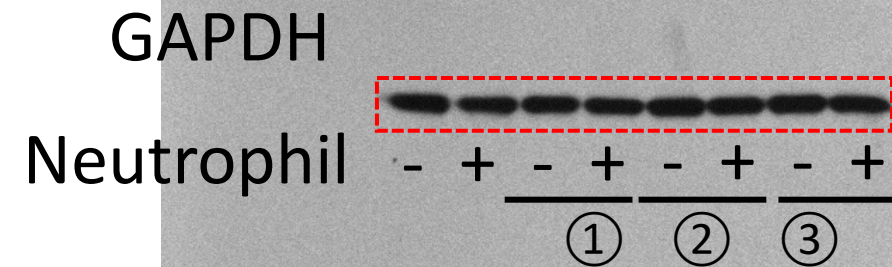

Full unedited blot for Figure S2C

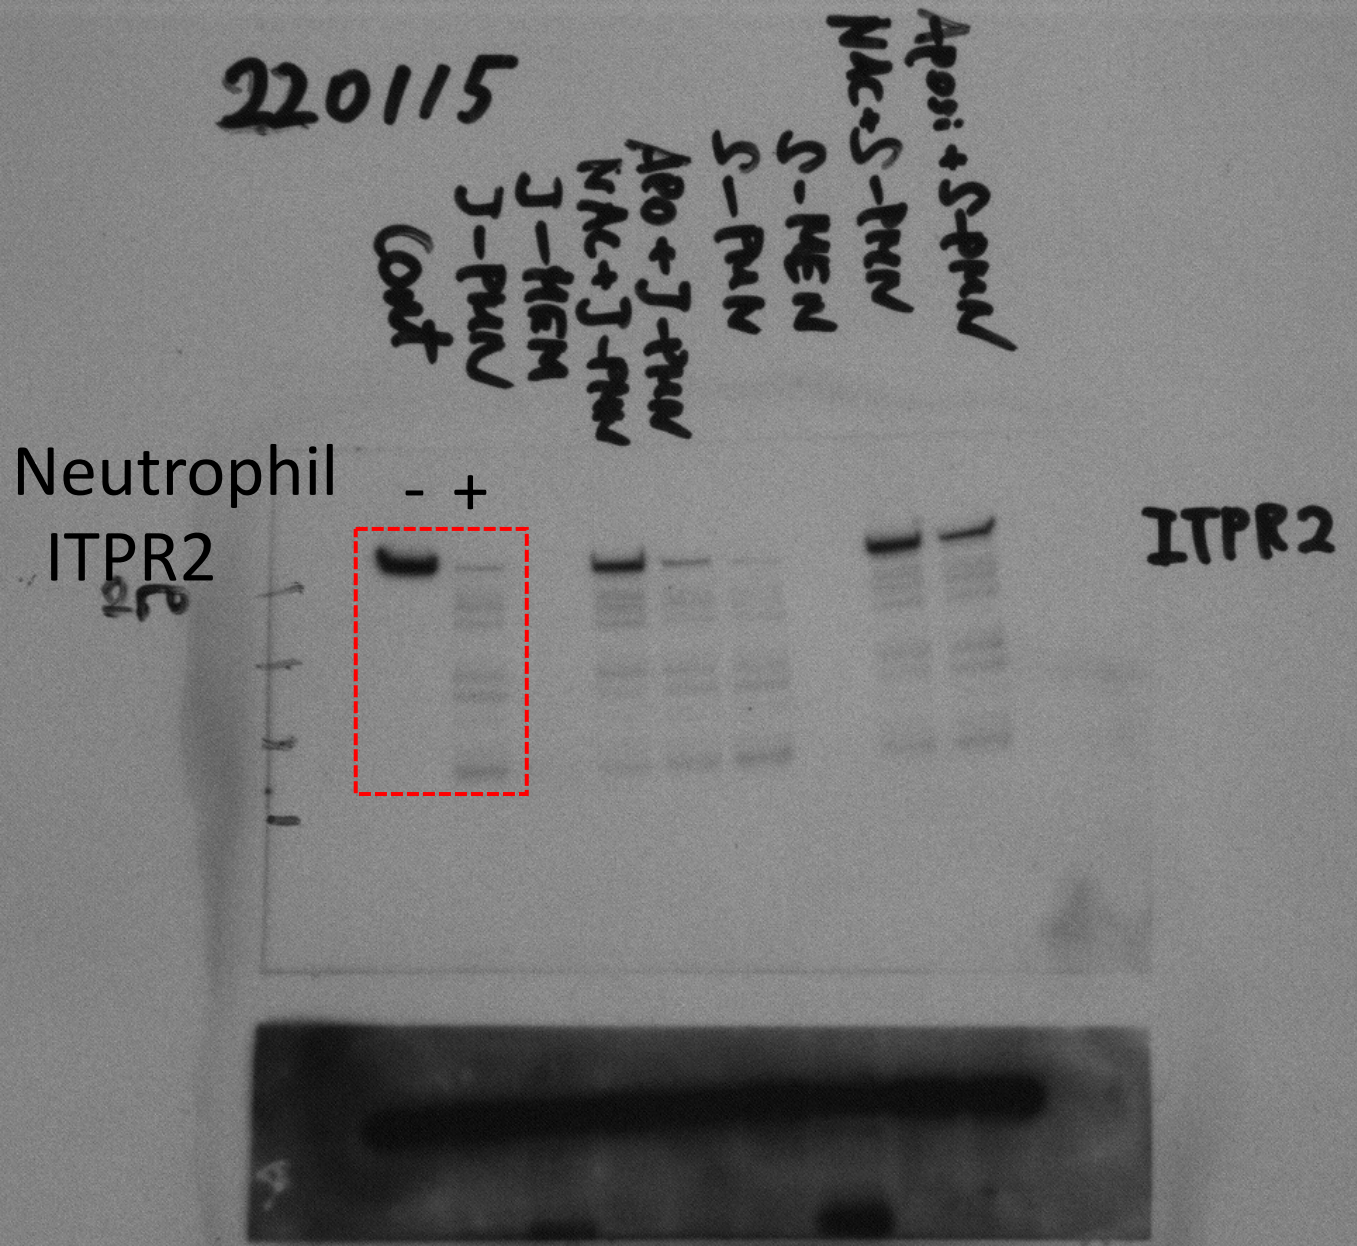

Full unedited blot for Figure S2C

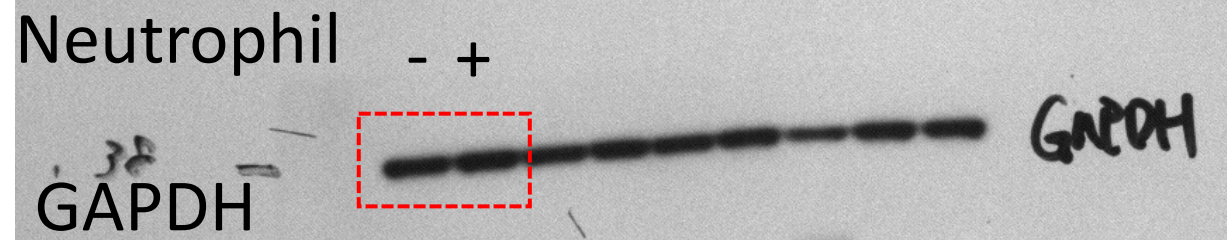





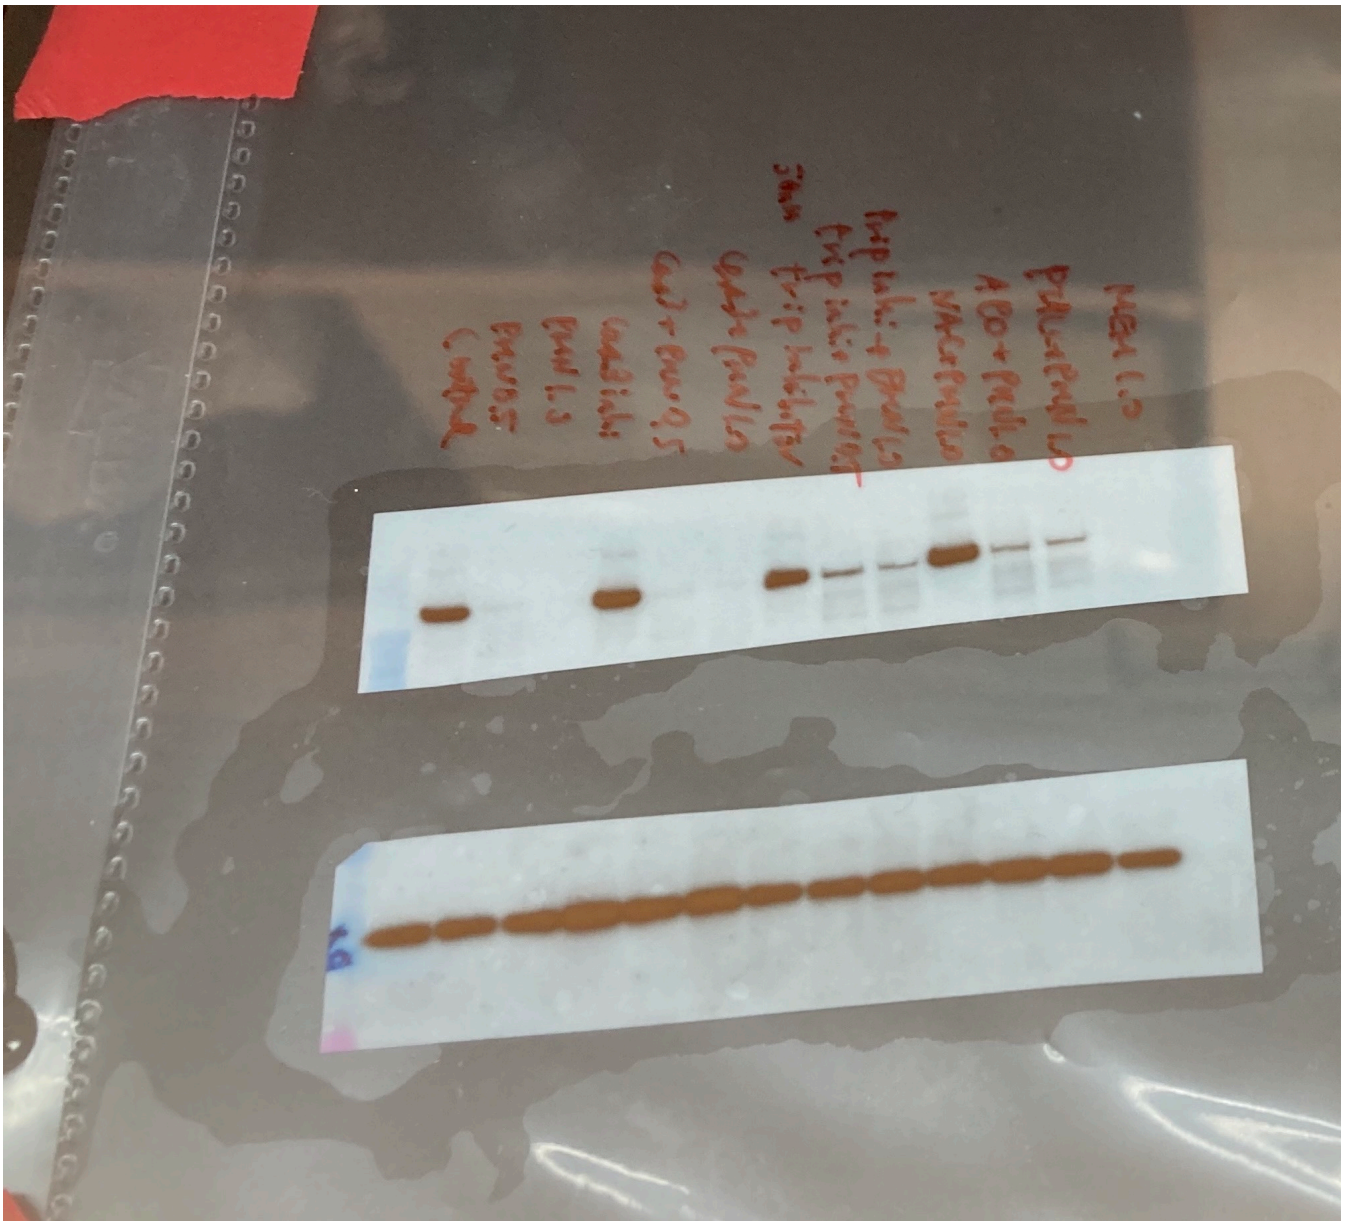

# Full unedited blot for Figure 3A, C

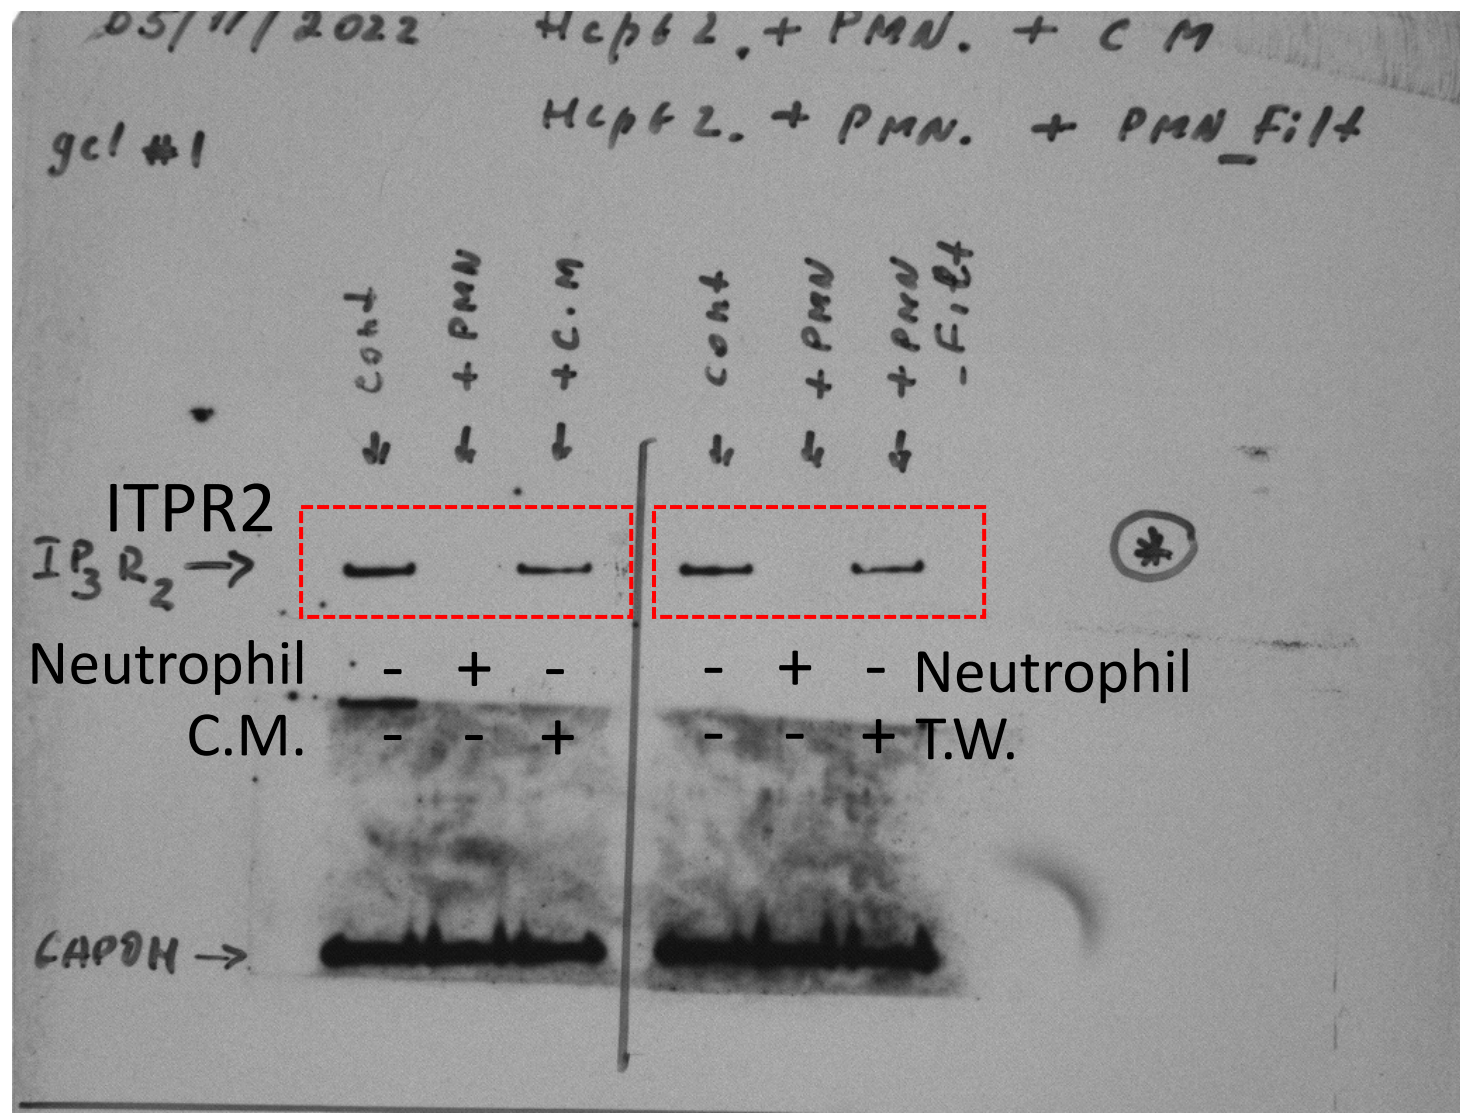

Full unedited blot for Figure 3A, C

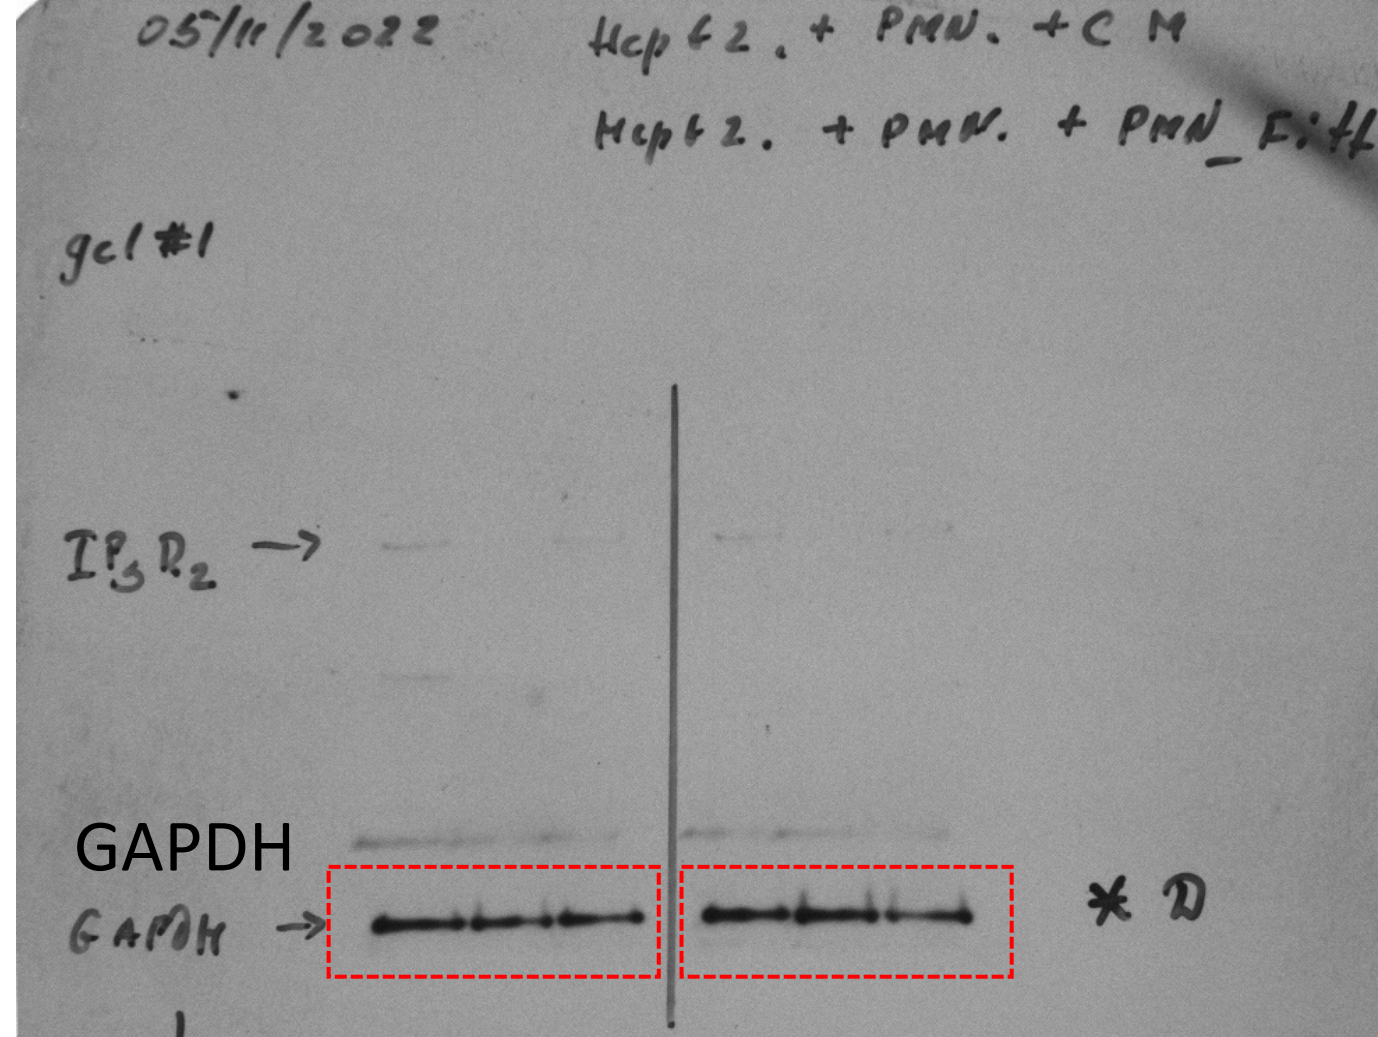

|            |   |   |   |   |   |   |            |
|------------|---|---|---|---|---|---|------------|
| Neutrophil | - | + | - | - | + | - | Neutrophil |
| C.M.       | - | - | + | - | - | + | T.W.       |

# Full unedited blot for Figure 3E

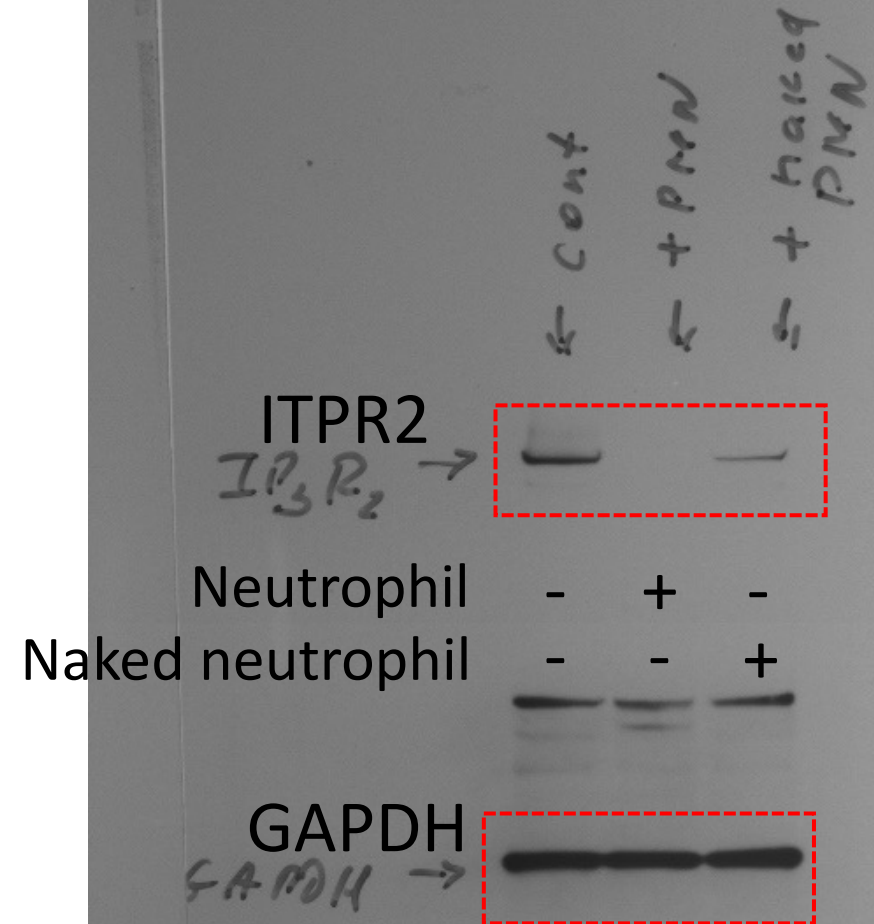

# Full unedited blot for Figure 3G

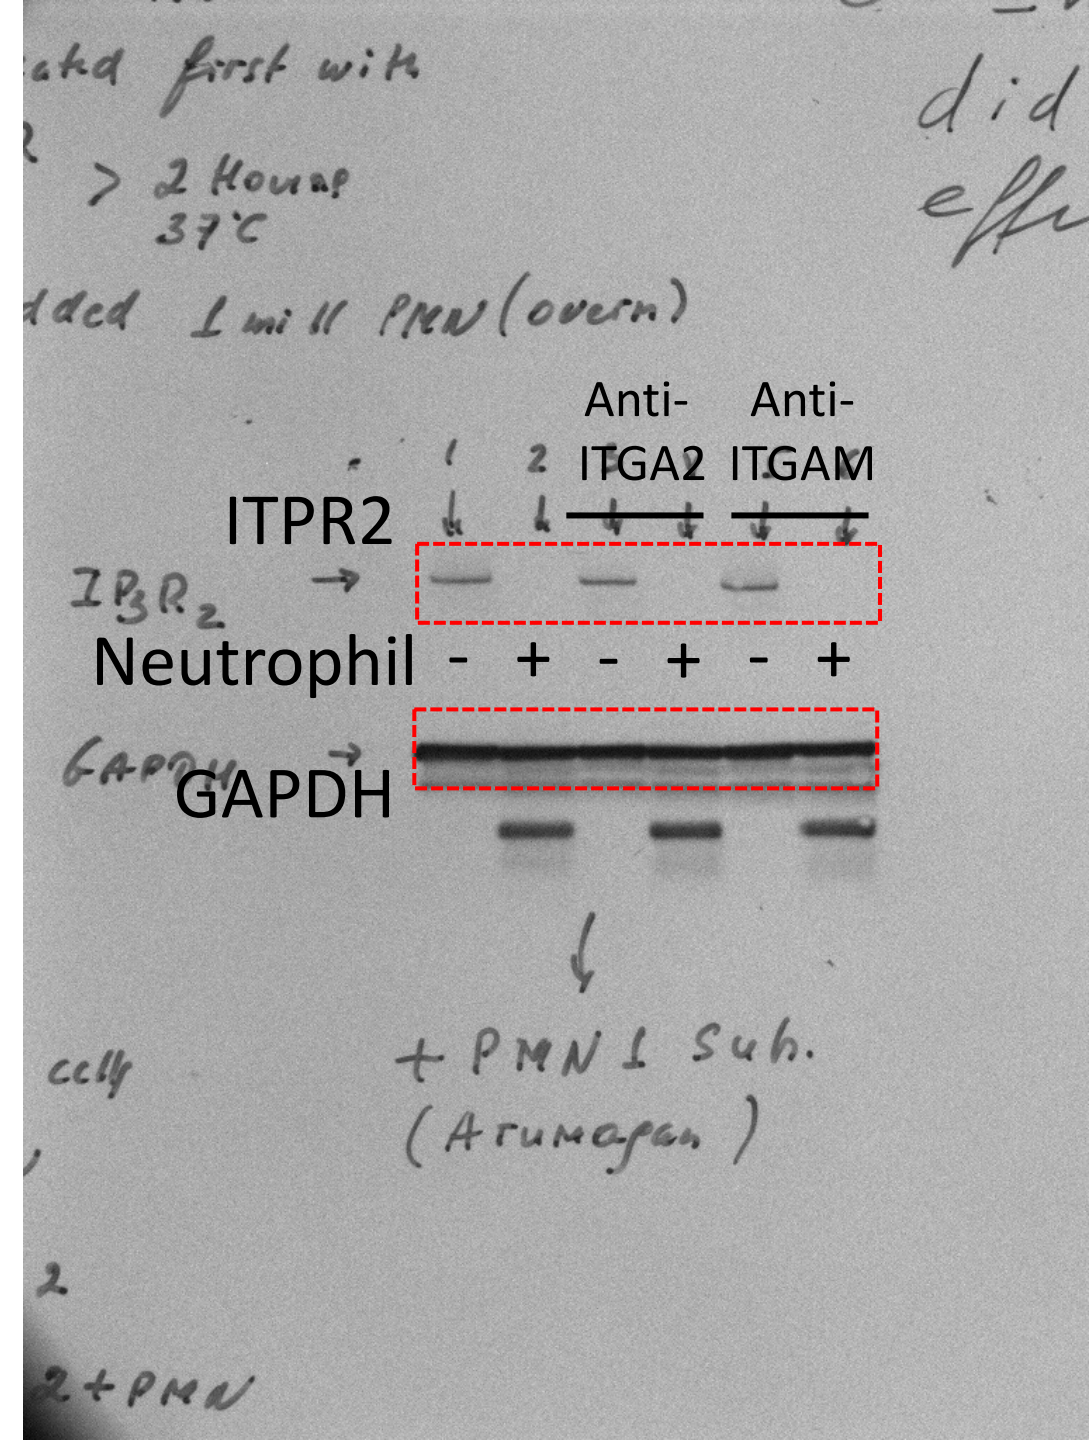

Full unedited blot for Figure 3I

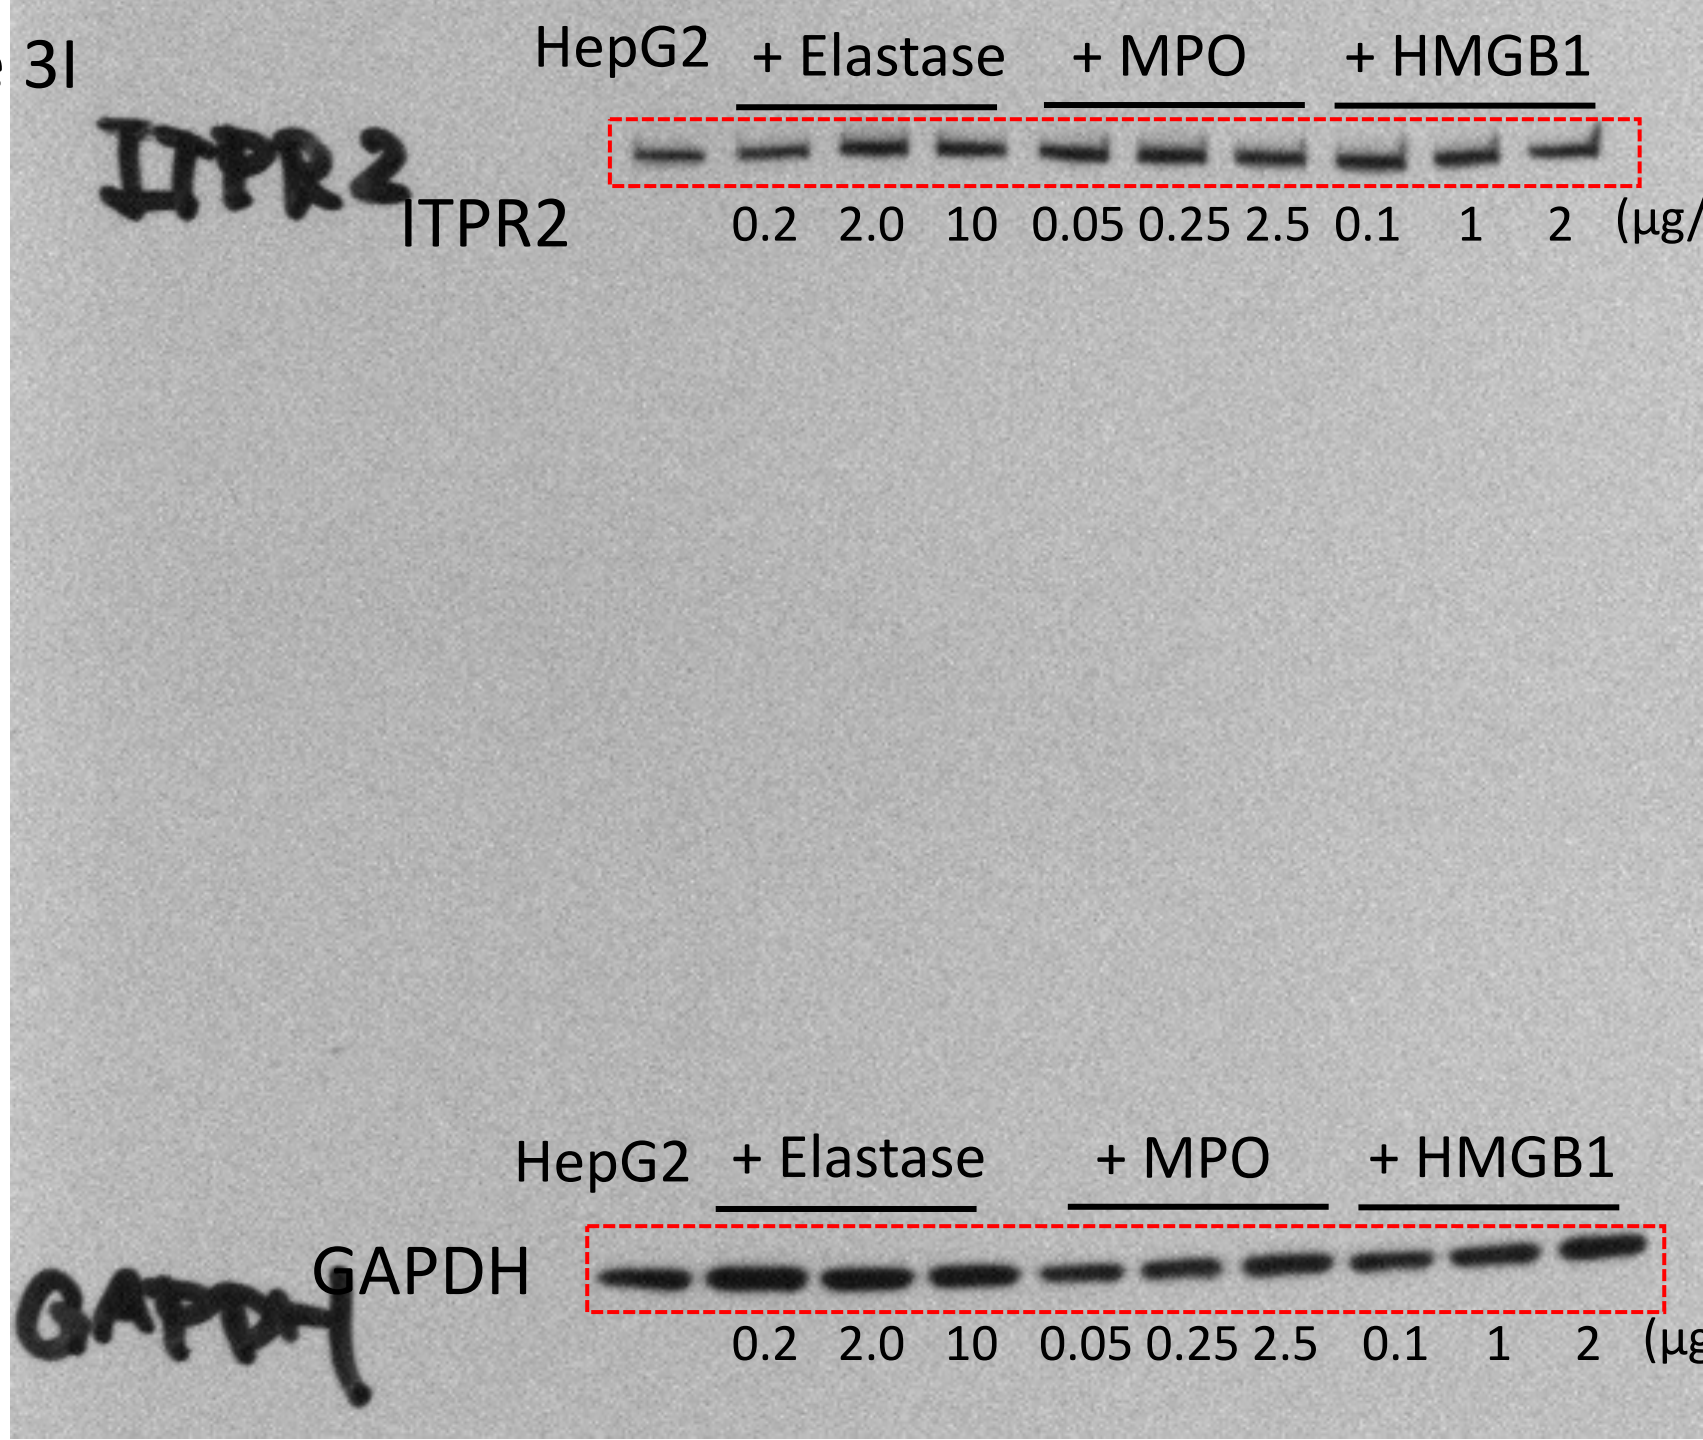

# Full unedited blot for Figure S3D

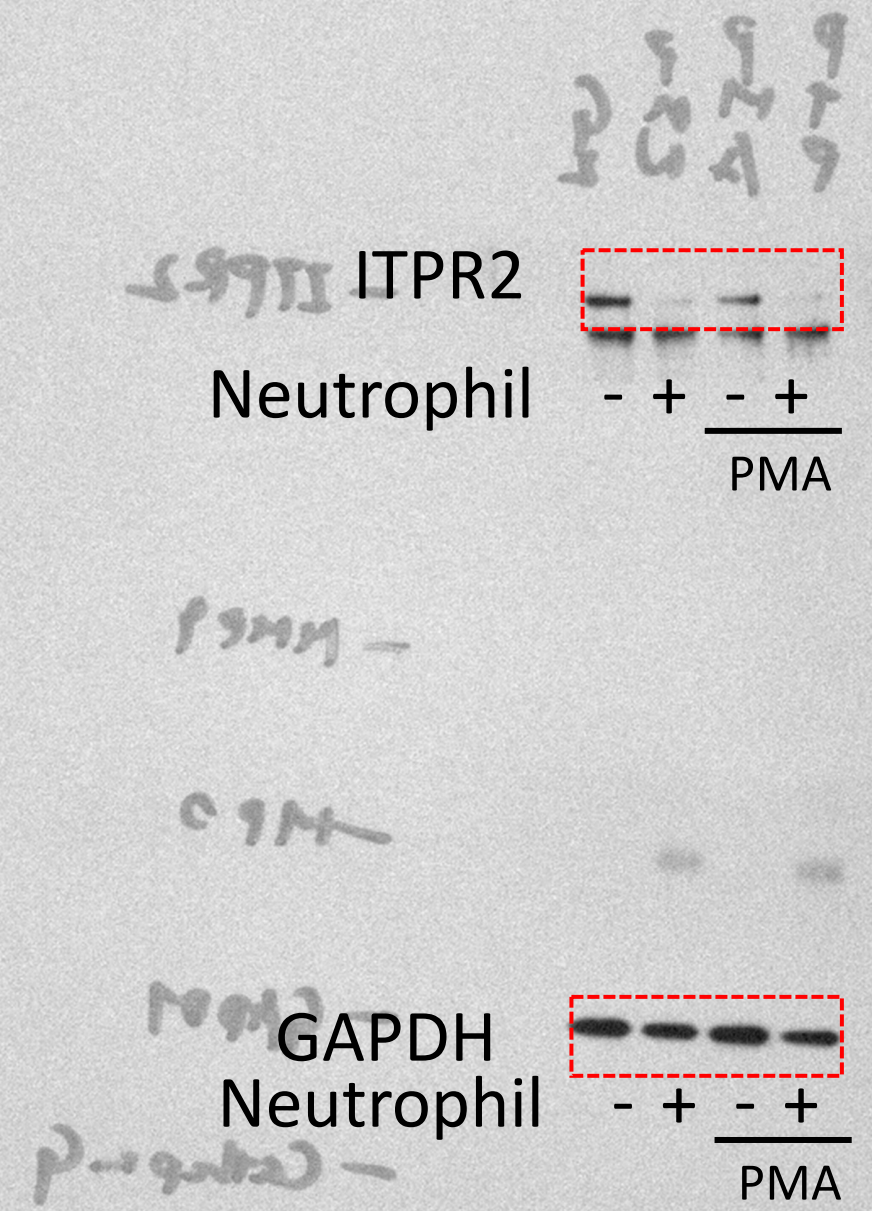



# Full unedited blot for Figure S3H

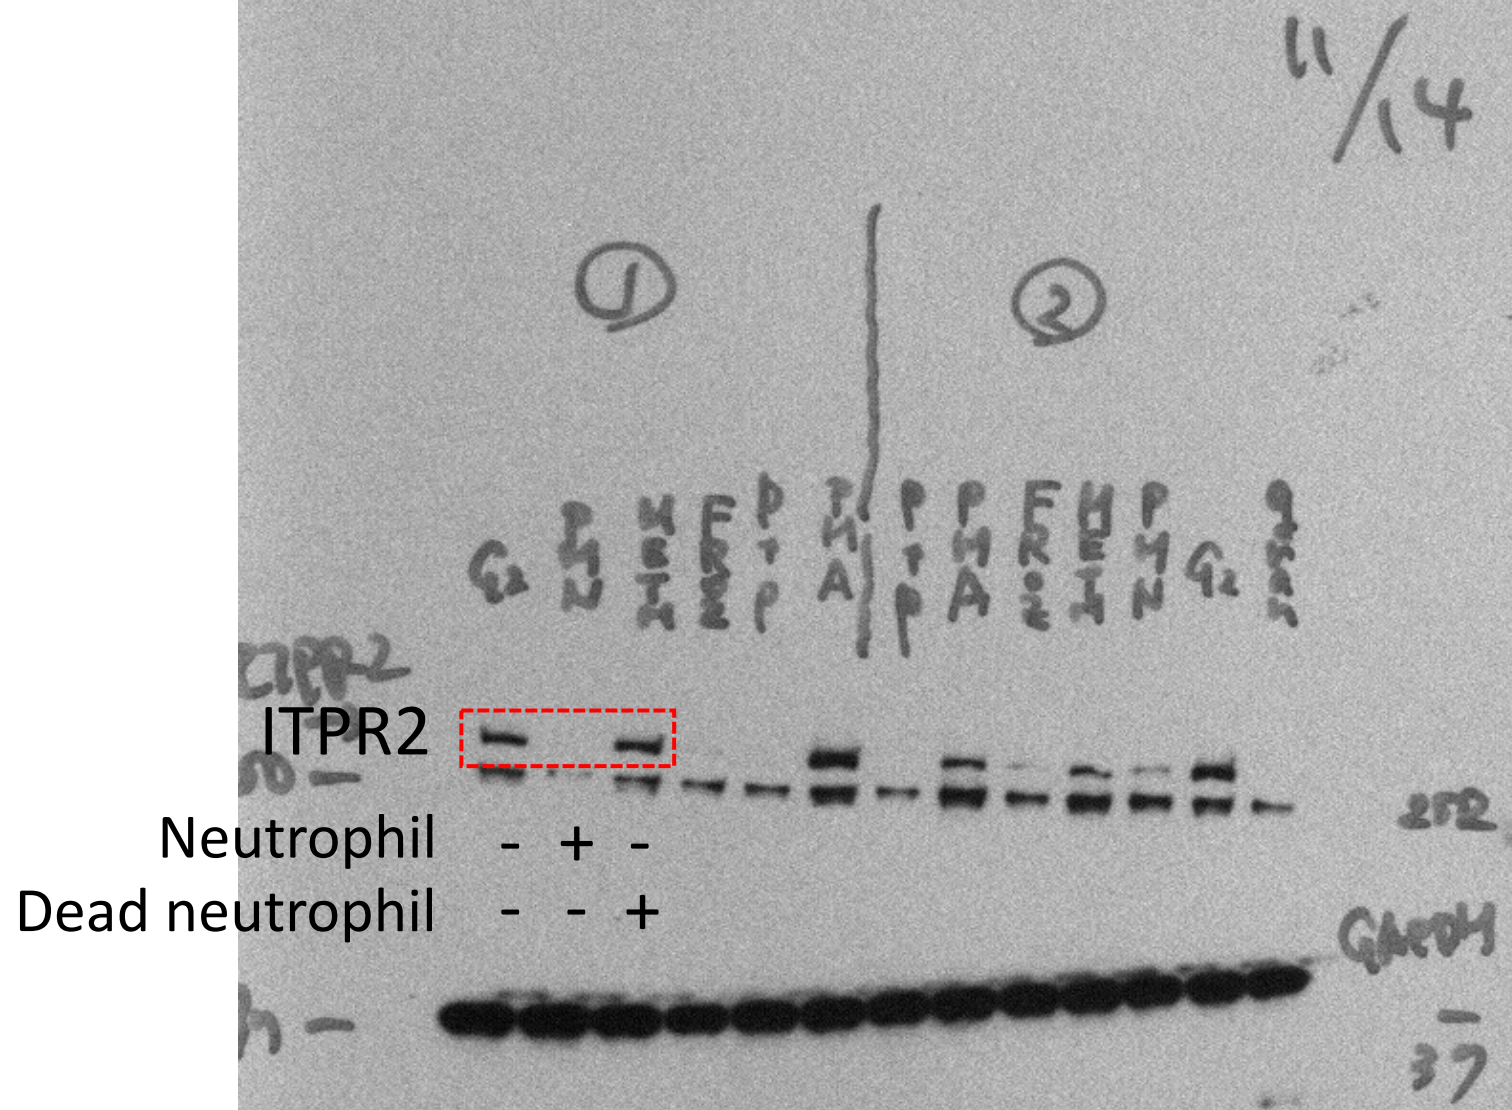



# Full unedited blot for Figure 4B

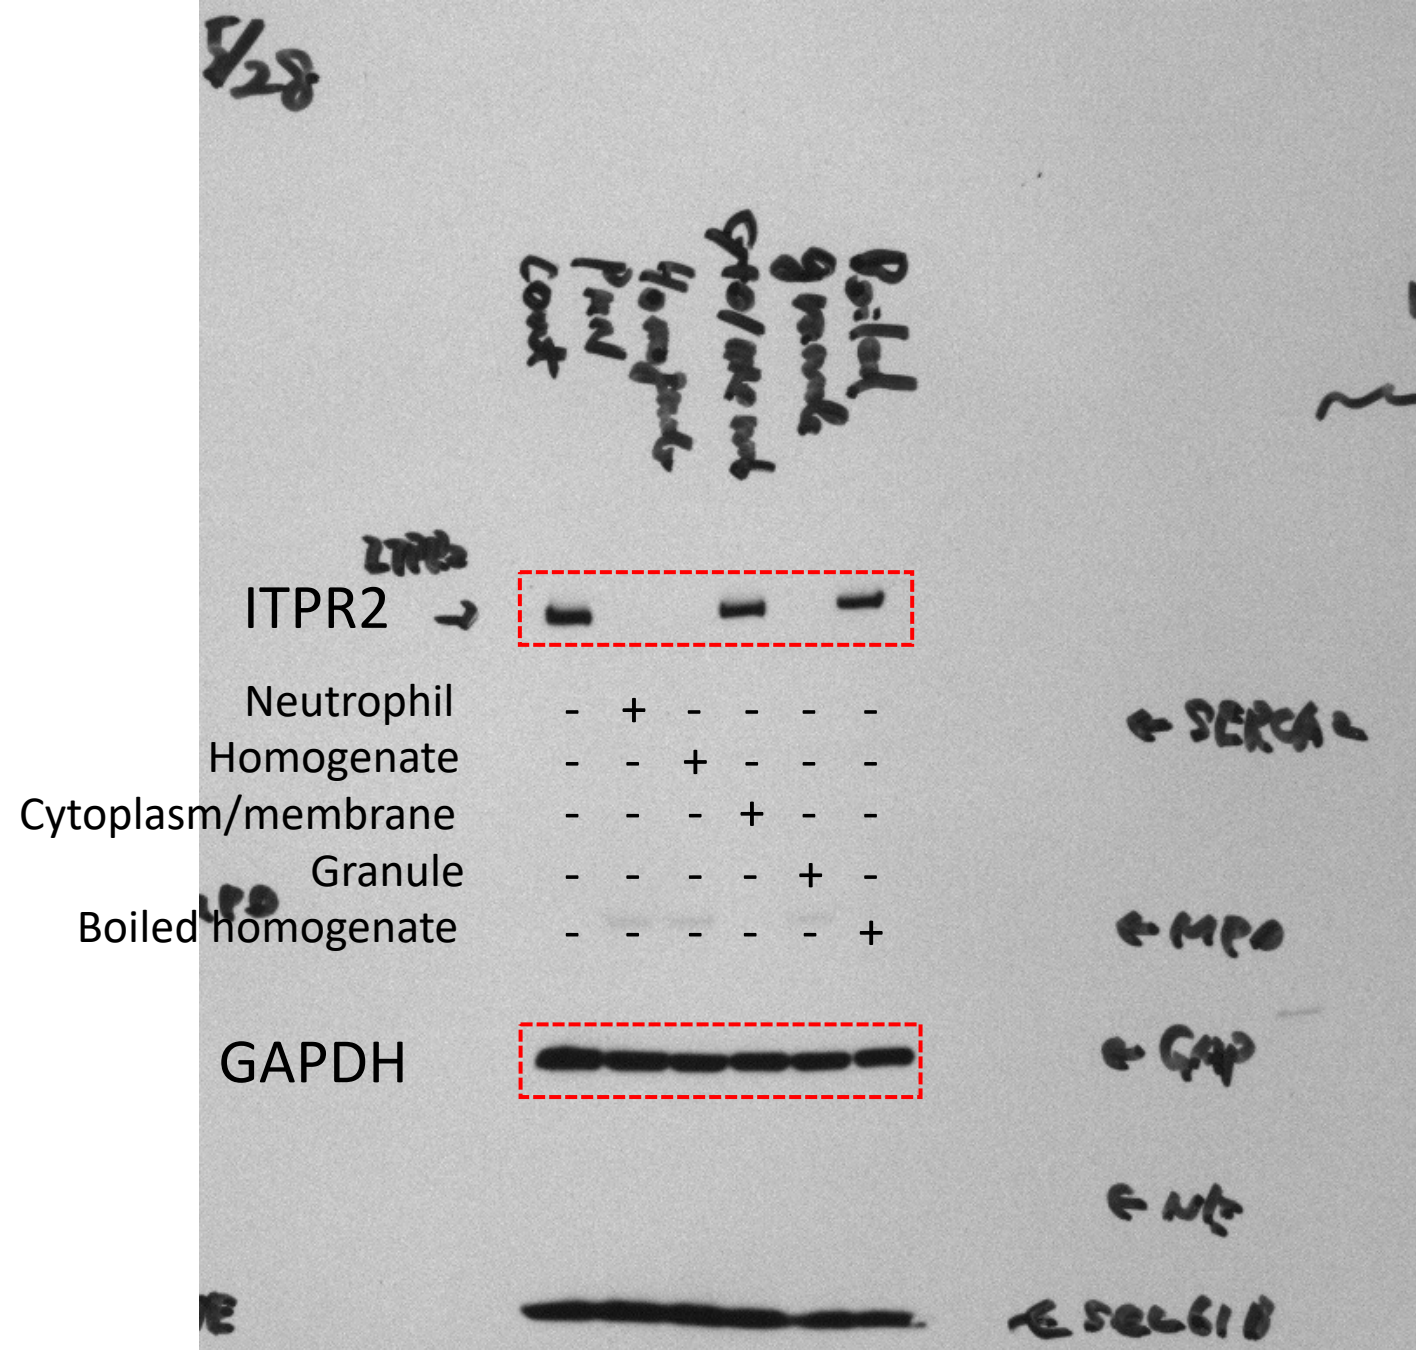



# Full unedited blot for Figure S4A

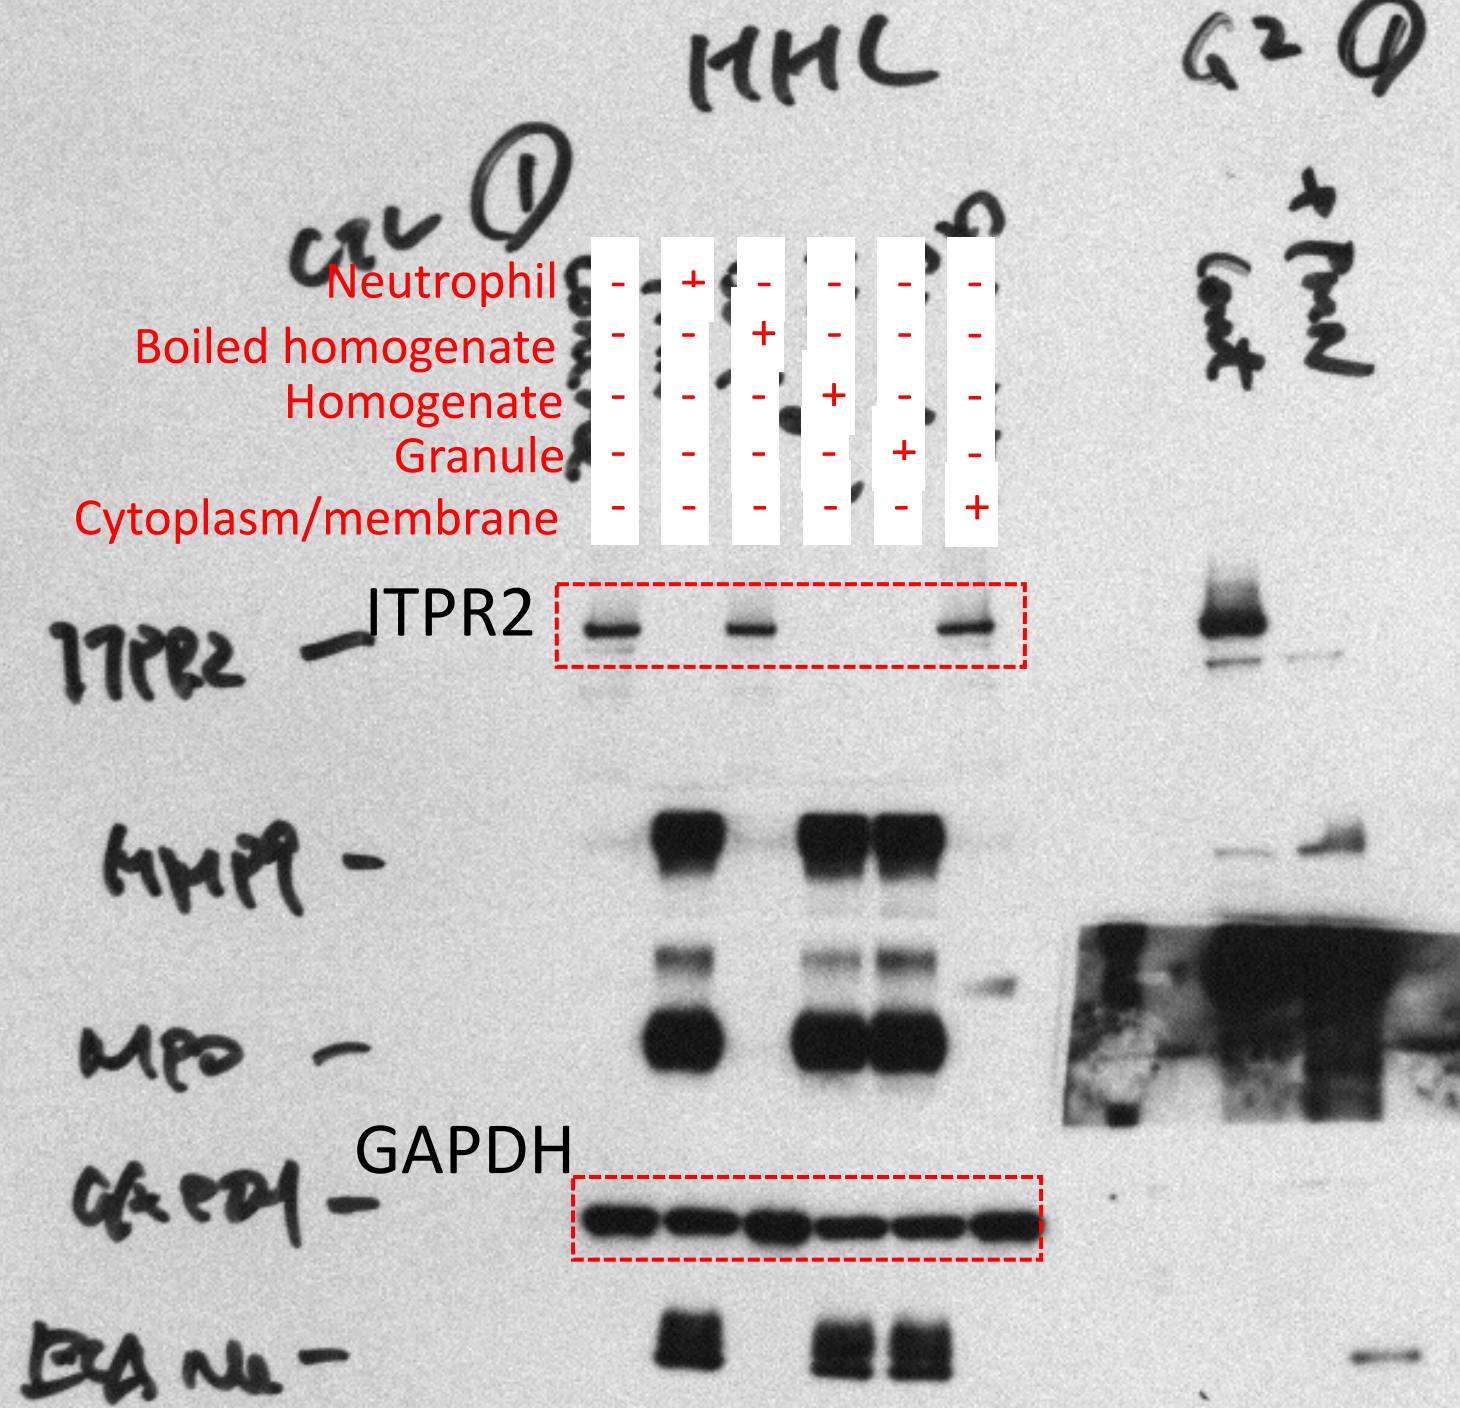

# Full unedited blot for Figure S4E

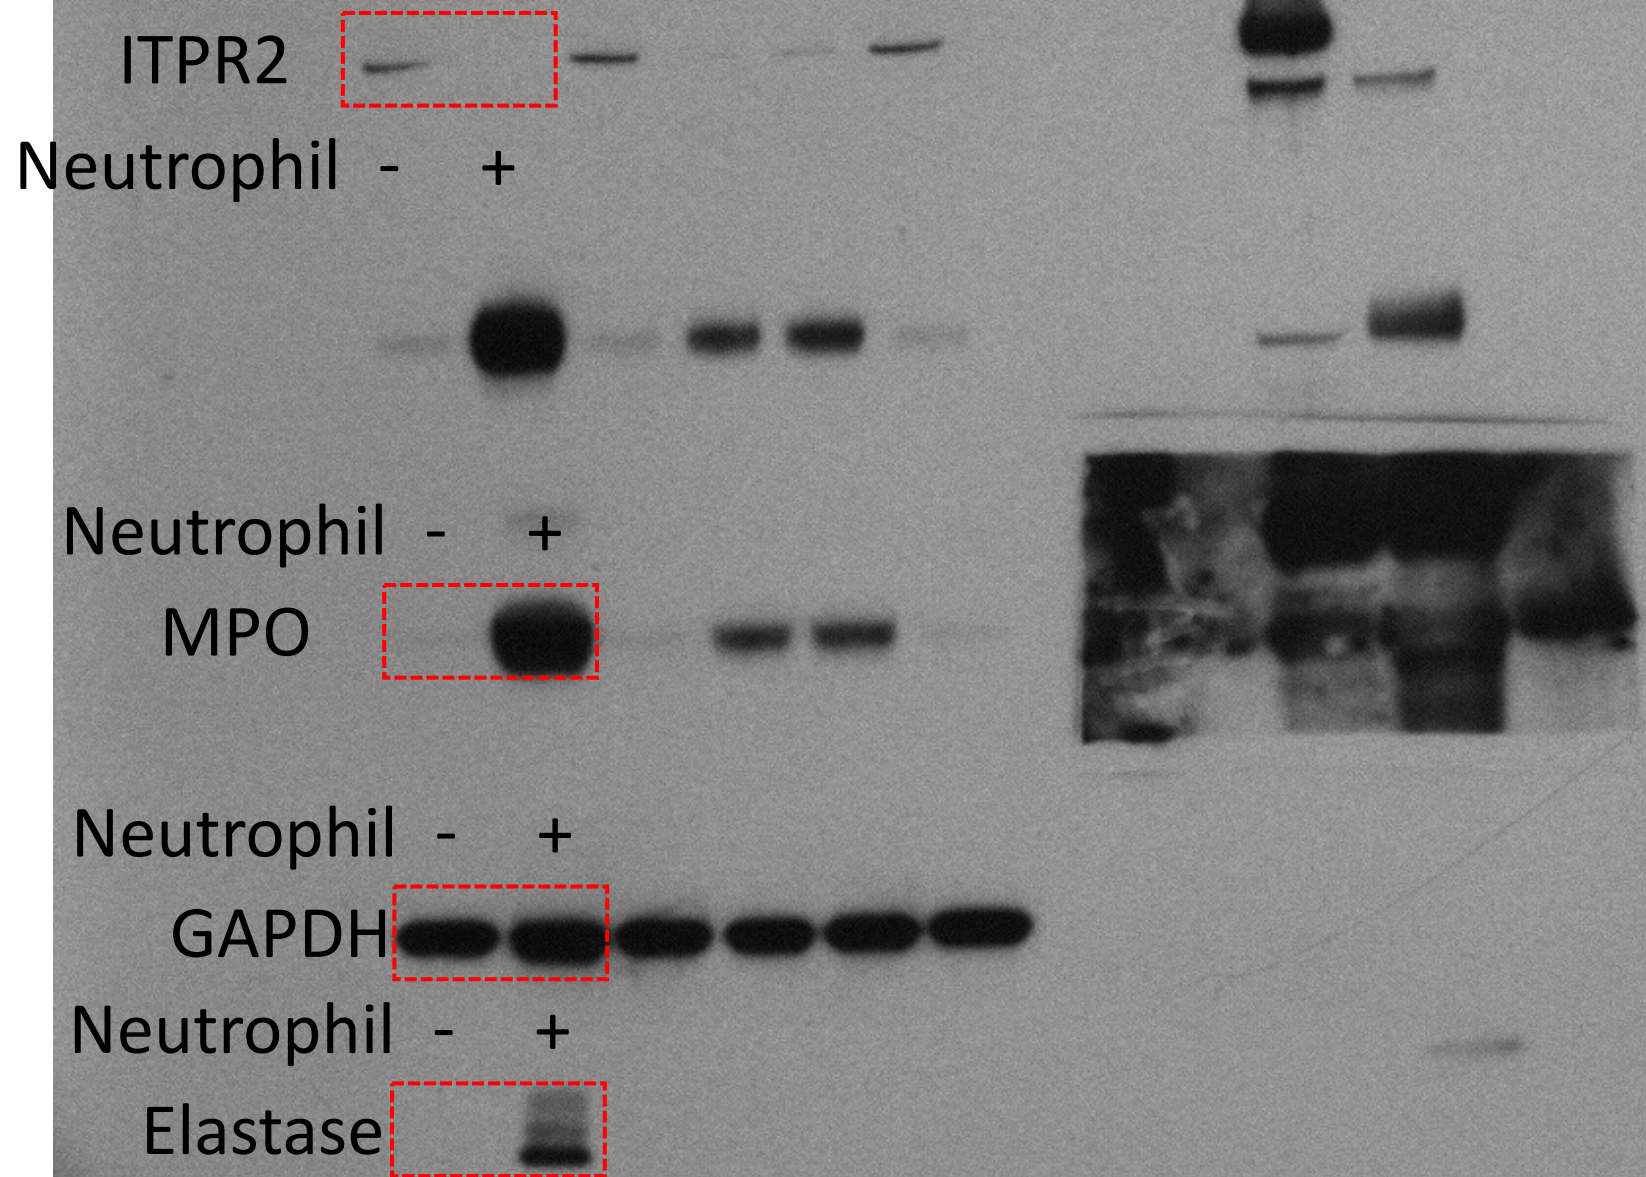

Full unedited blot for Figure S4I

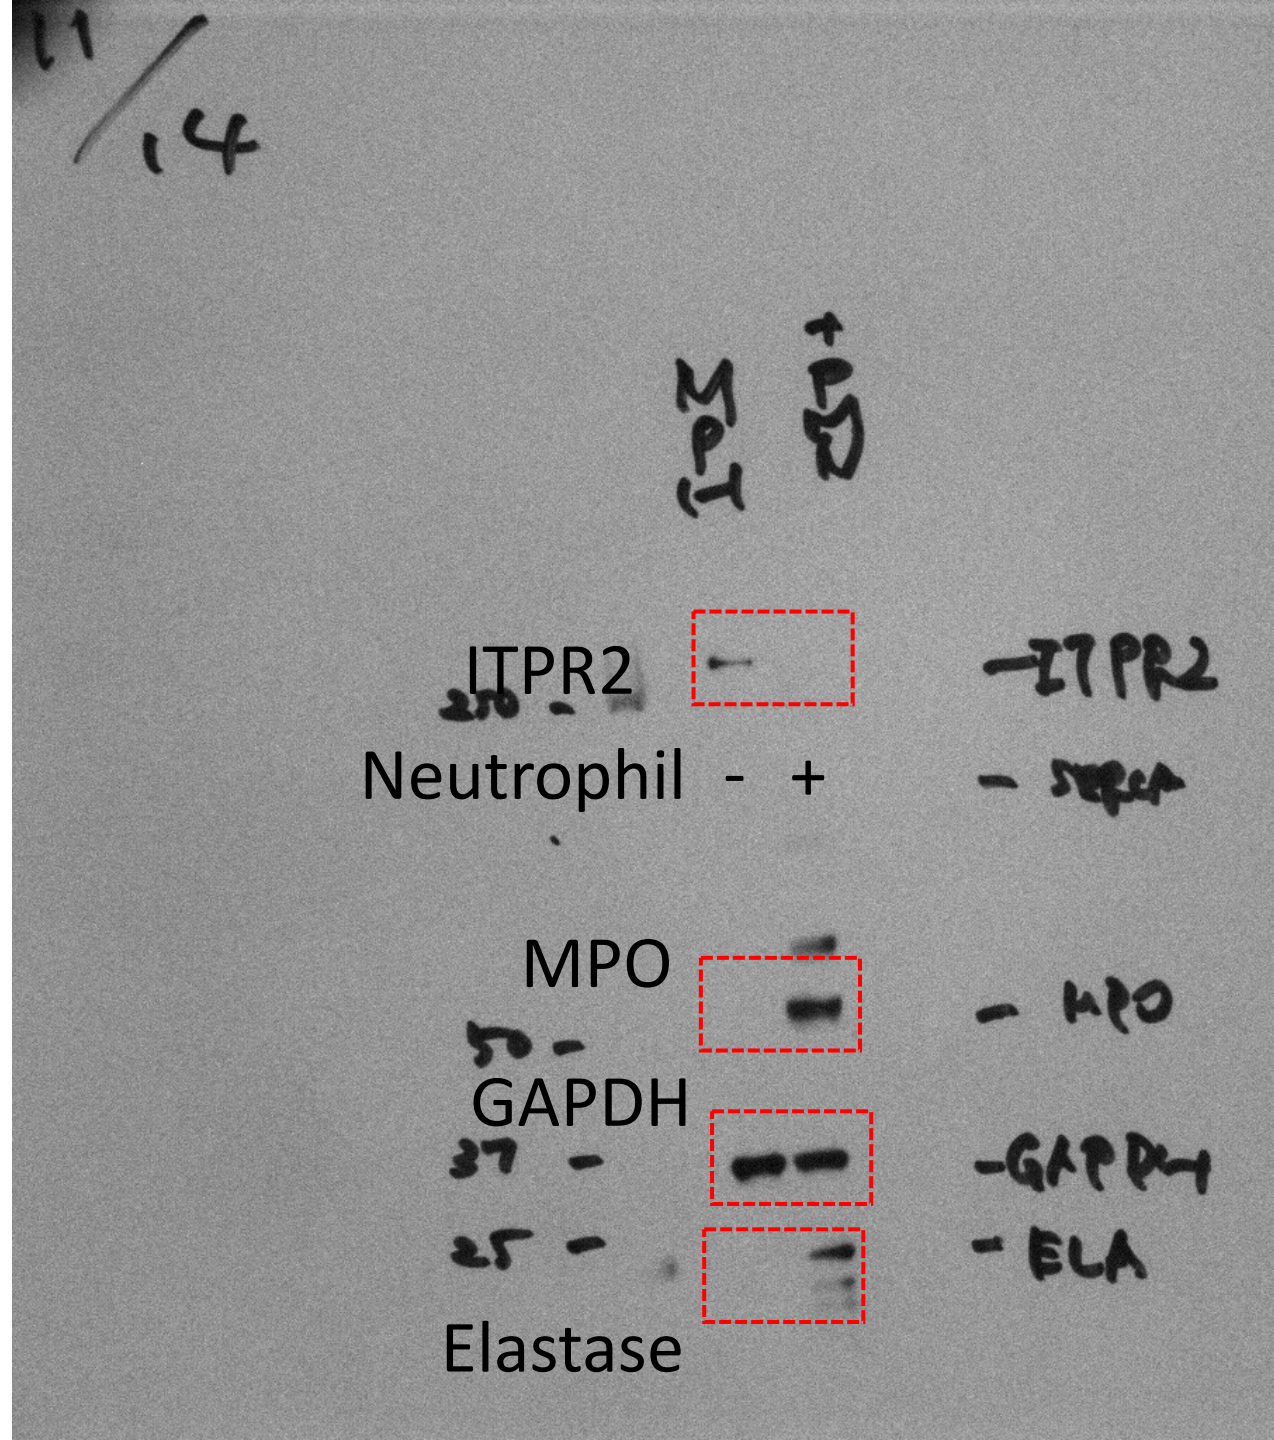

Full unedited blot for Figure 5A

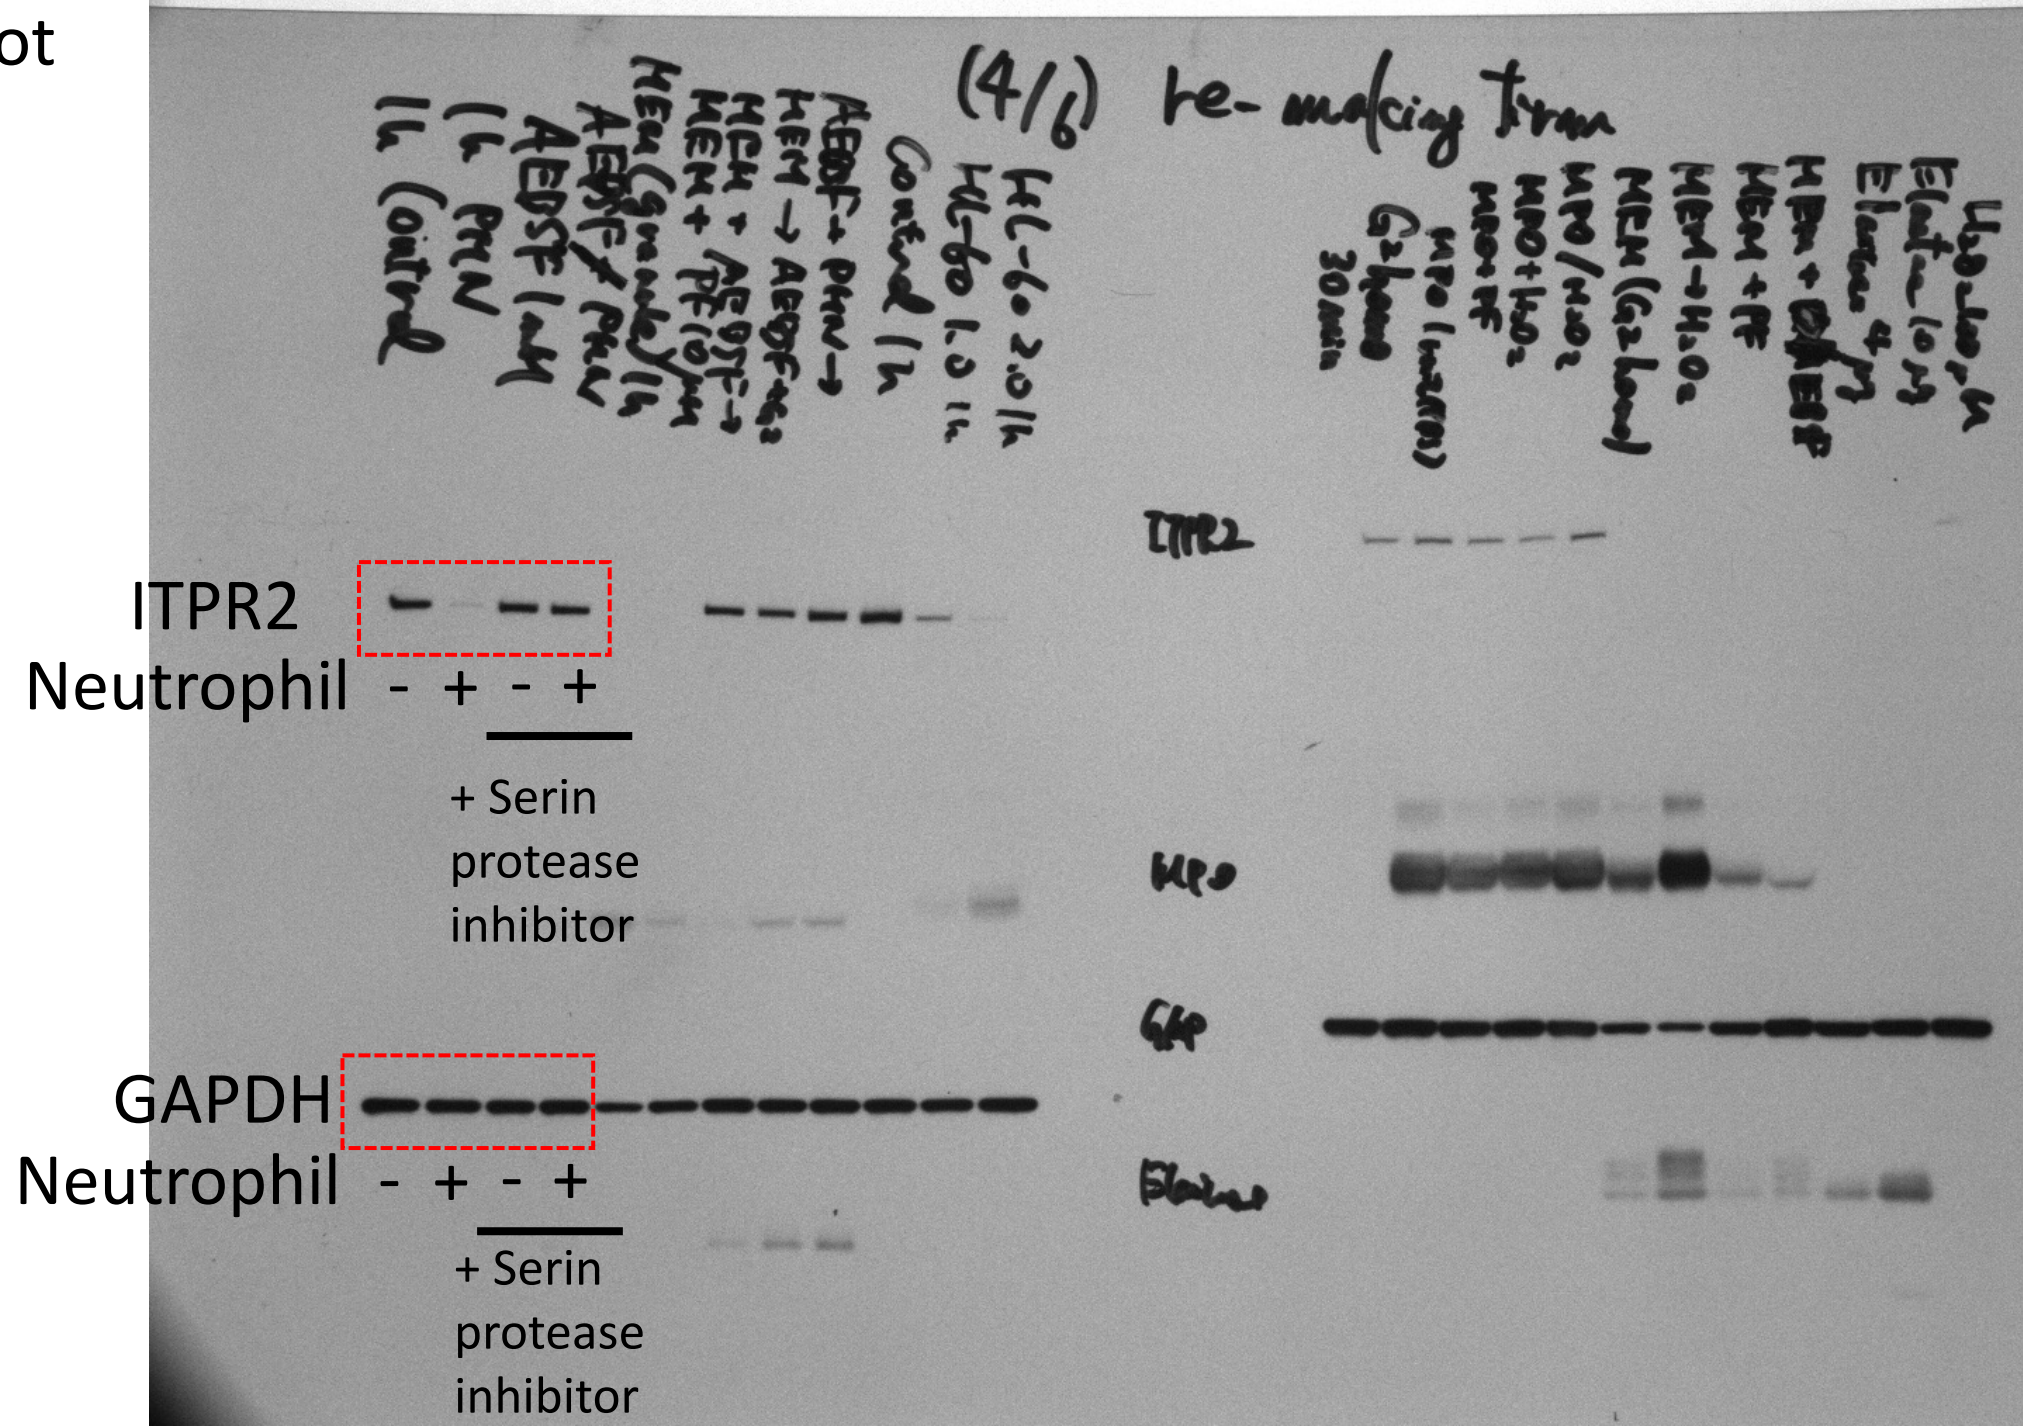





Full unedited blot  
for Figure 5E

ITPR2

|          |   |      |     |     |     |
|----------|---|------|-----|-----|-----|
| MPO      | - | 0.25 | 2.5 | -   | -   |
| Elastase | - | -    | -   | 0.2 | 2.0 |

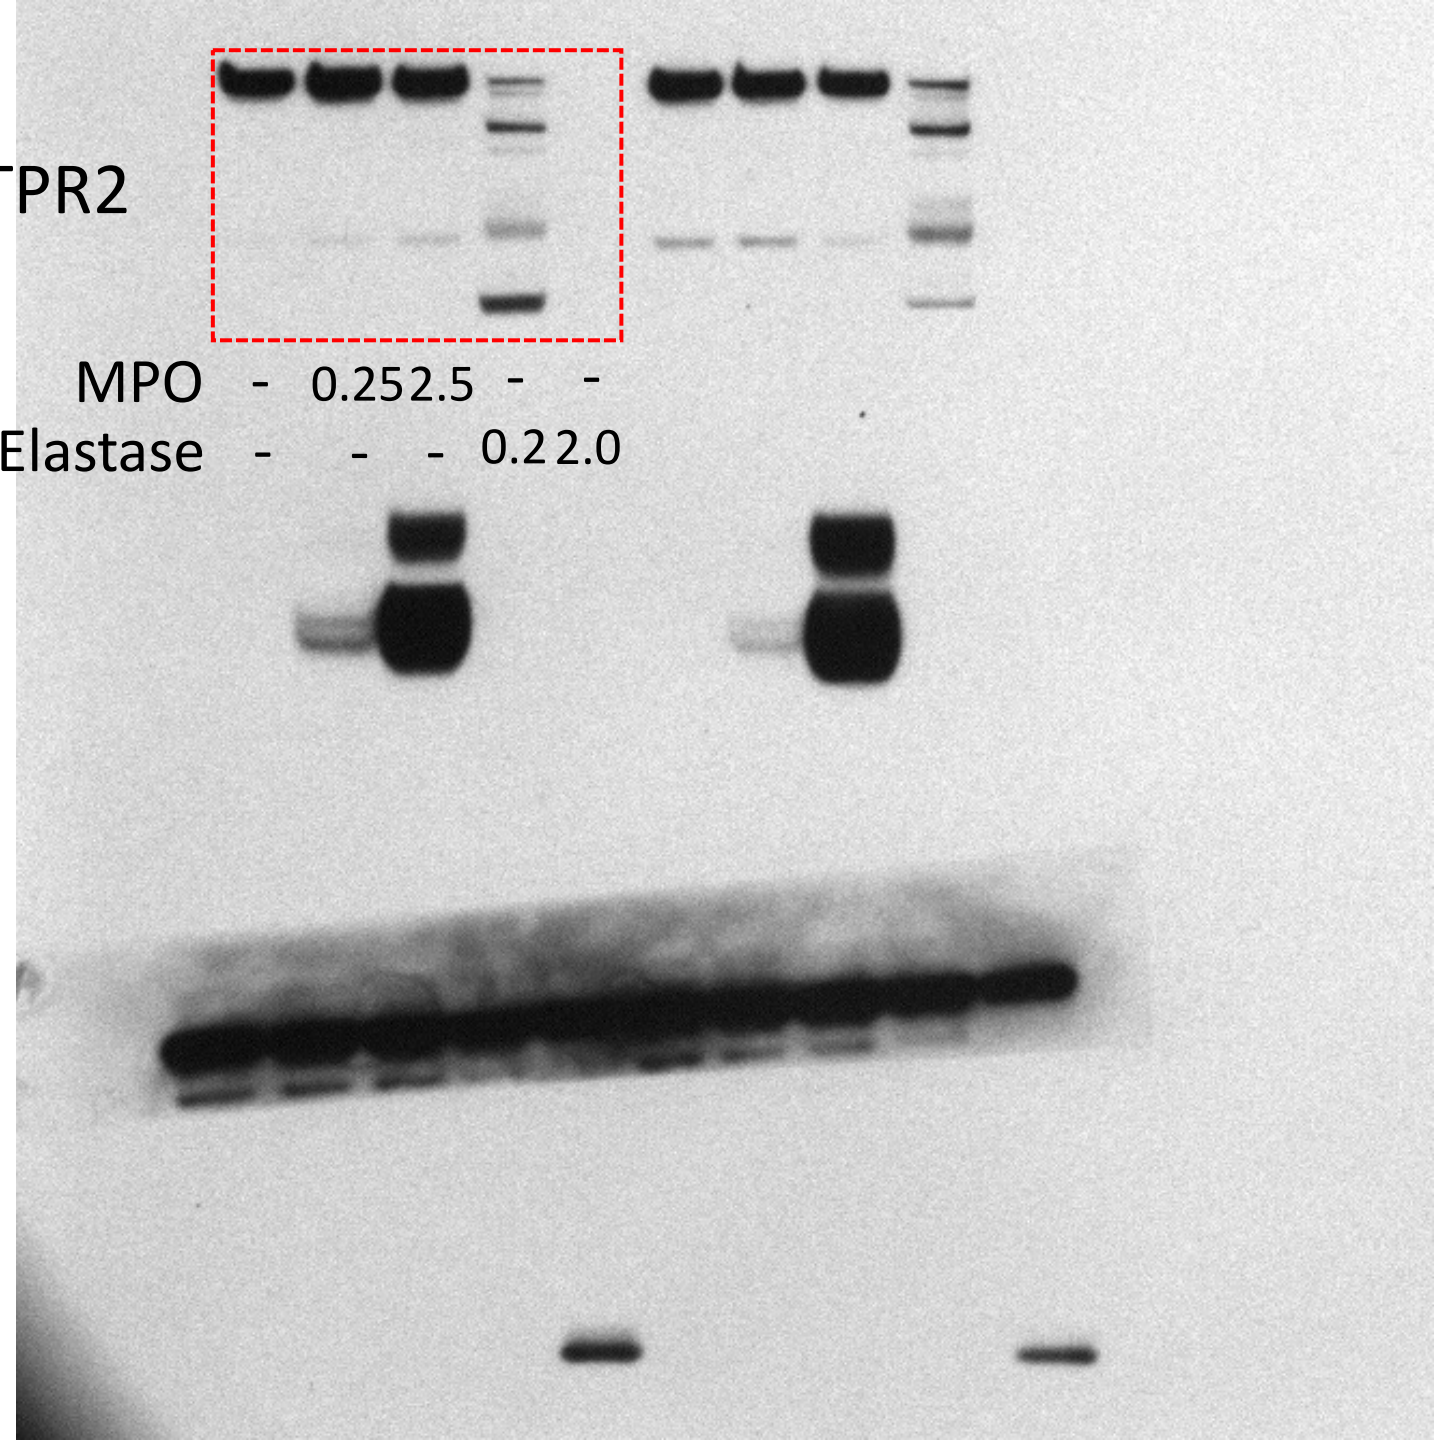

Full unedited blot  
for Figure 5E

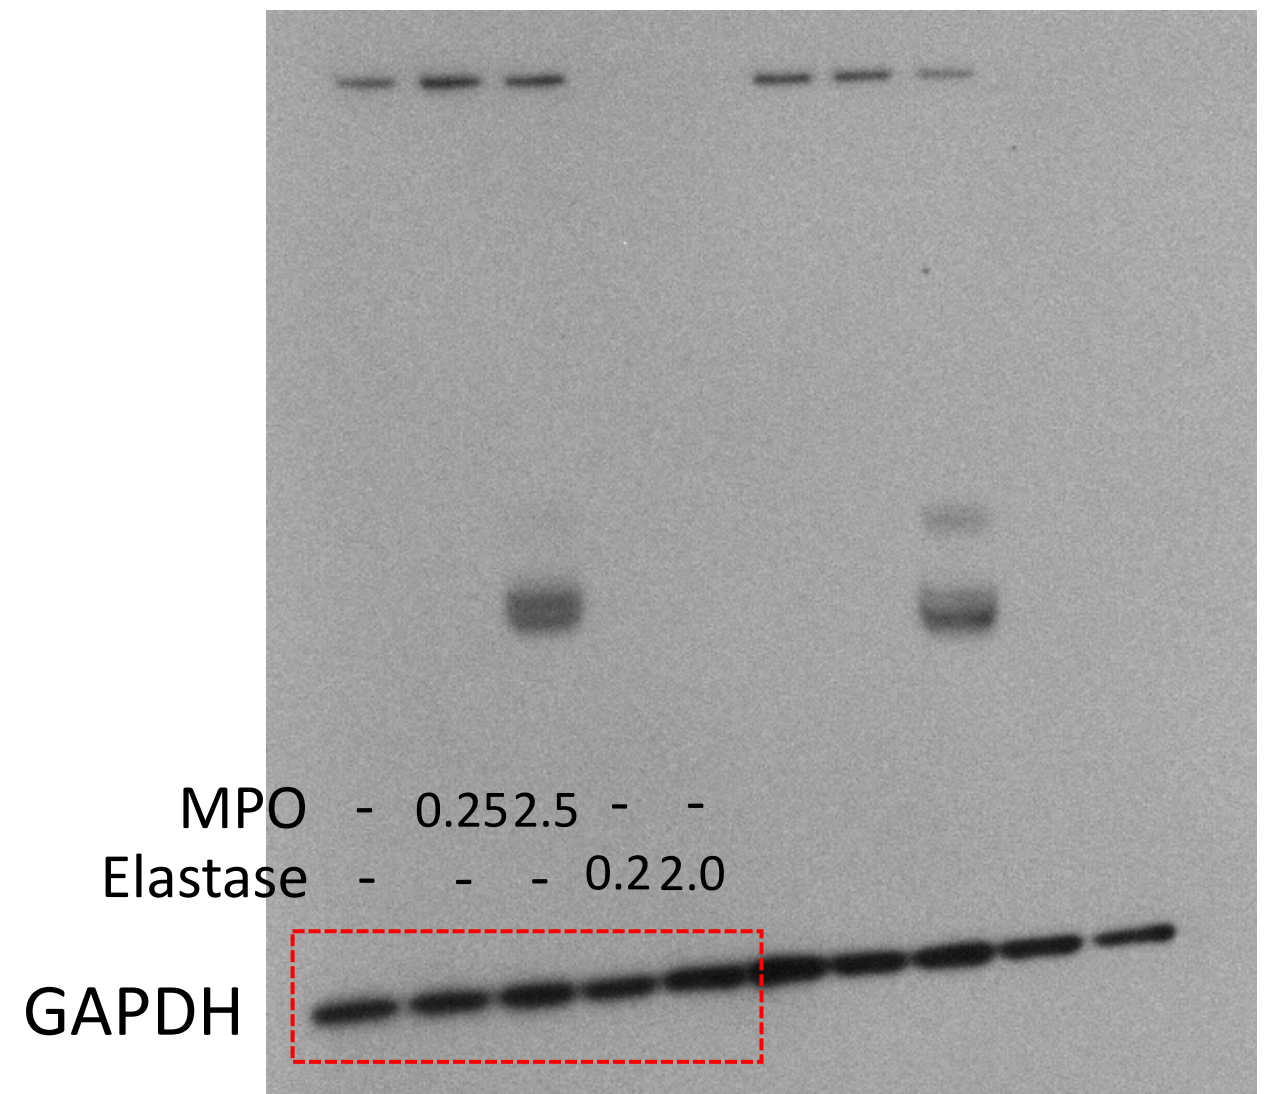

Full unedited blot  
for Figure 5J

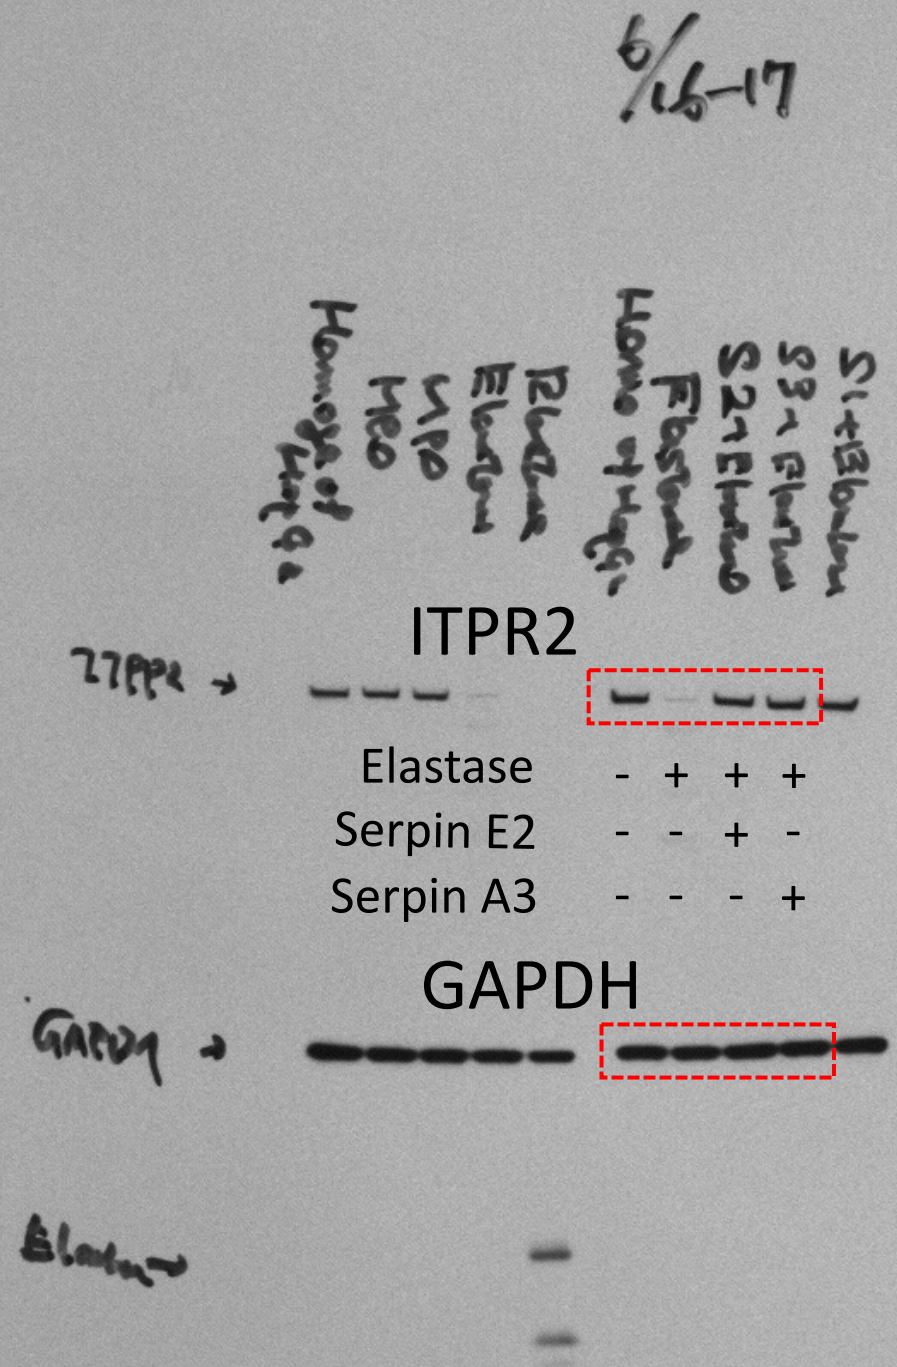

Full unedited blot  
for Figure S5A

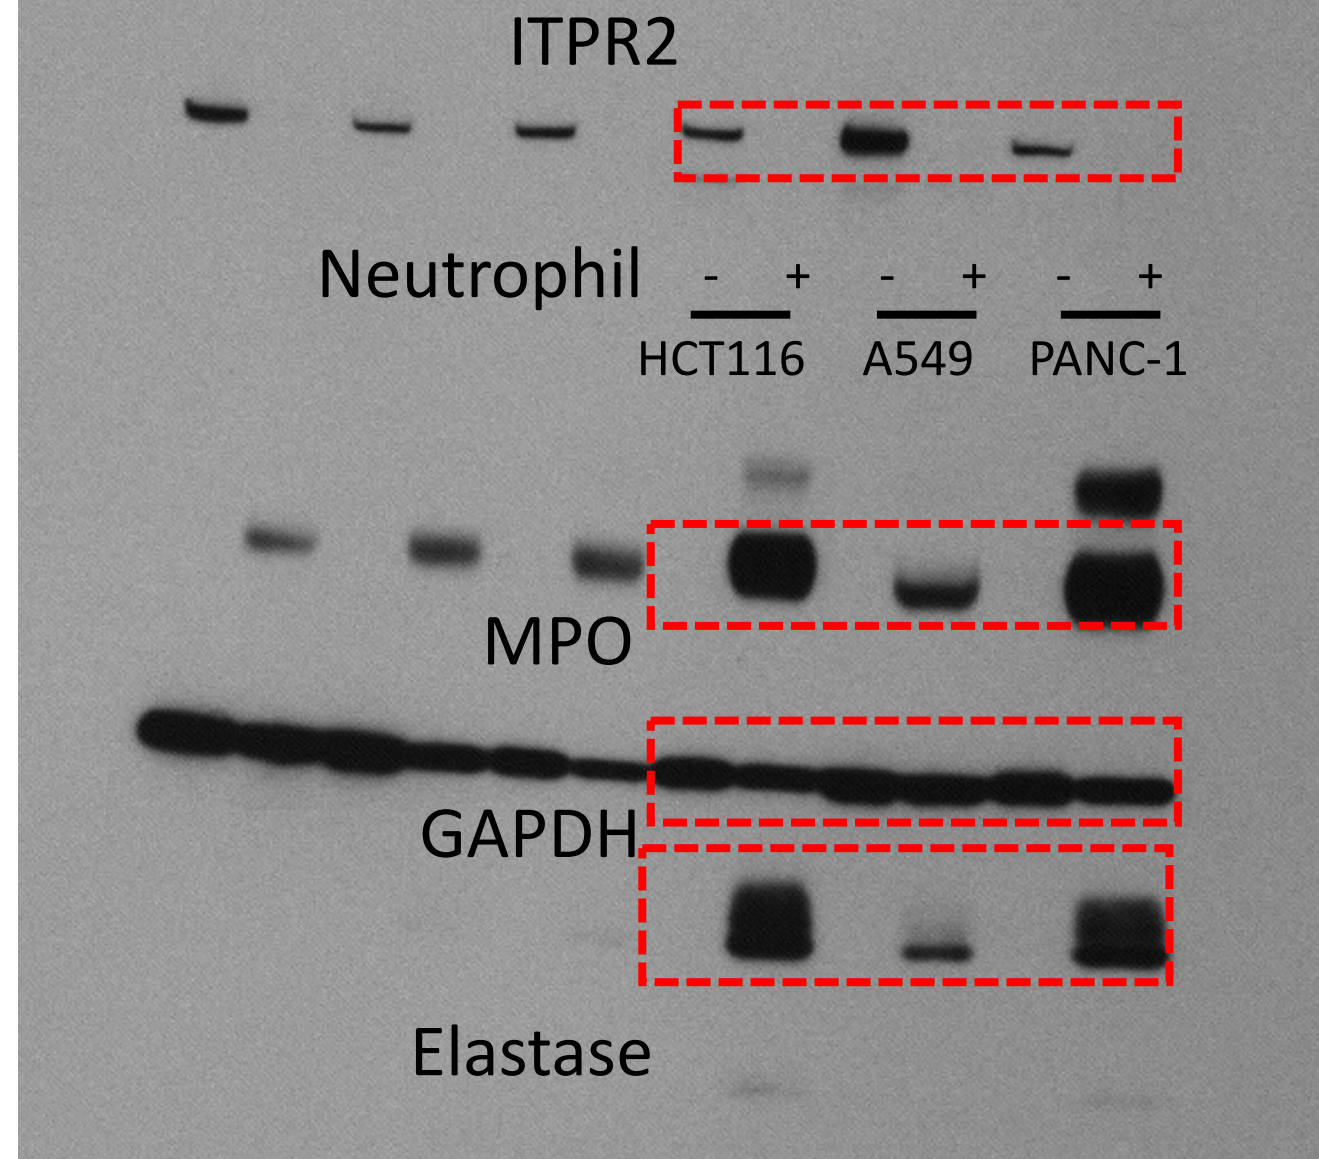

Full unedited blot  
for Figure S5C

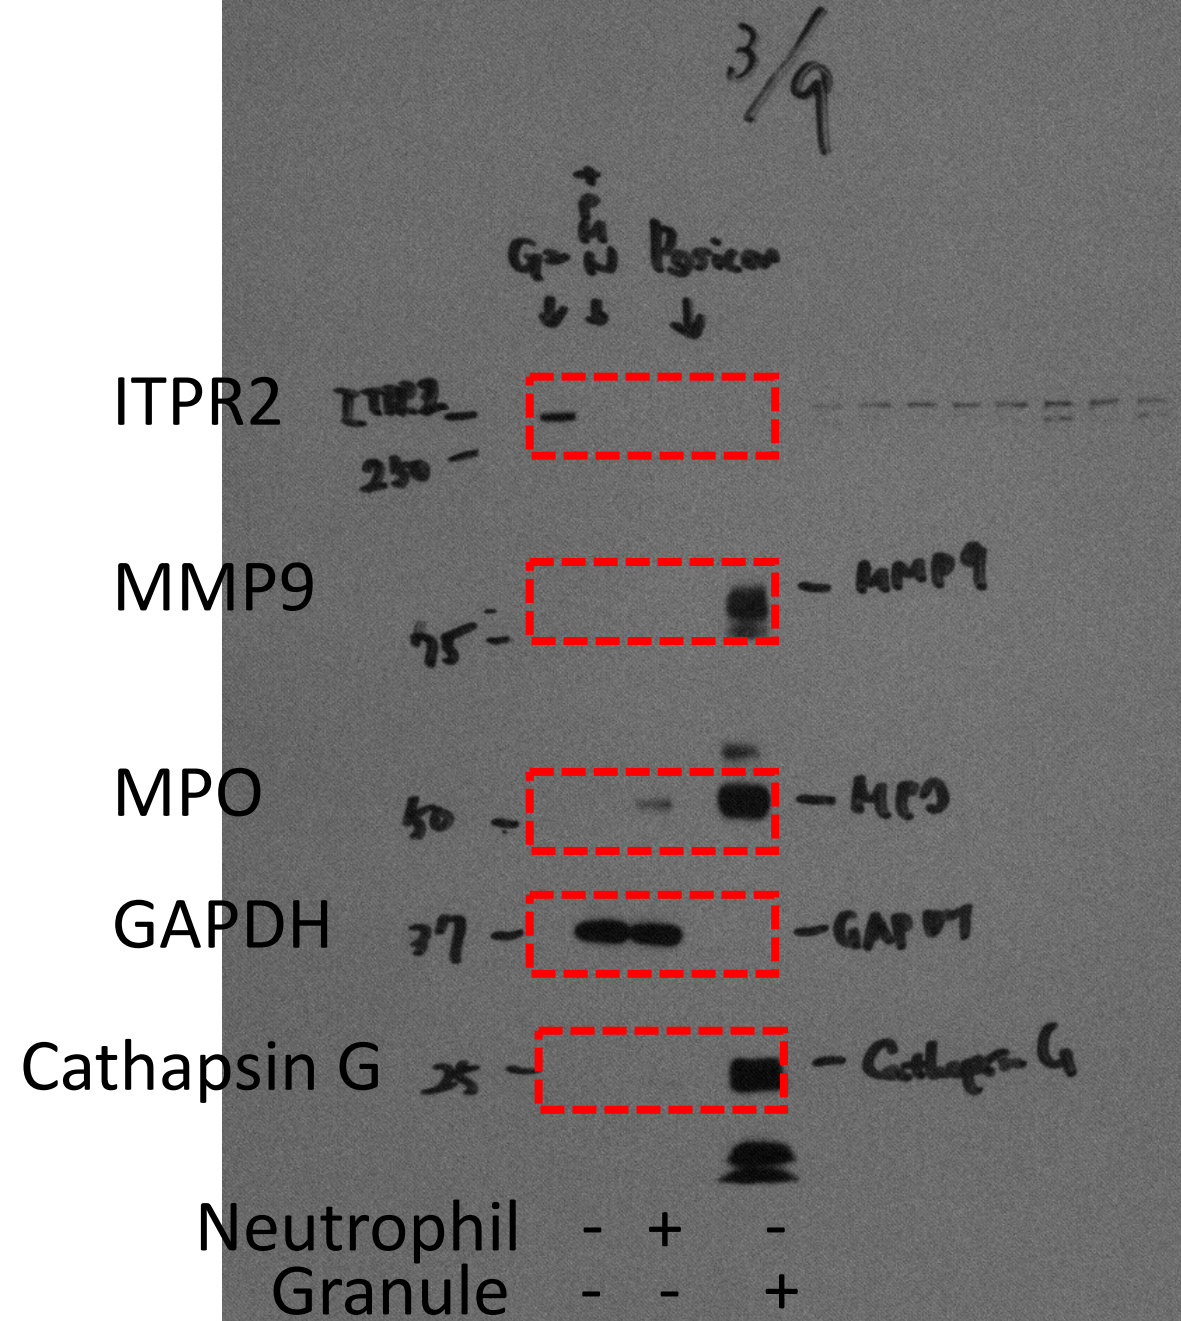

Full unedited blot  
for Figure S5C

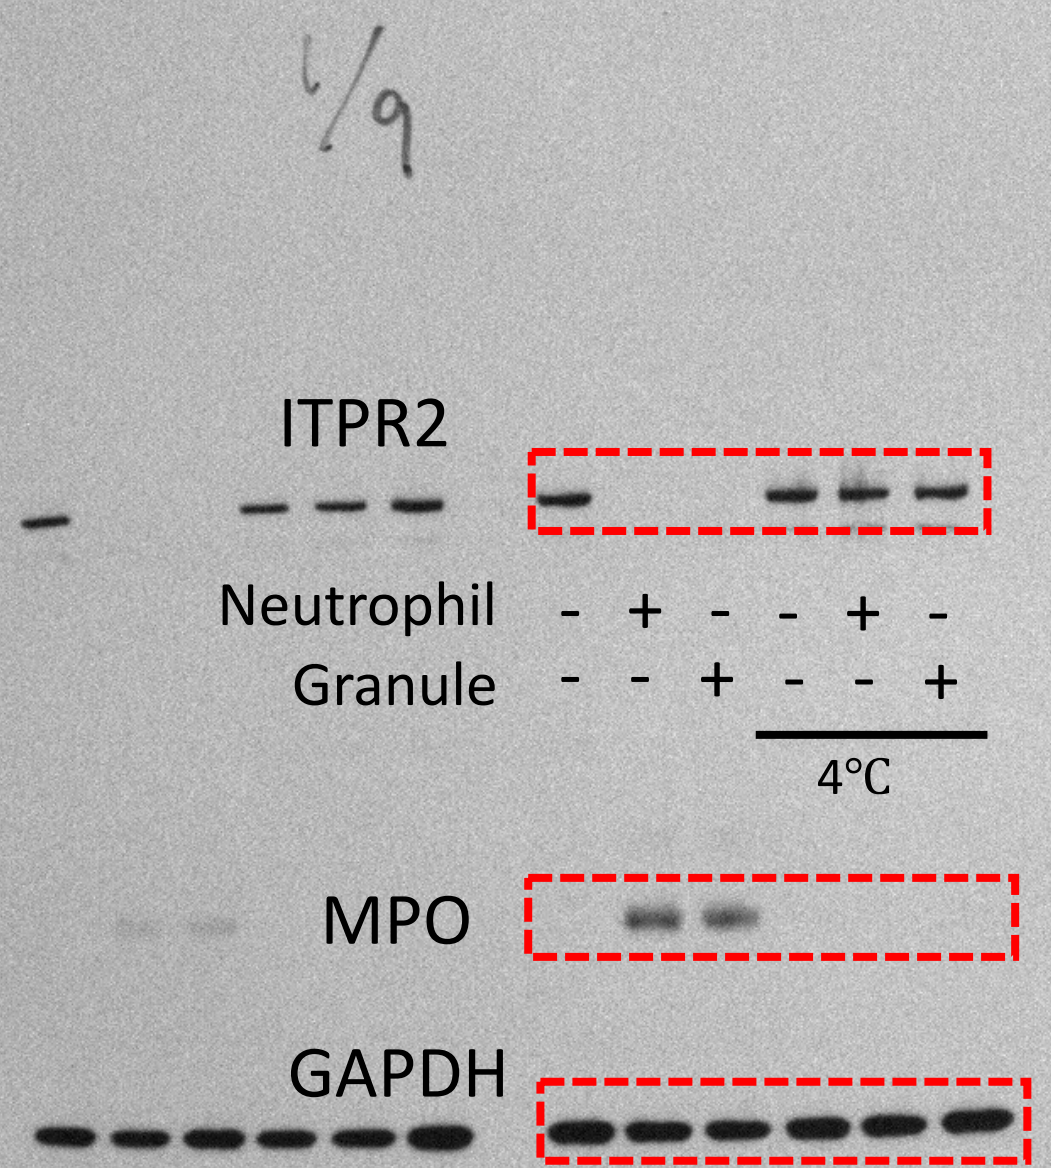

Full unedited blot  
for Figure 6E

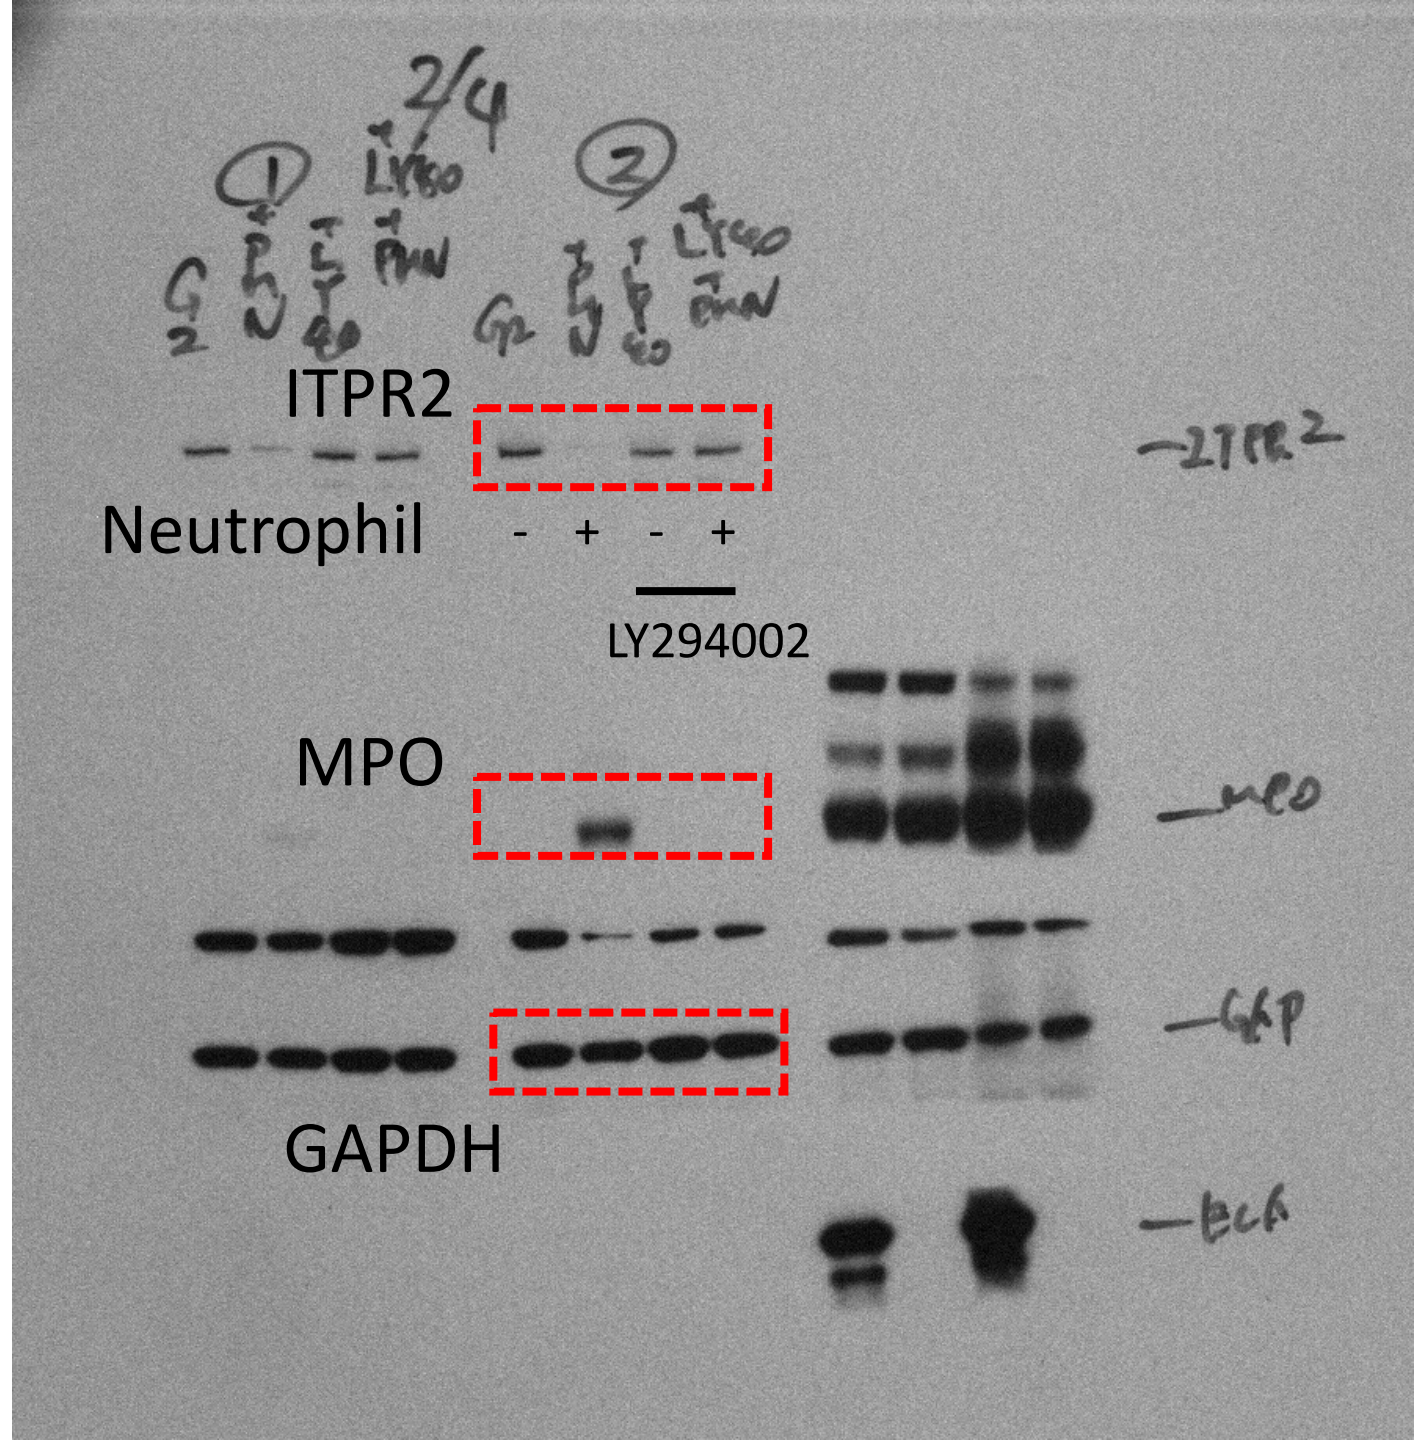



Full unedited blot  
for Figure S6C

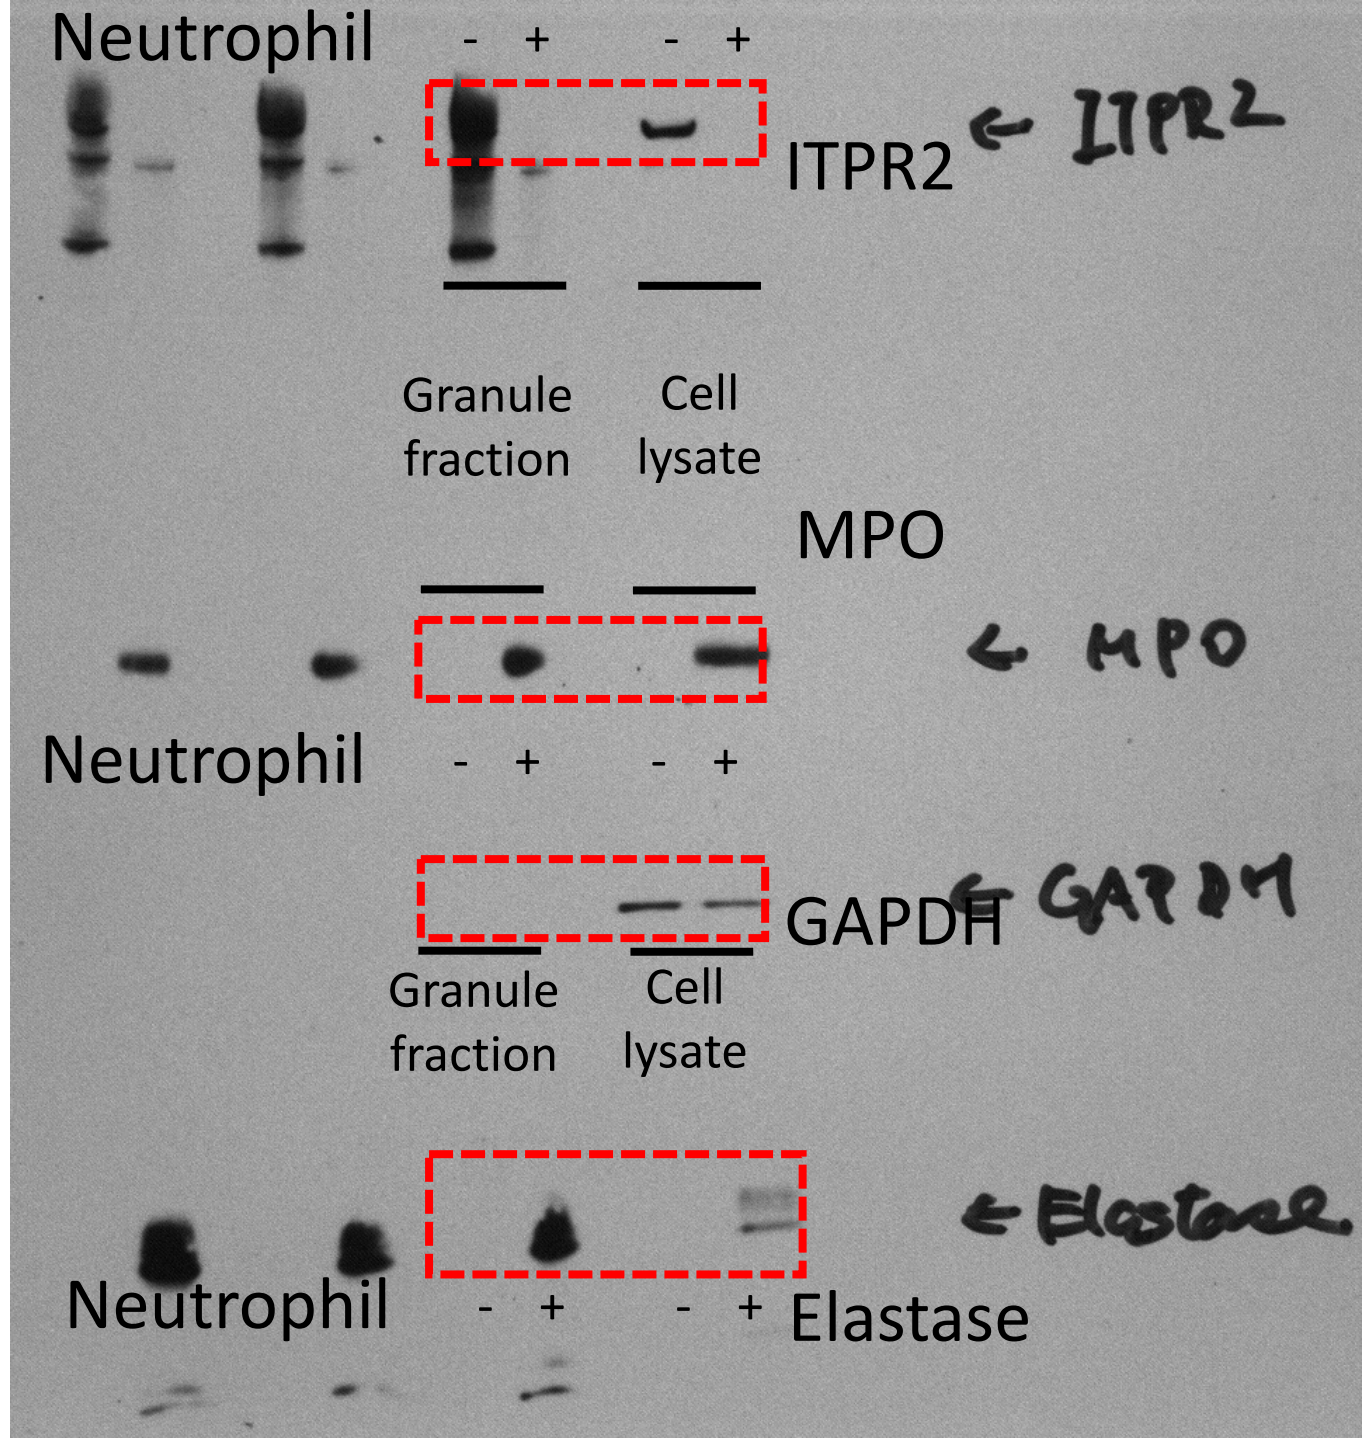

Full unedited blot  
for Figure S6D

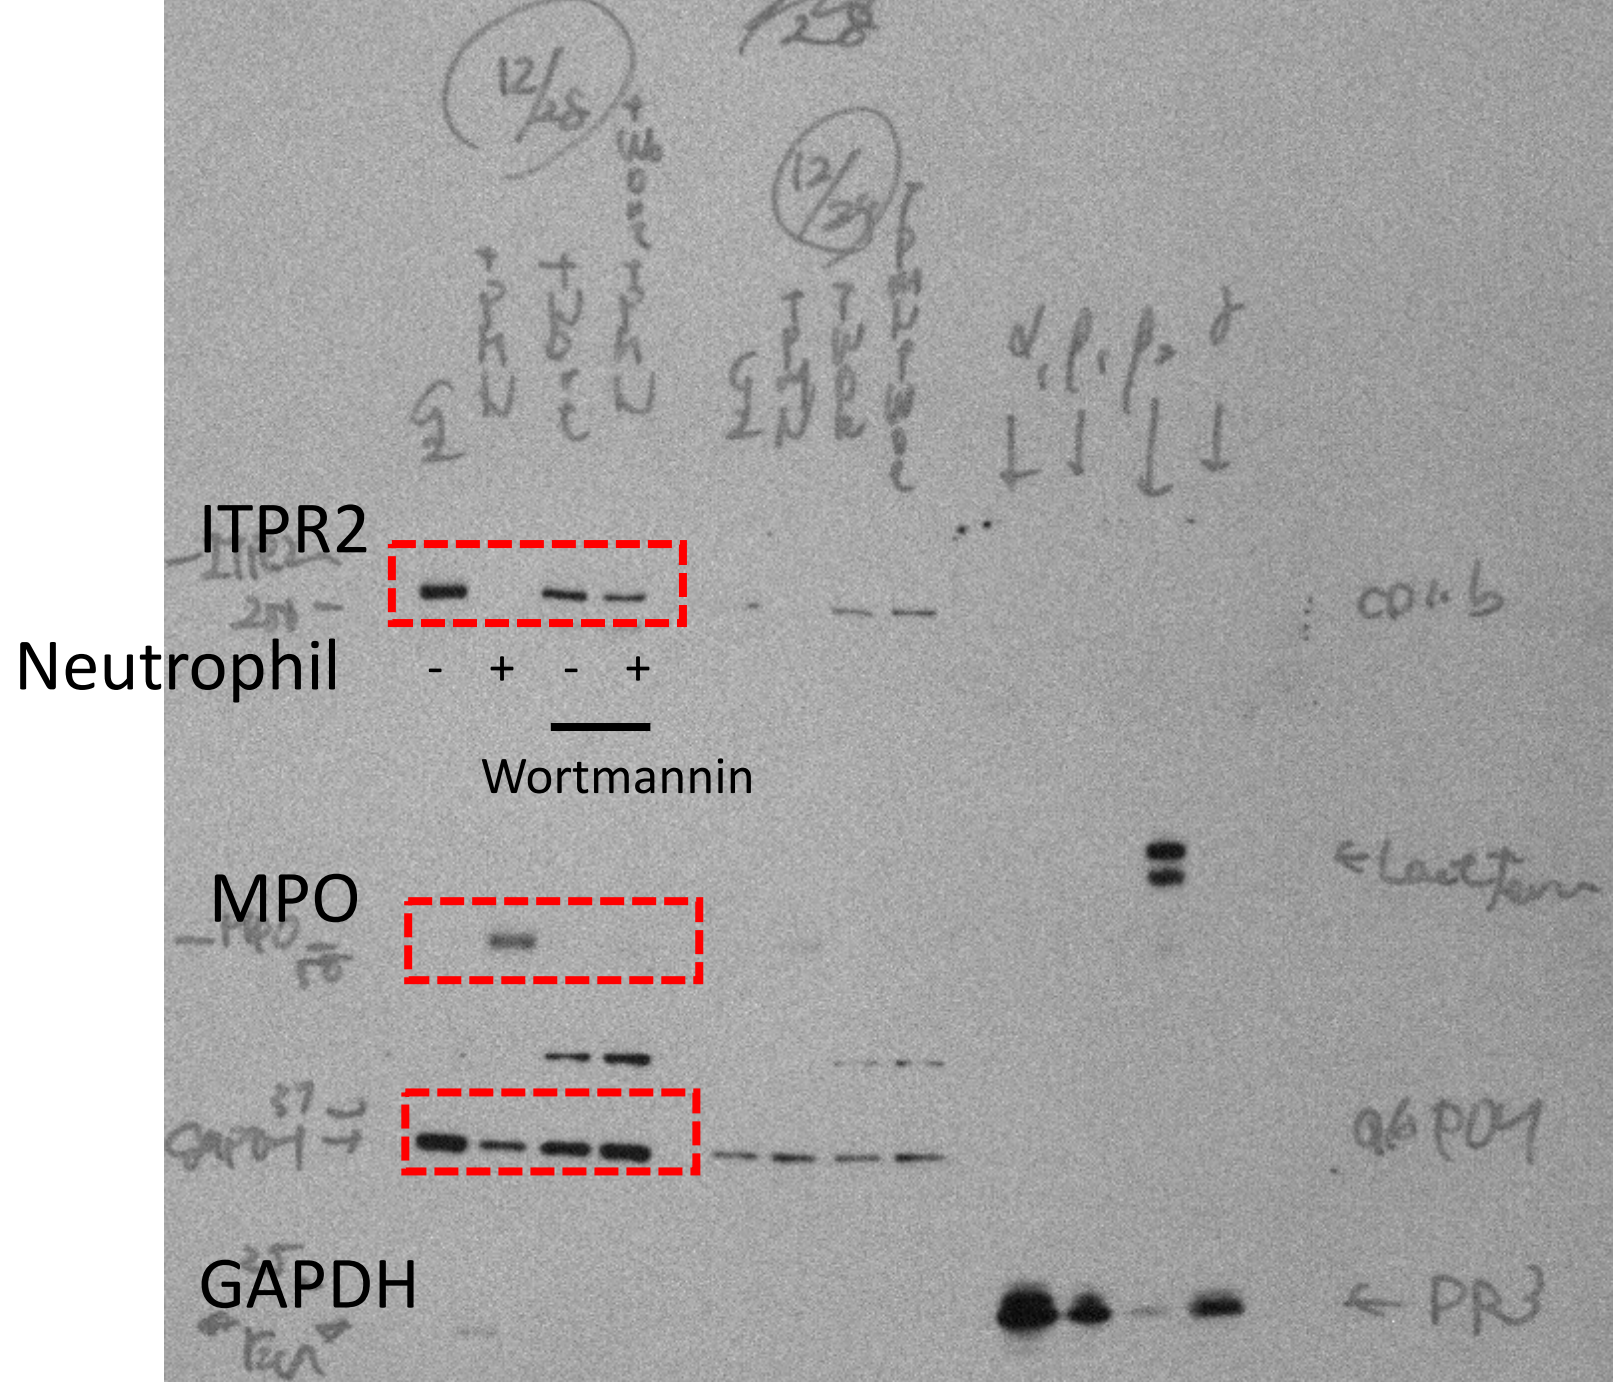

Full unedited blot  
for Figure S6J

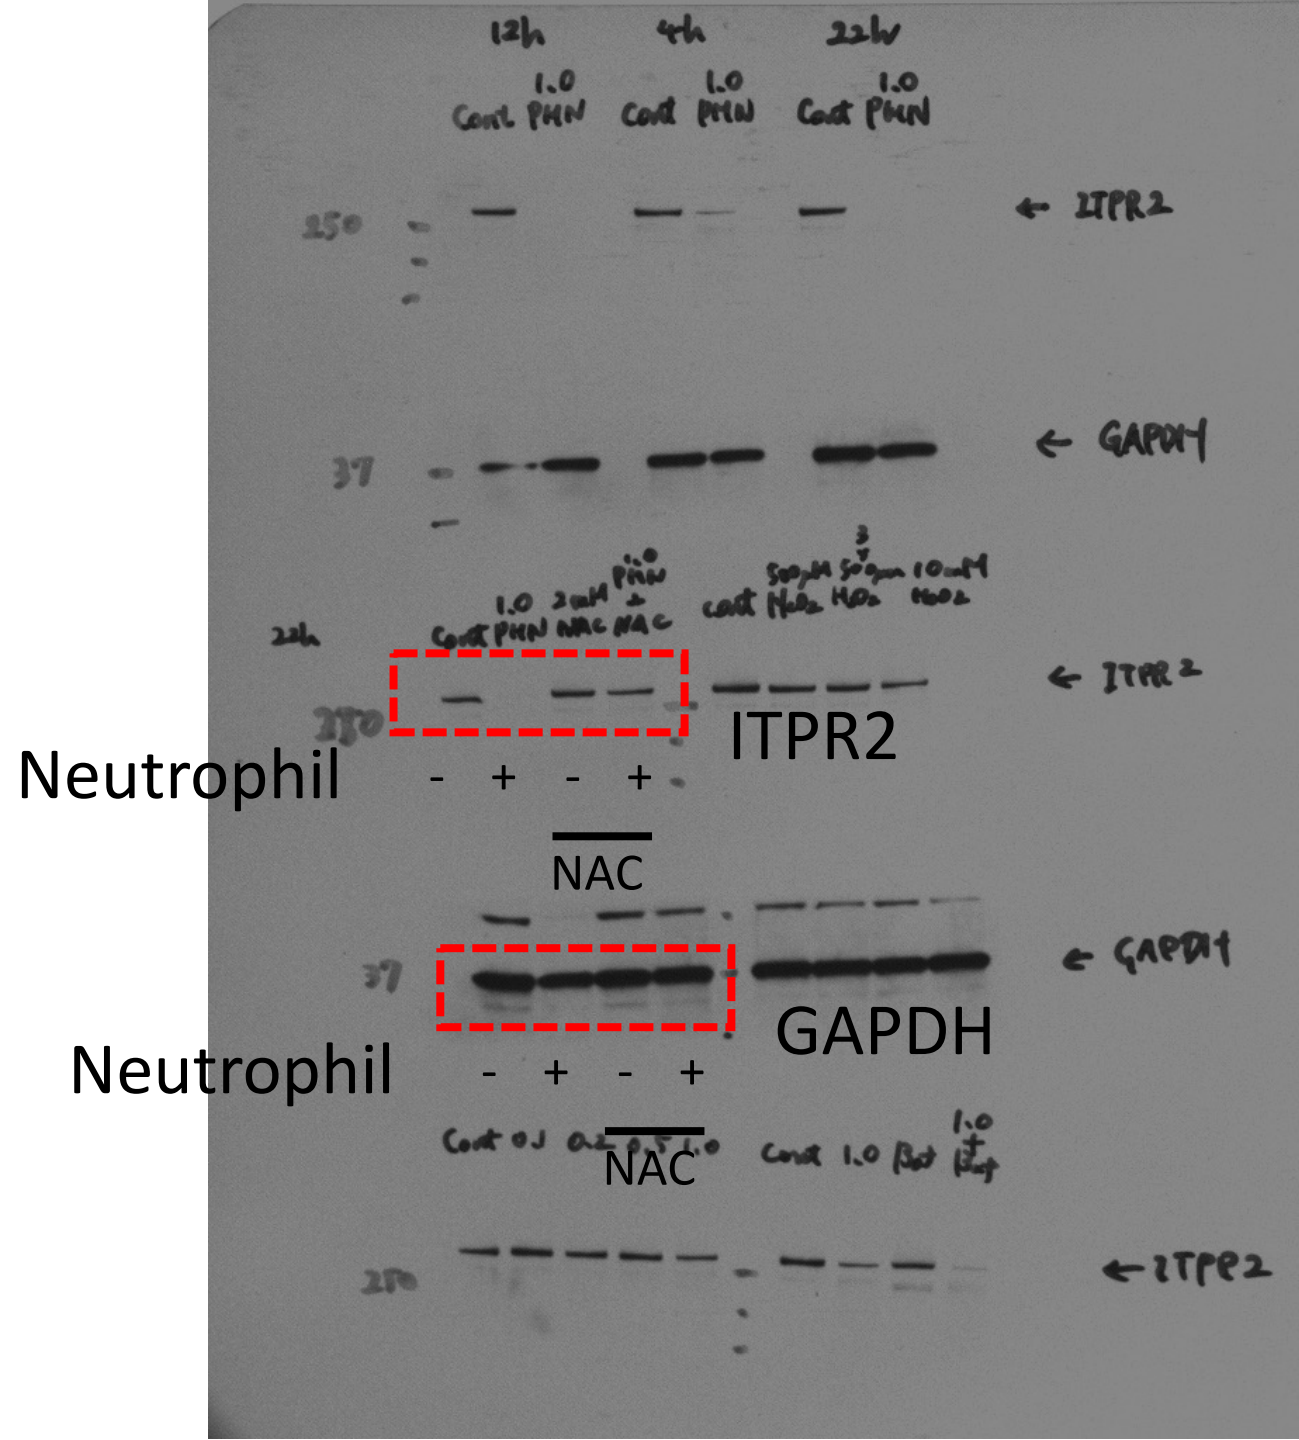





Full unedited blot  
for Figure 7C

3/8

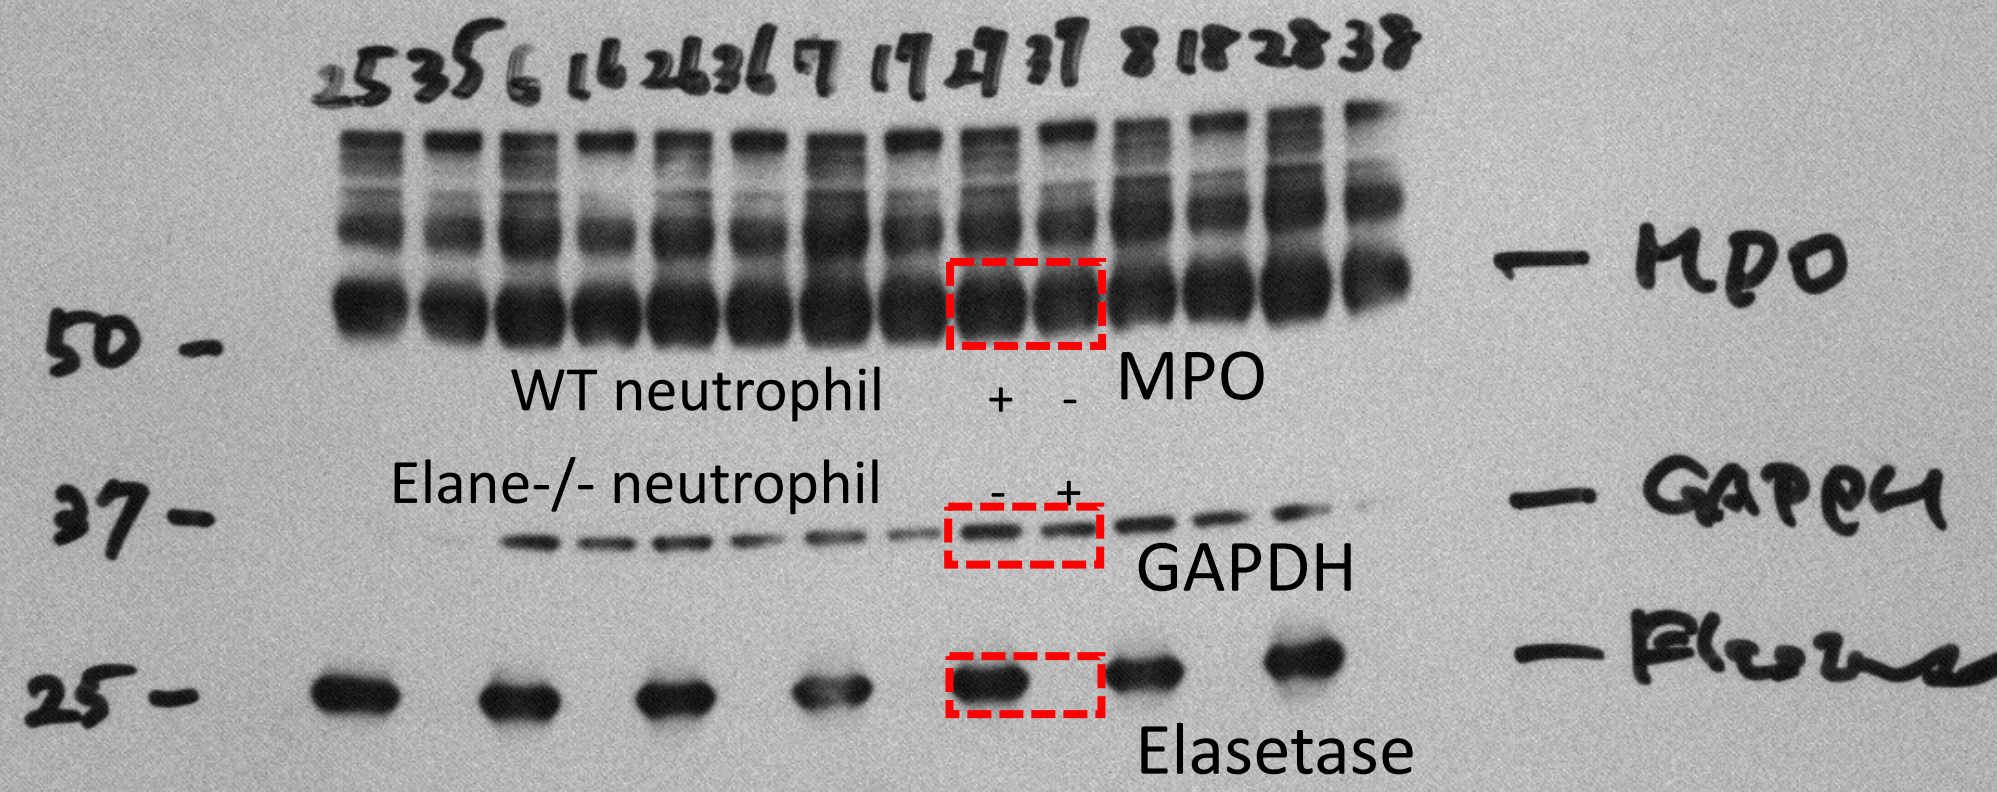

Full unedited blot  
for Figure 7D

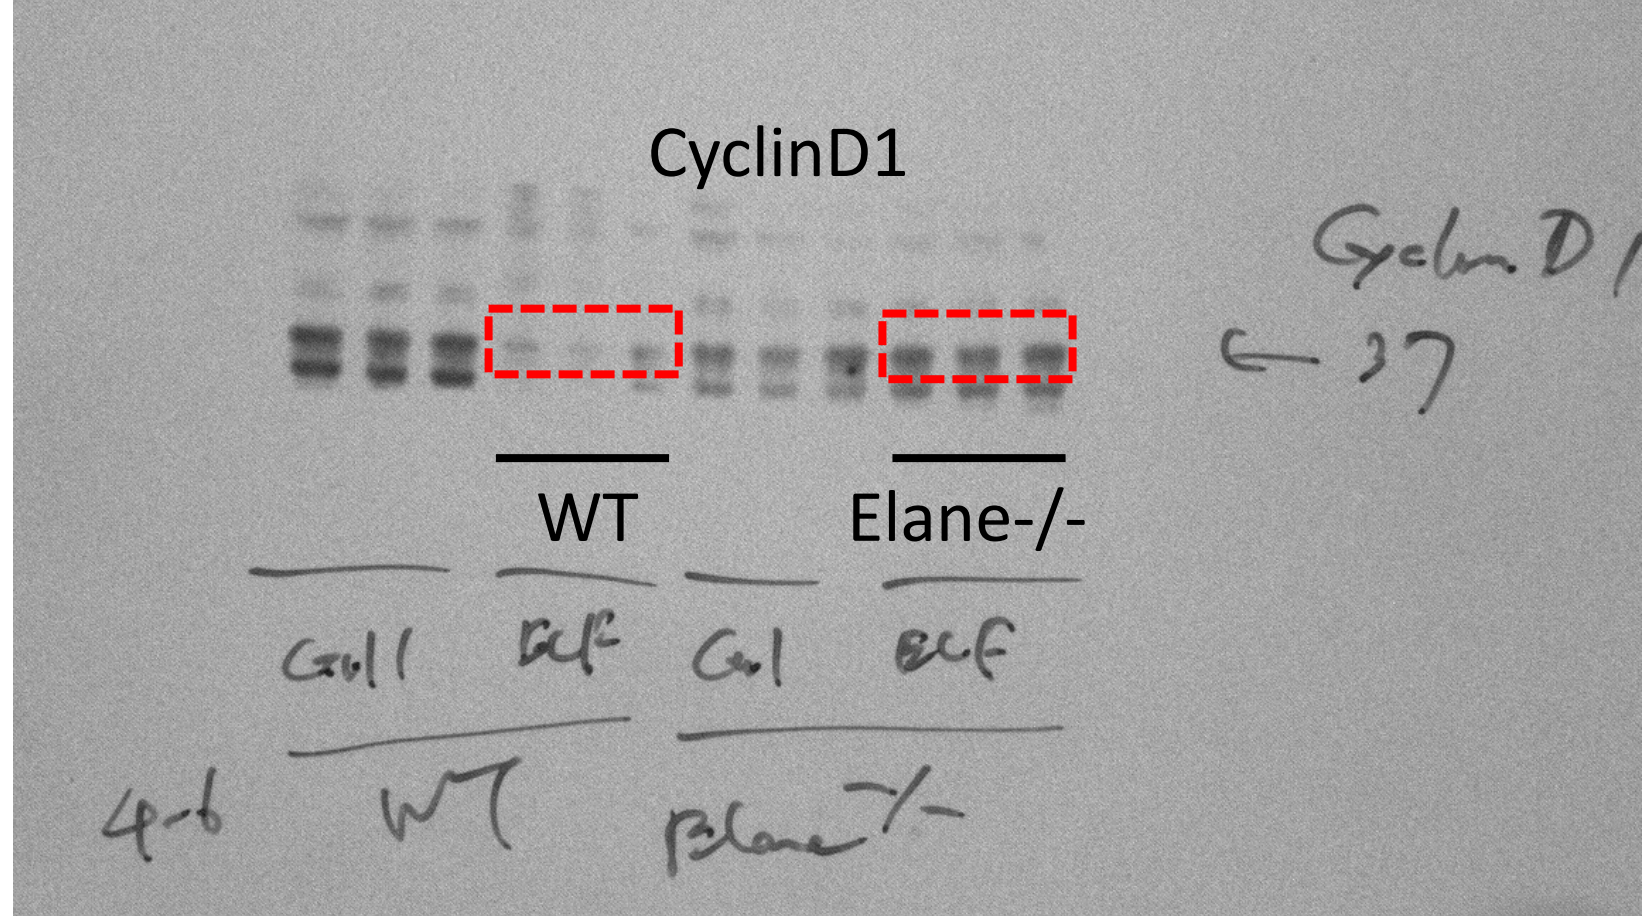

Full unedited blot  
for Figure 7D

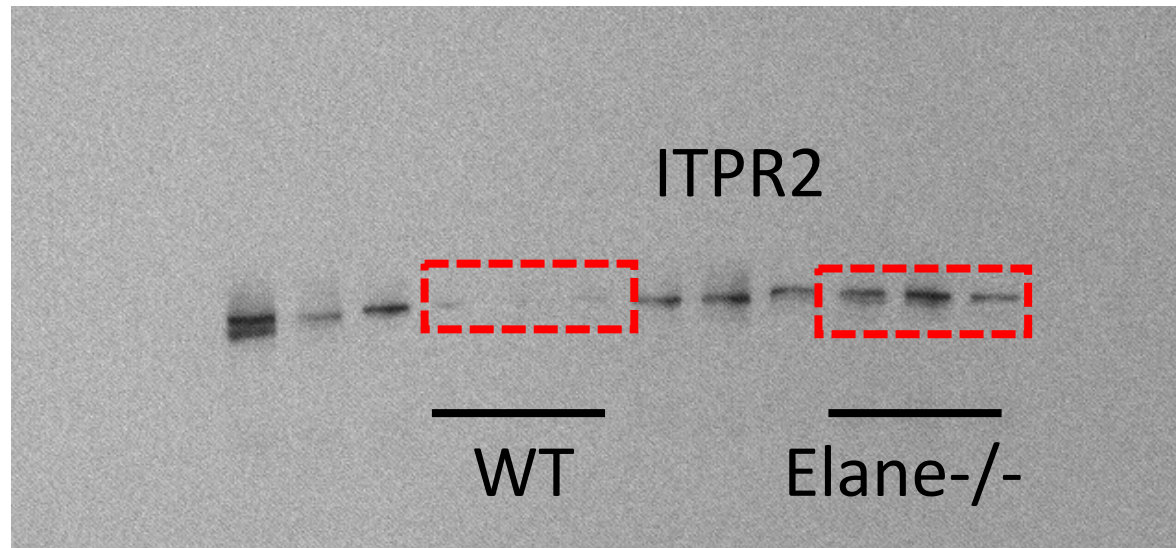



Full unedited blot  
for Figure 7D

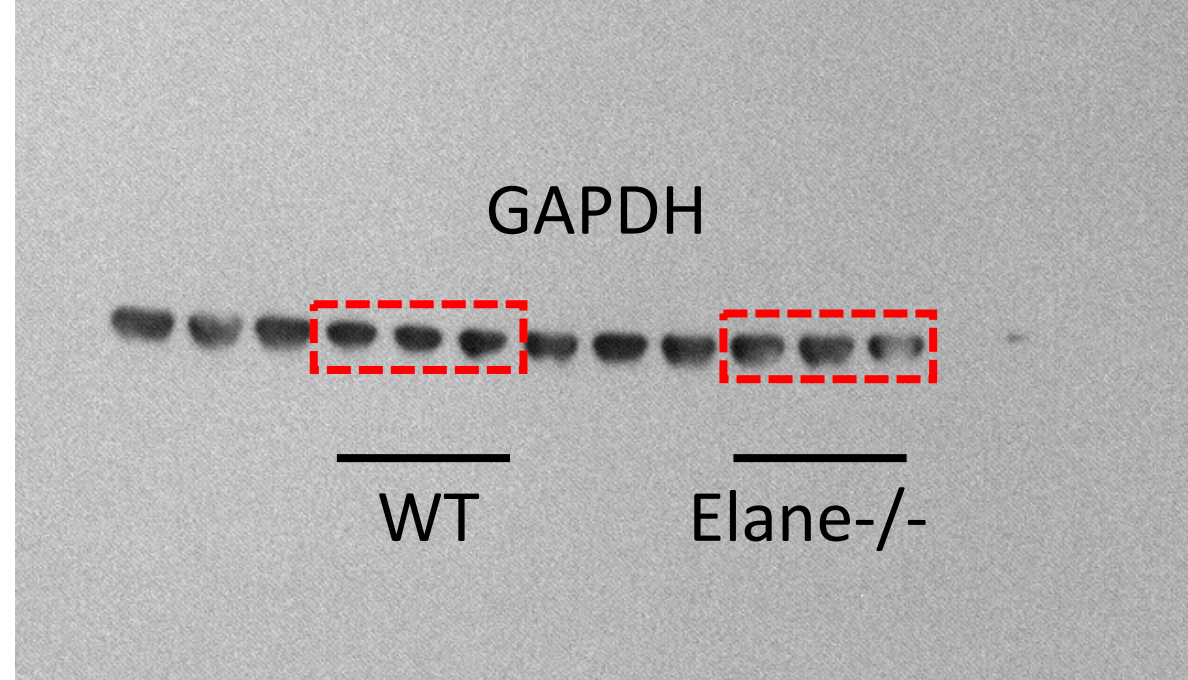



Full unedited blot  
for Figure 7I

WT 1 2 3 4 5 6 7      KO 1 2 3 4 5

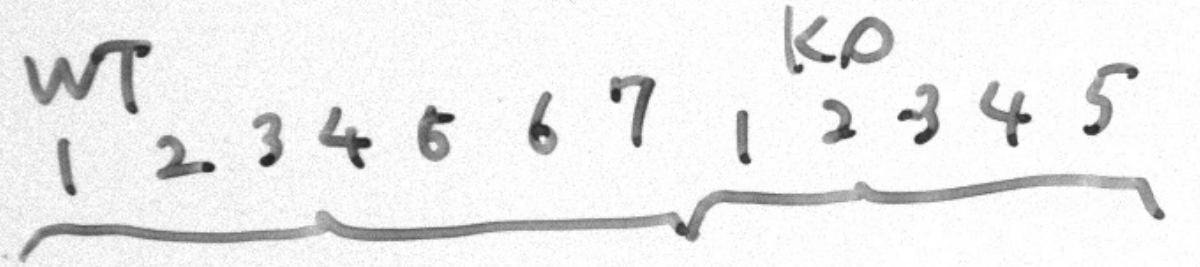

WT      ITPR2-/-

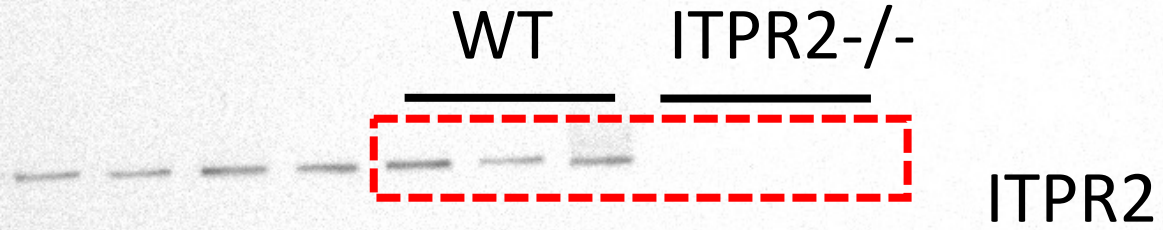

ITPR2

— ITPR2

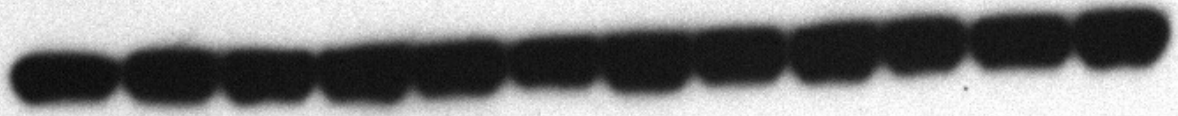

— GAPDH

Full unedited blot  
for Figure 7I

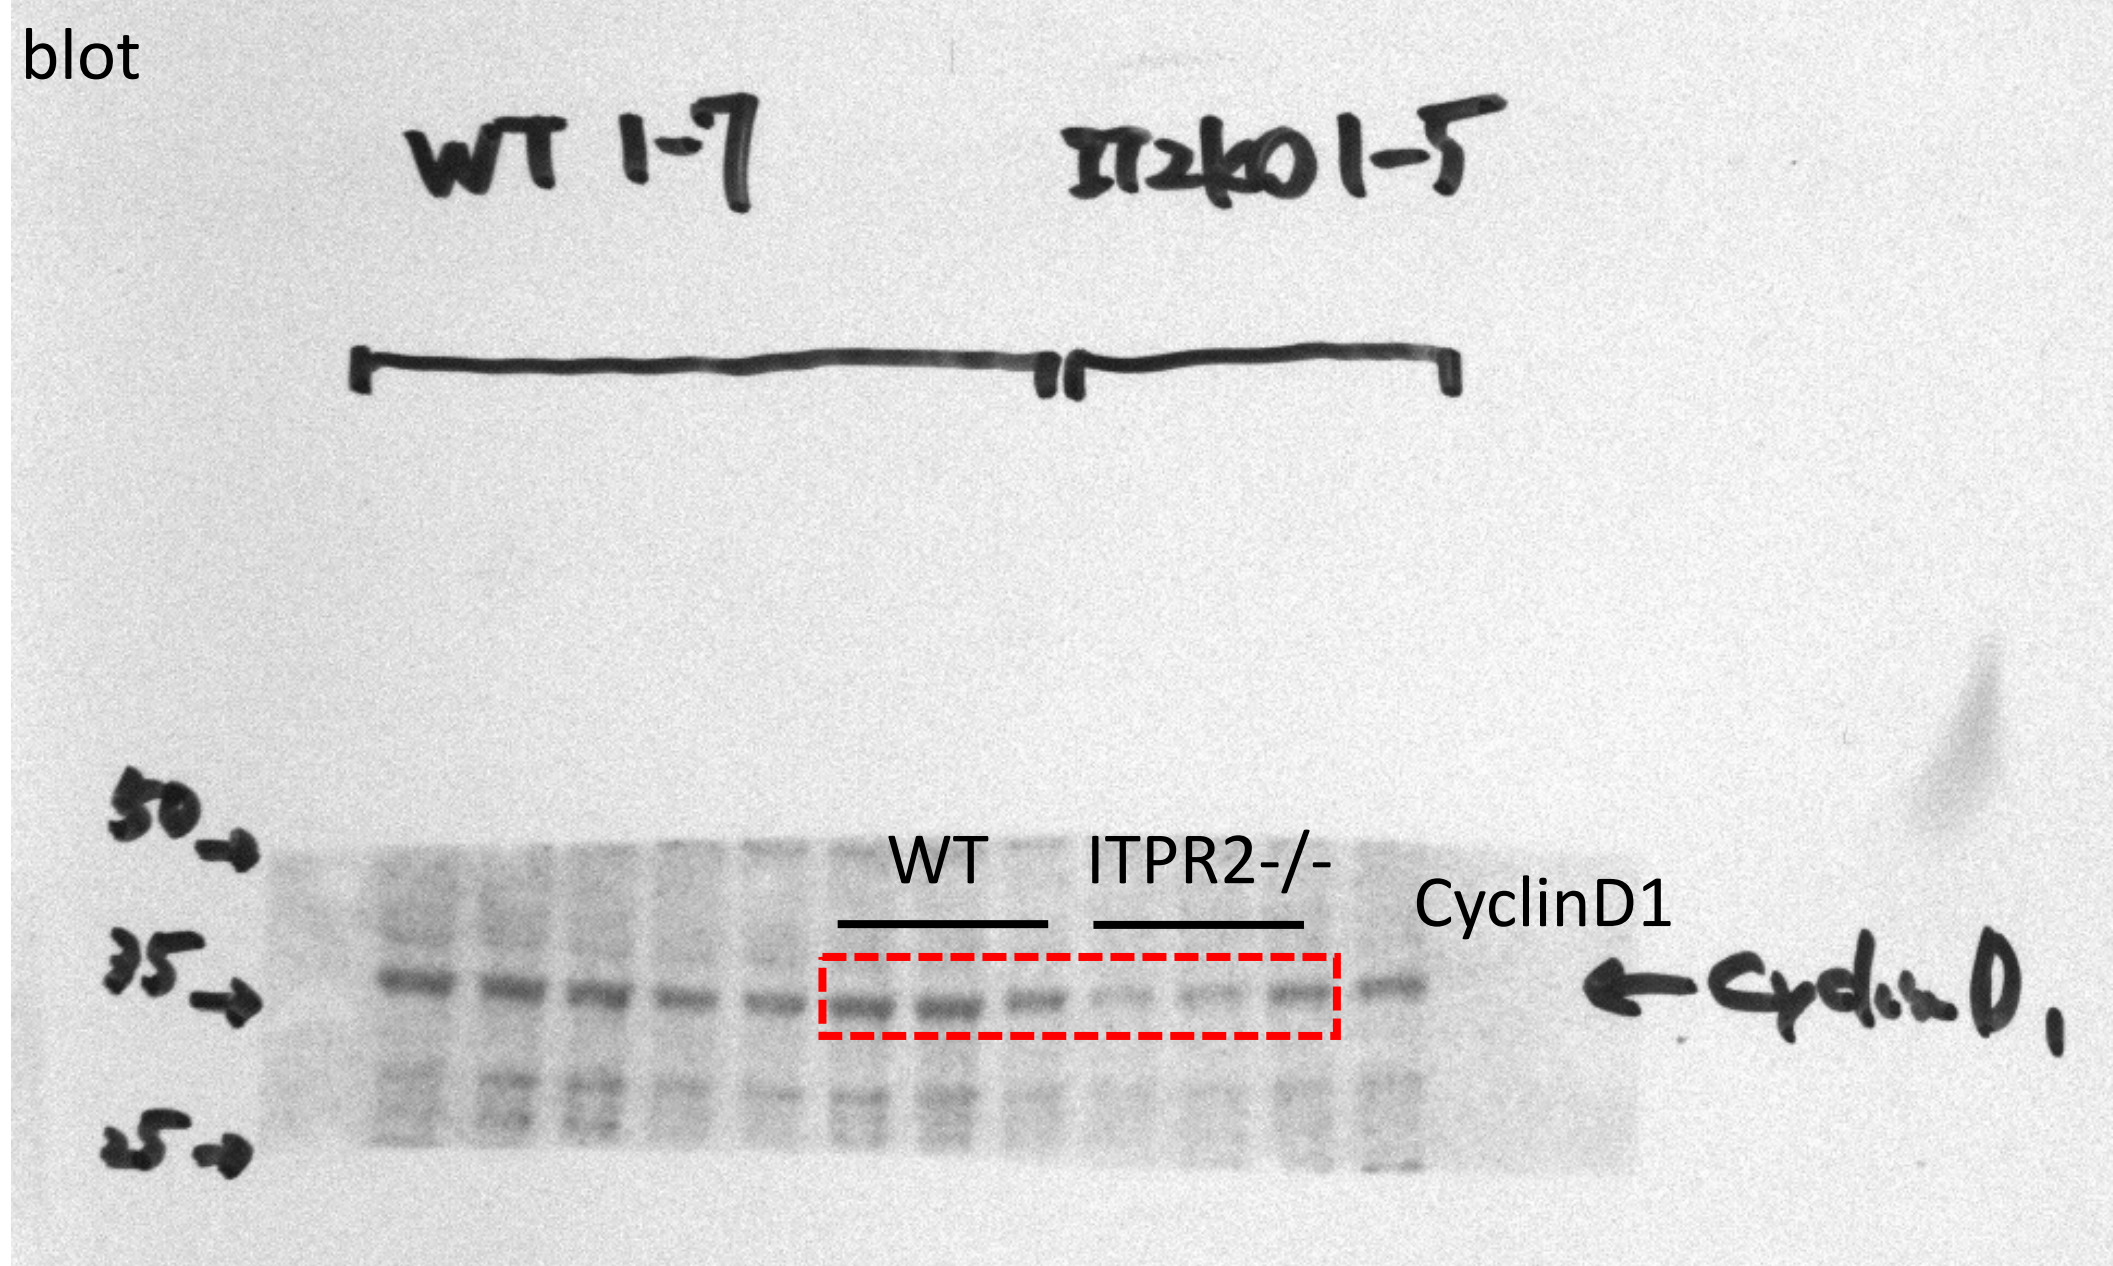

Full unedited blot  
for Figure 71

10/31 <sup>10/29</sup> CyC(linD)1 (Rob)  
↓  
Strip  
↓  
GAPDH (mouse)

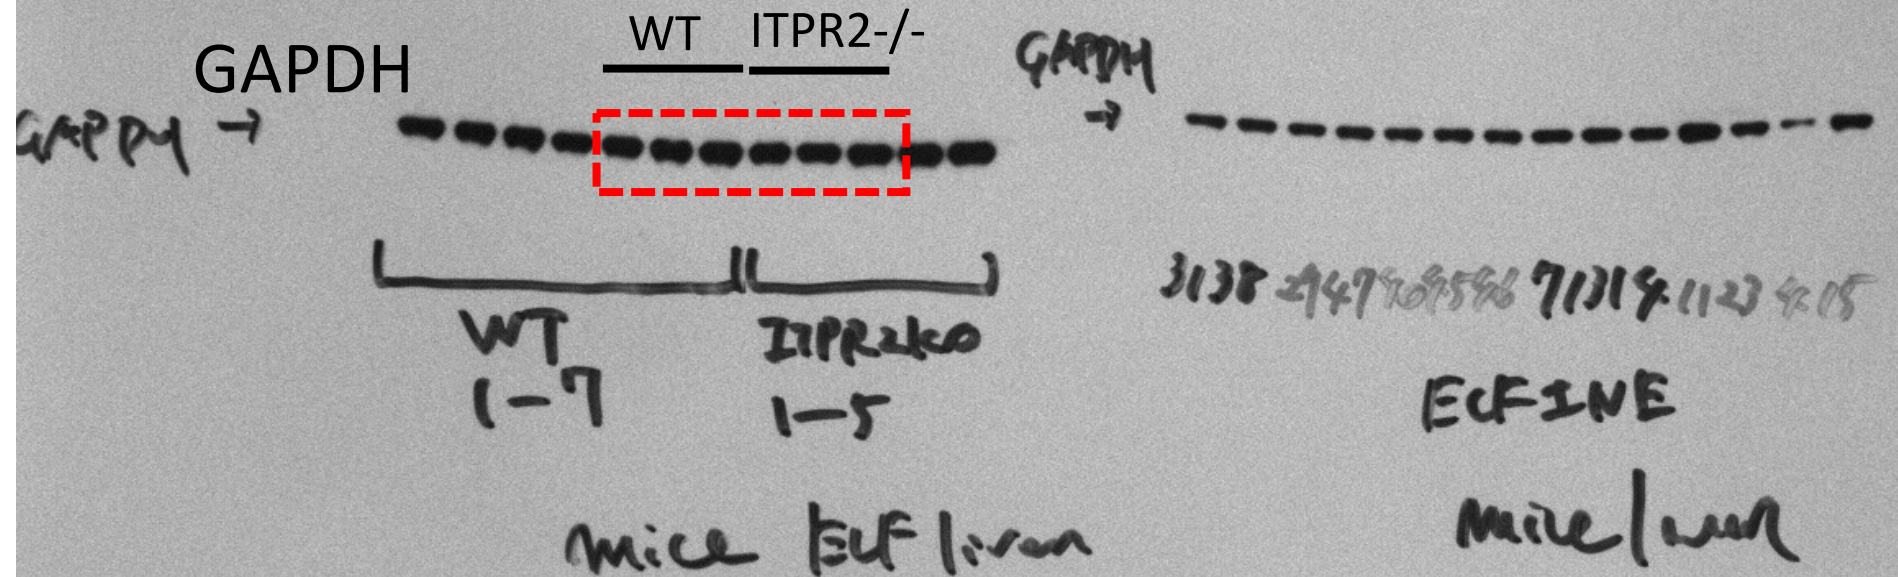

Full unedited blot  
for Figure S7A

1/6/23

Control 1-4   ELF 1-4

ITPR2

Control   ELF

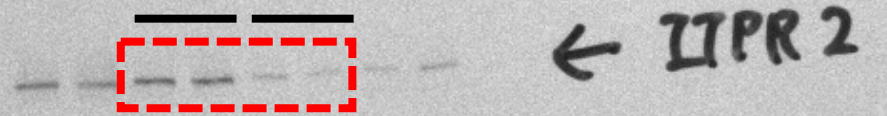

GAPDH

Control   ELF

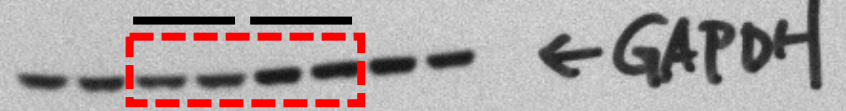

Full unedited blot  
for Figure S7G

06/10/22

ALC model - total Liver  
LySate

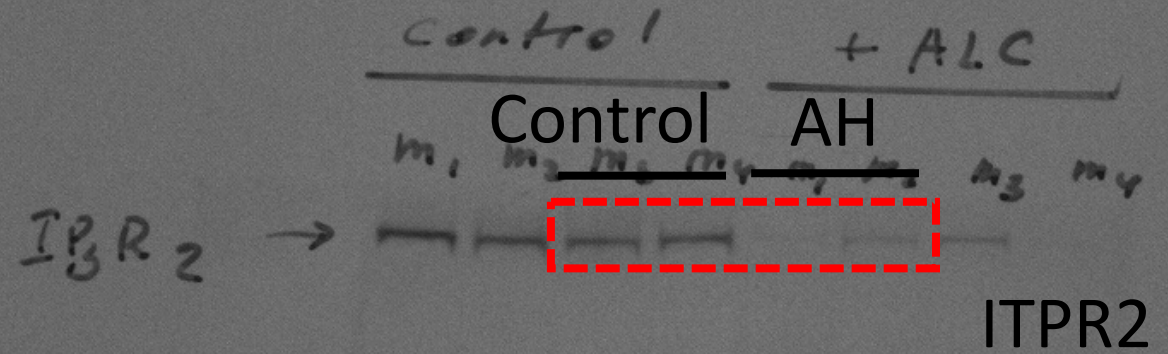

GAPDH →

Elastase →

↓

No Signal.

Full unedited blot  
for Figure S7G

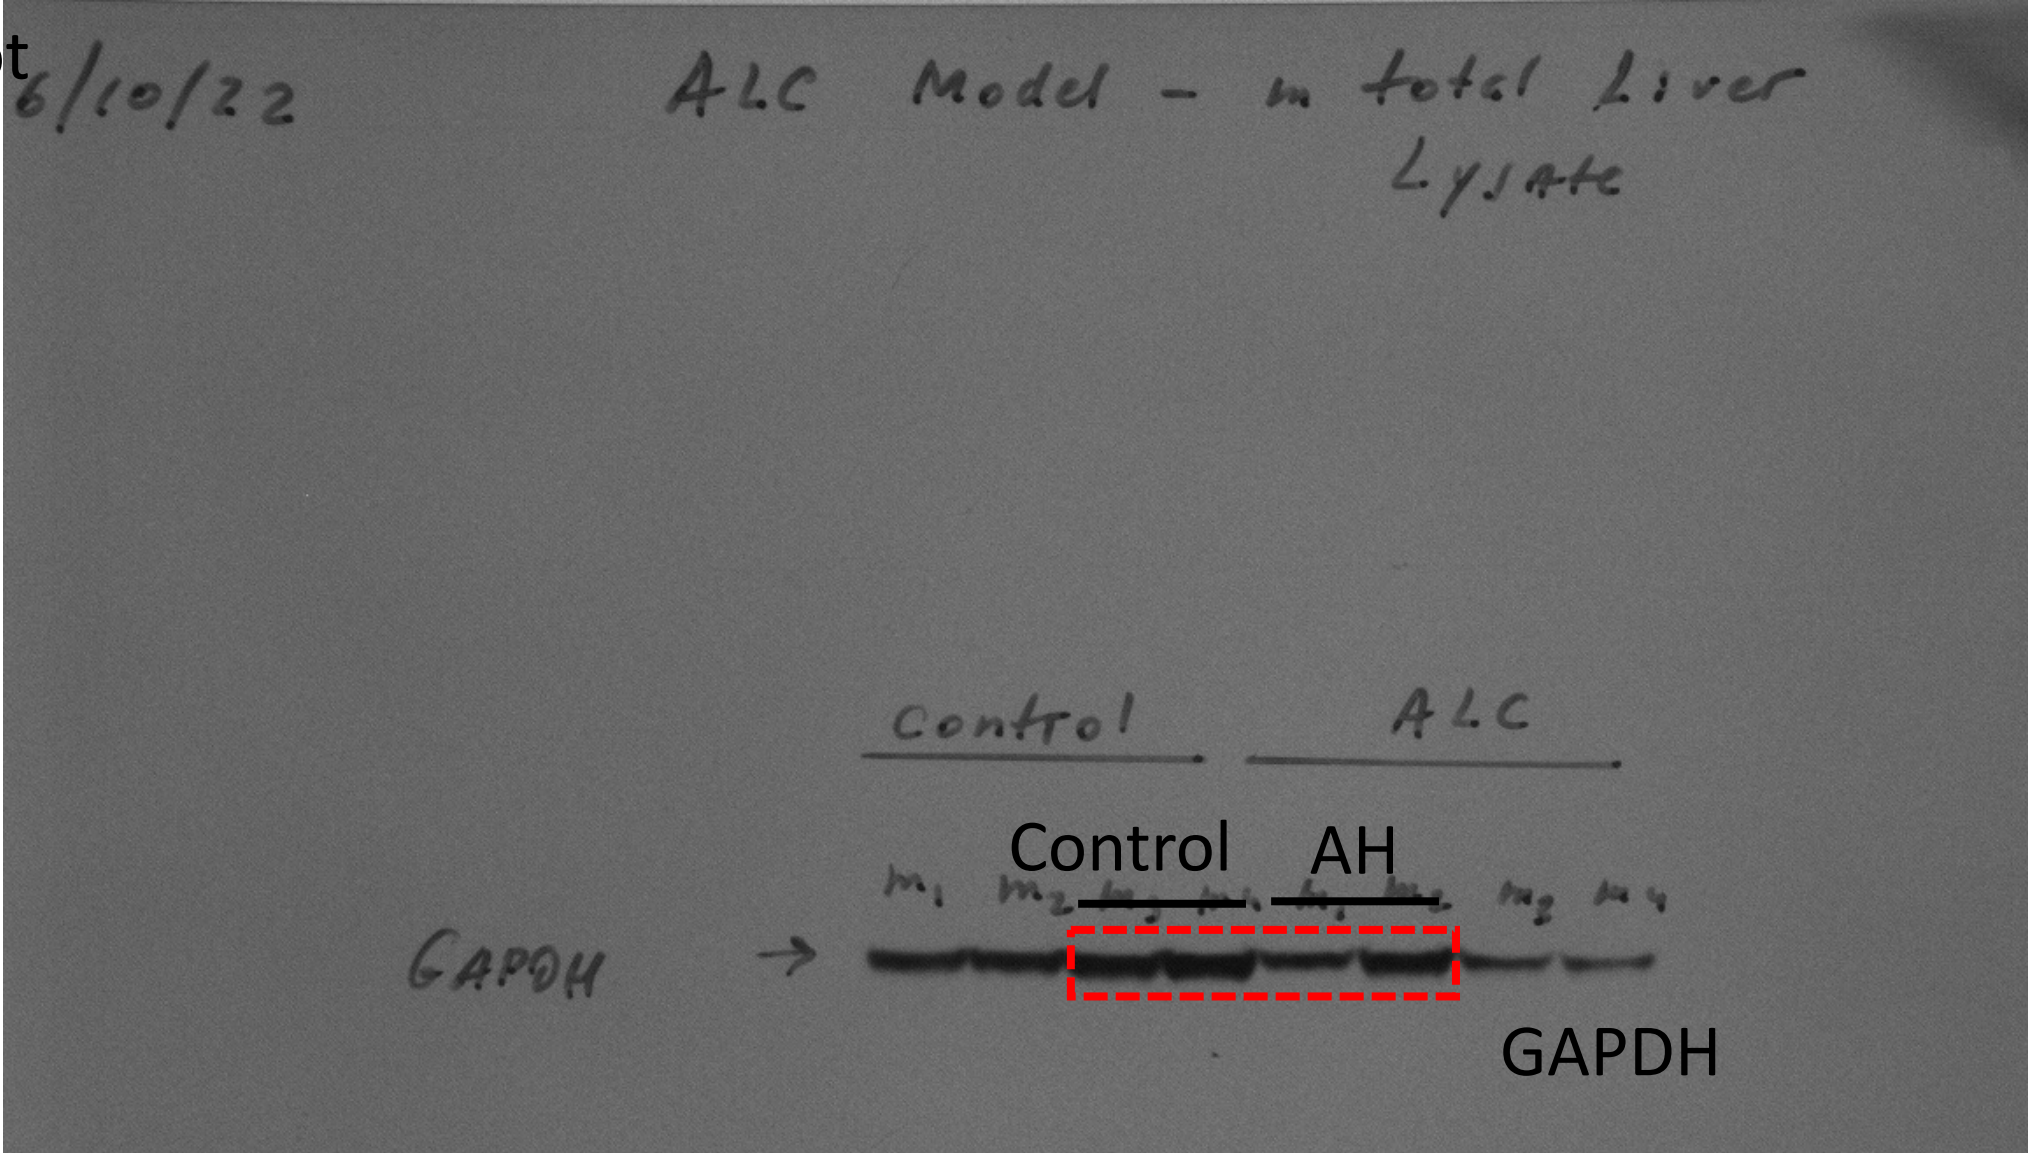



Full unedited blot  
for Figure S7N

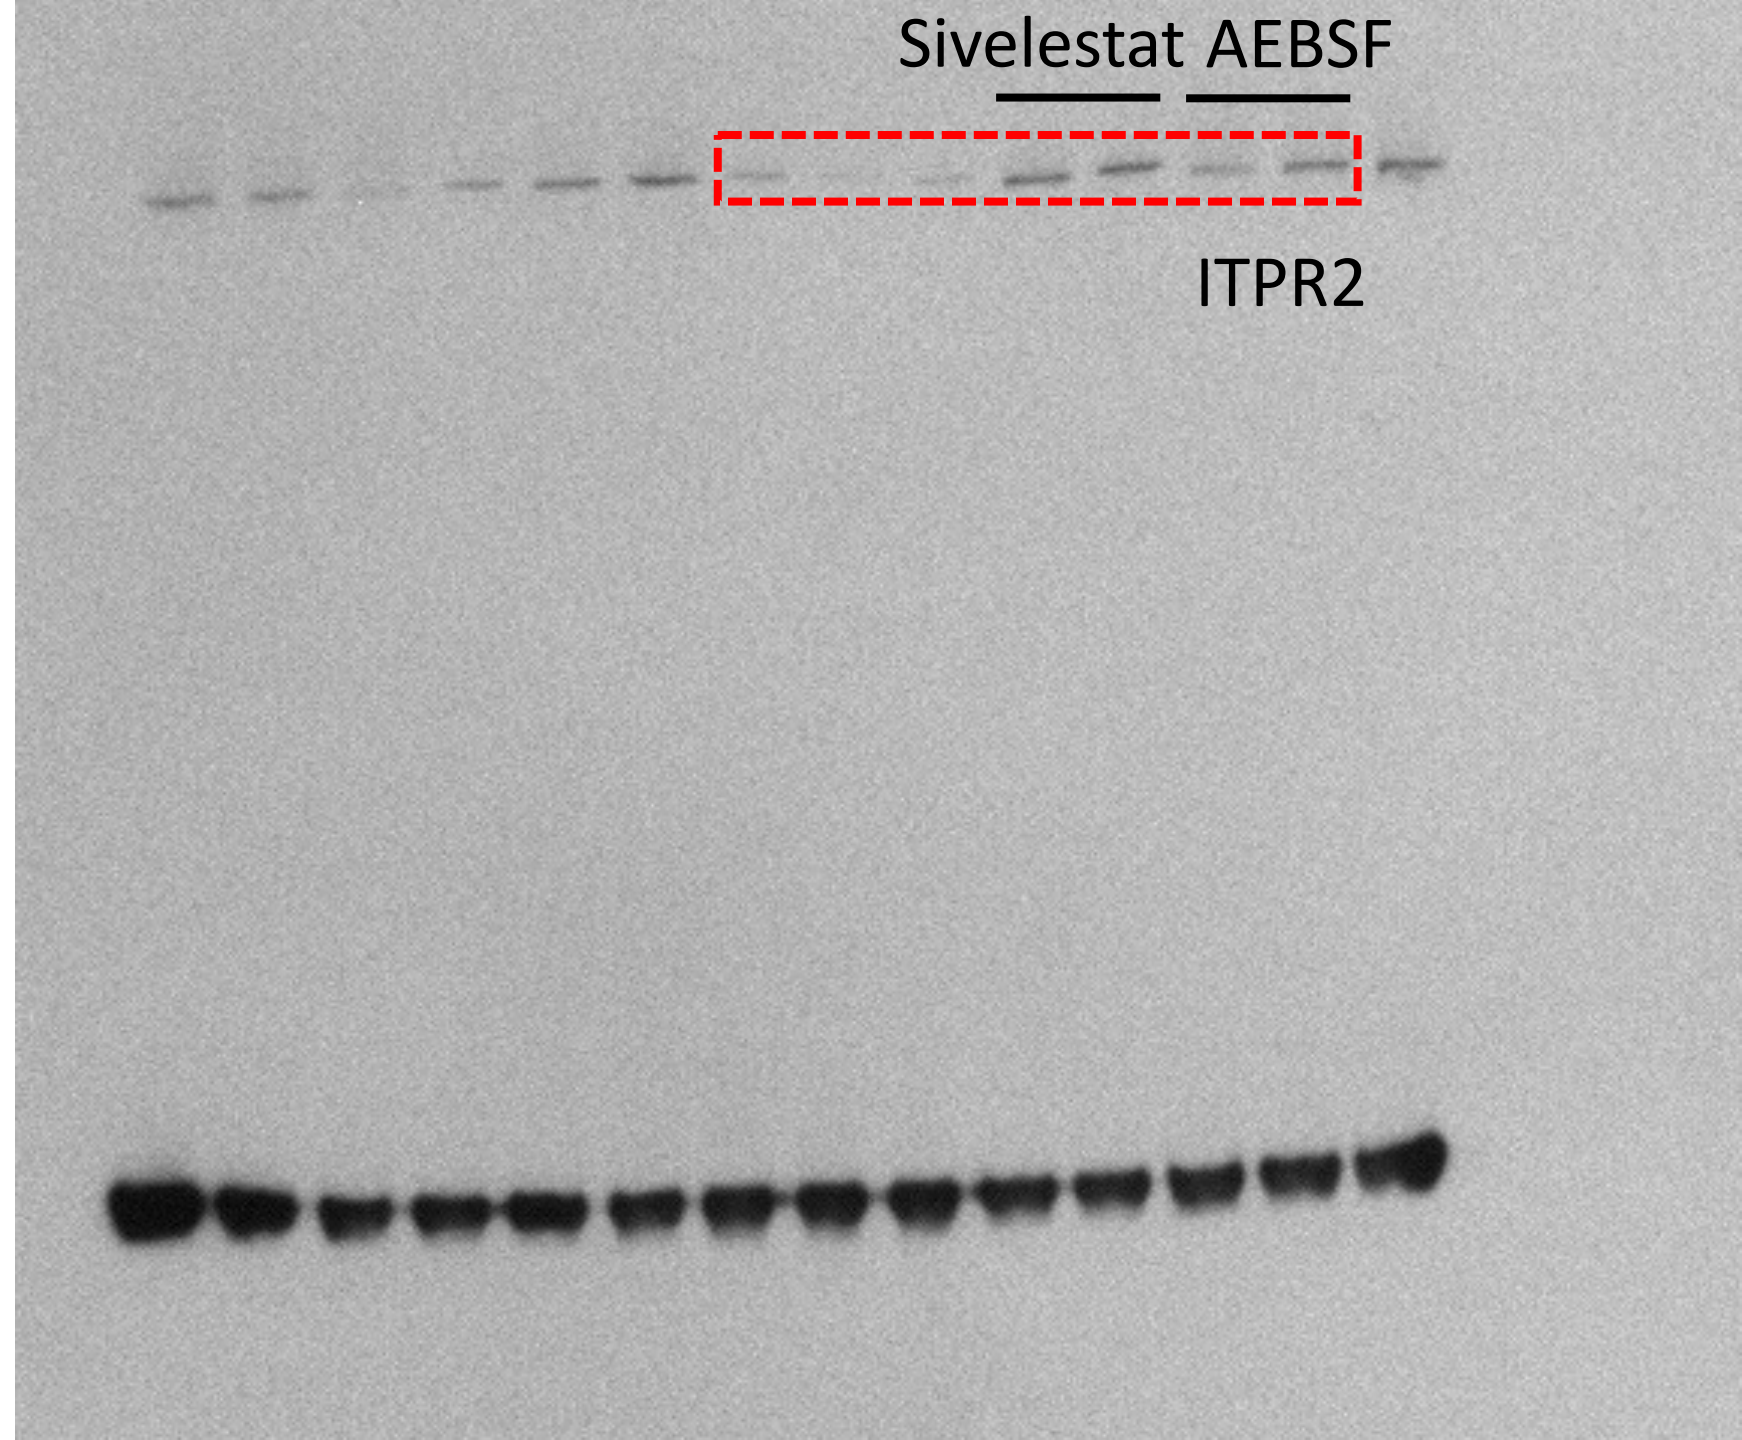

Full unedited blot  
for Figure S7N

10/31

ELF 1 NE

32 37 35 36 38 39 8 13 14 11 12 10 15 21

50 →  
37 →  
25 →

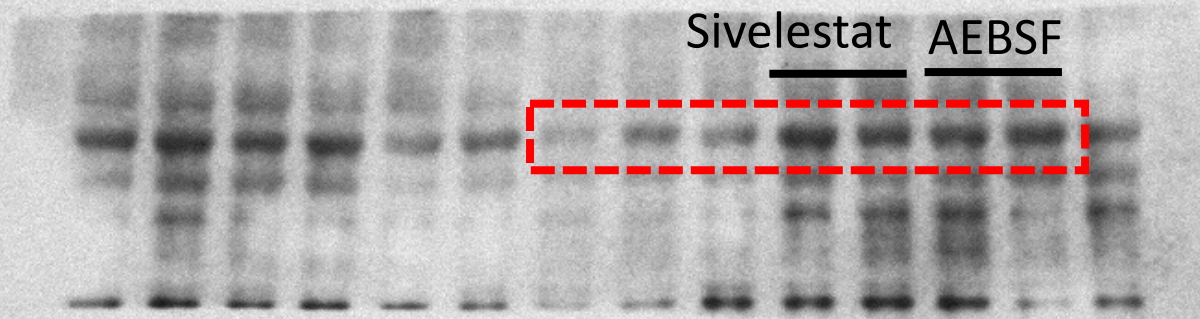

Sivelestat AEBSF

CyclinD1  
← cyclin D1

Full unedited blot  
for Figure S7N

11/1

10/31 cyclin D1 (Rln)  
↓  
strip  
↓  
GAPDH (mouse)

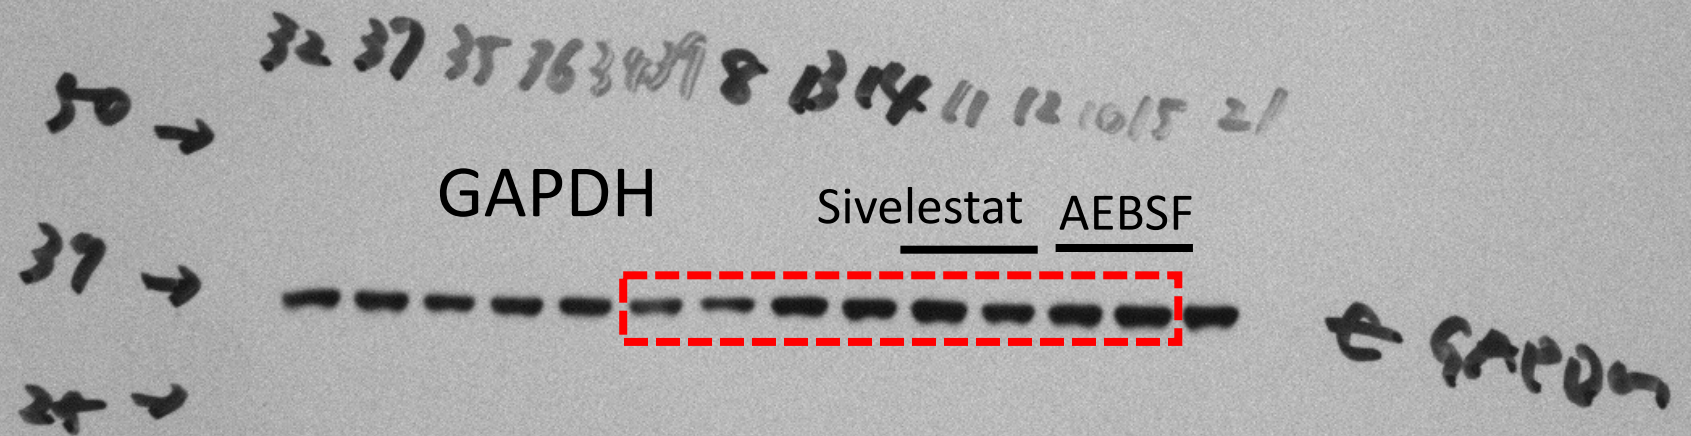

Full unedited blot  
for Figure 8

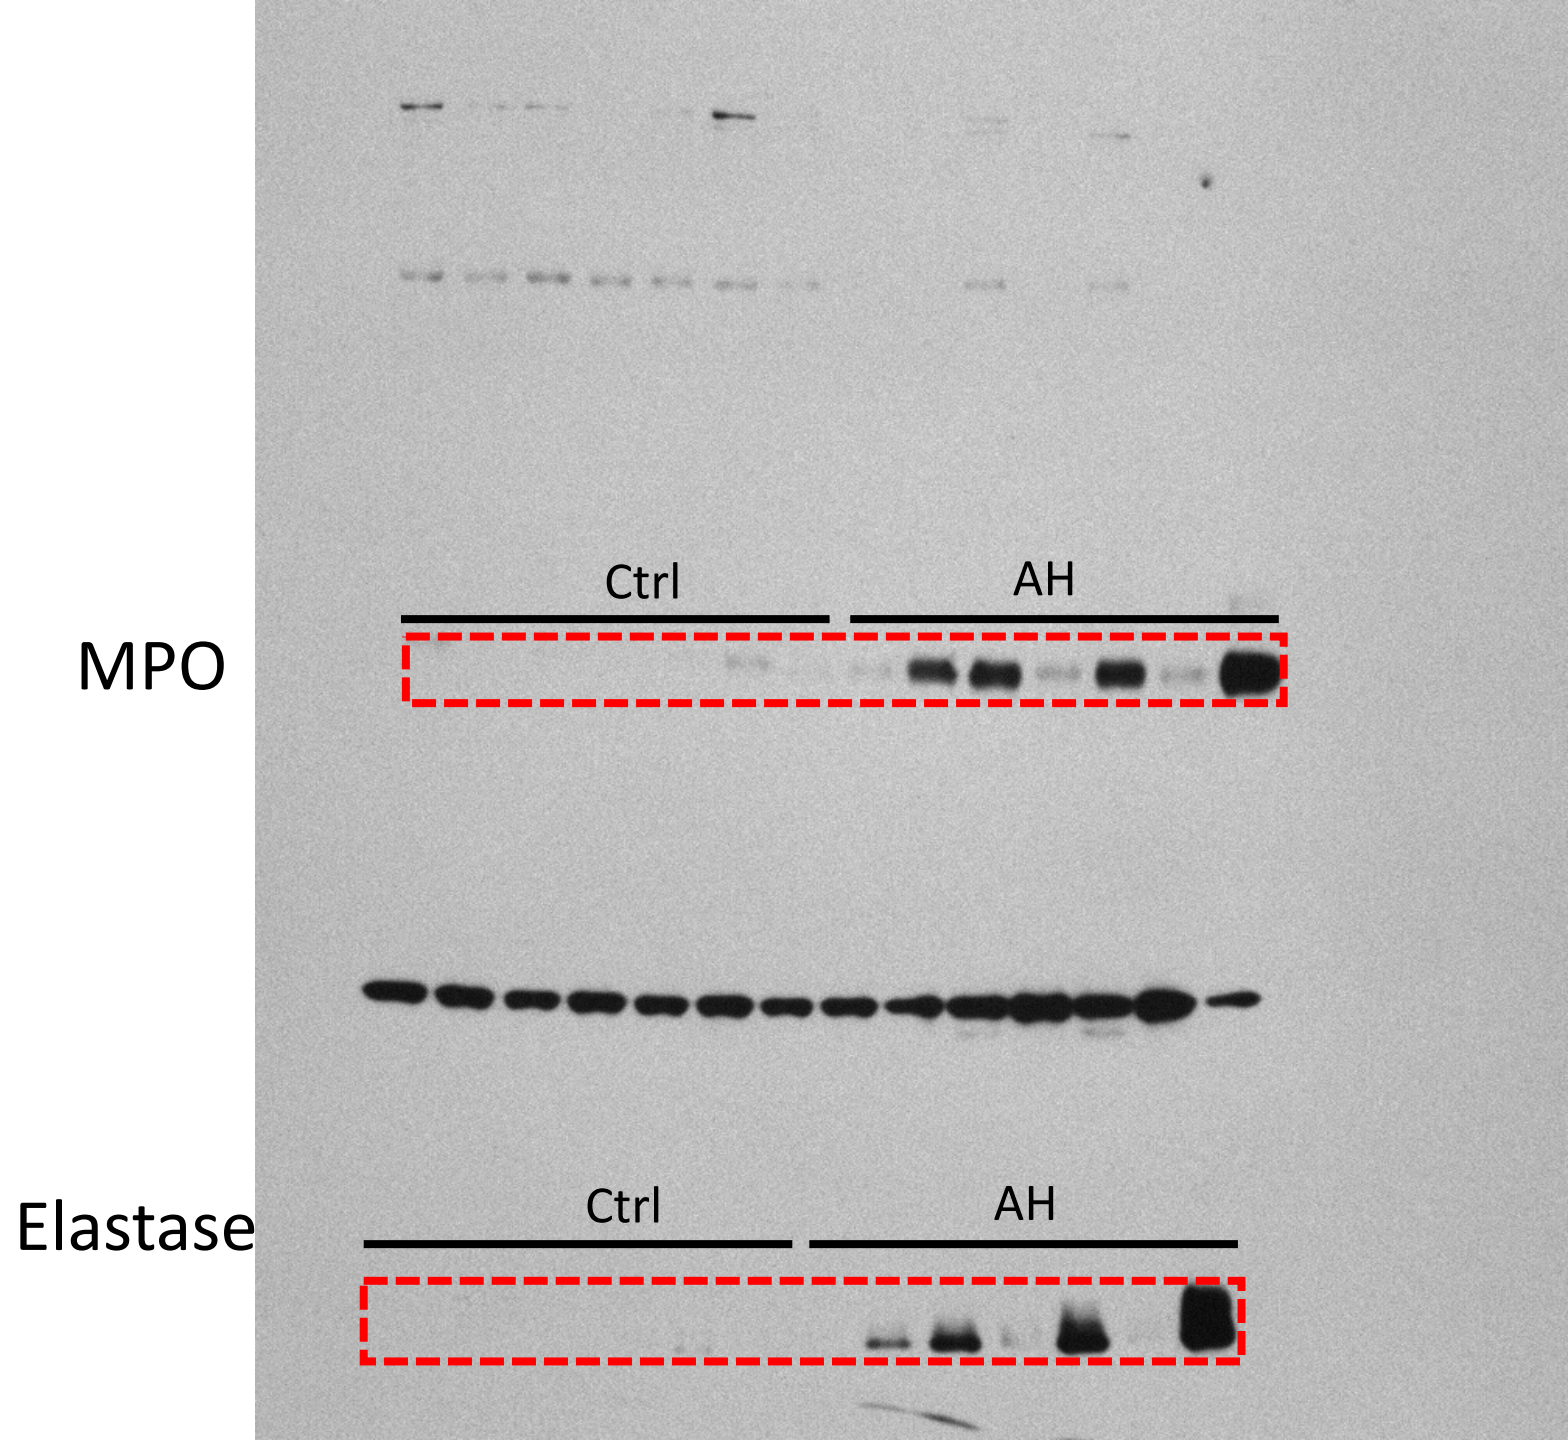

Full unedited blot  
for Figure 8

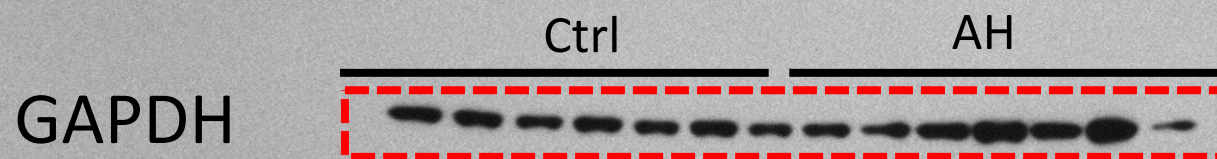

Full unedited blot  
for Figure 8

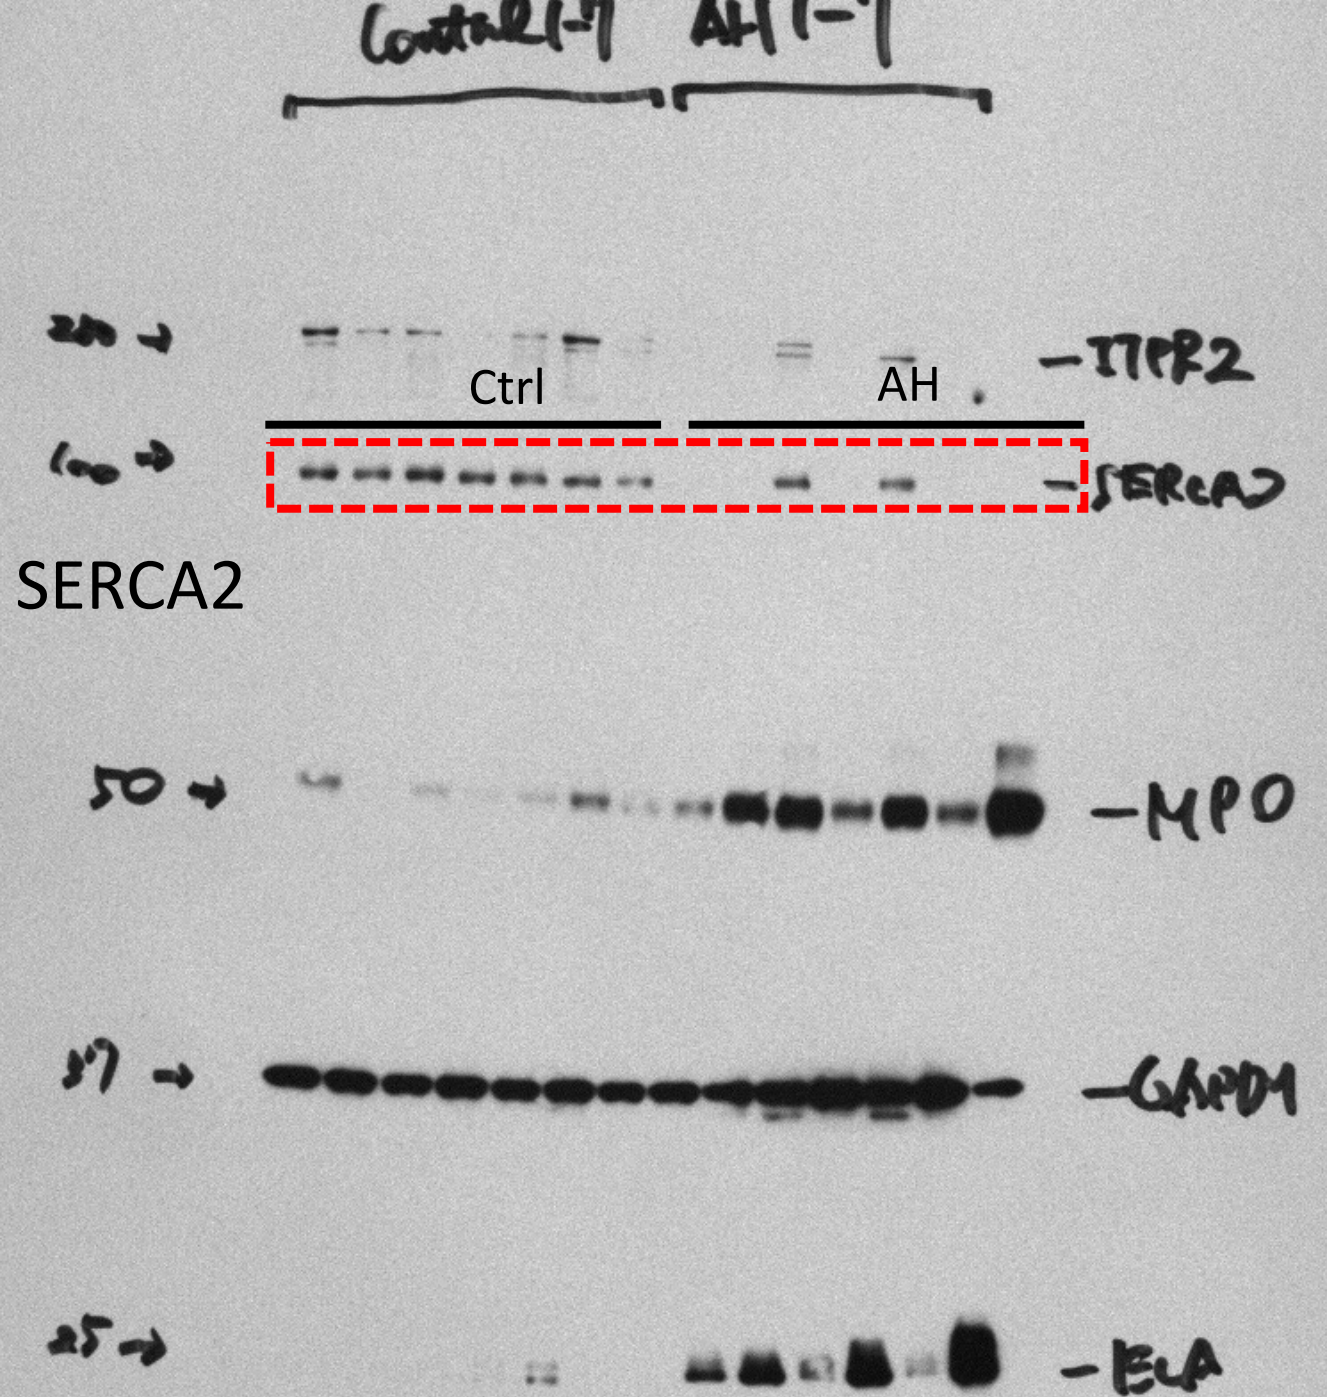

Full unedited blot  
for Figure 8

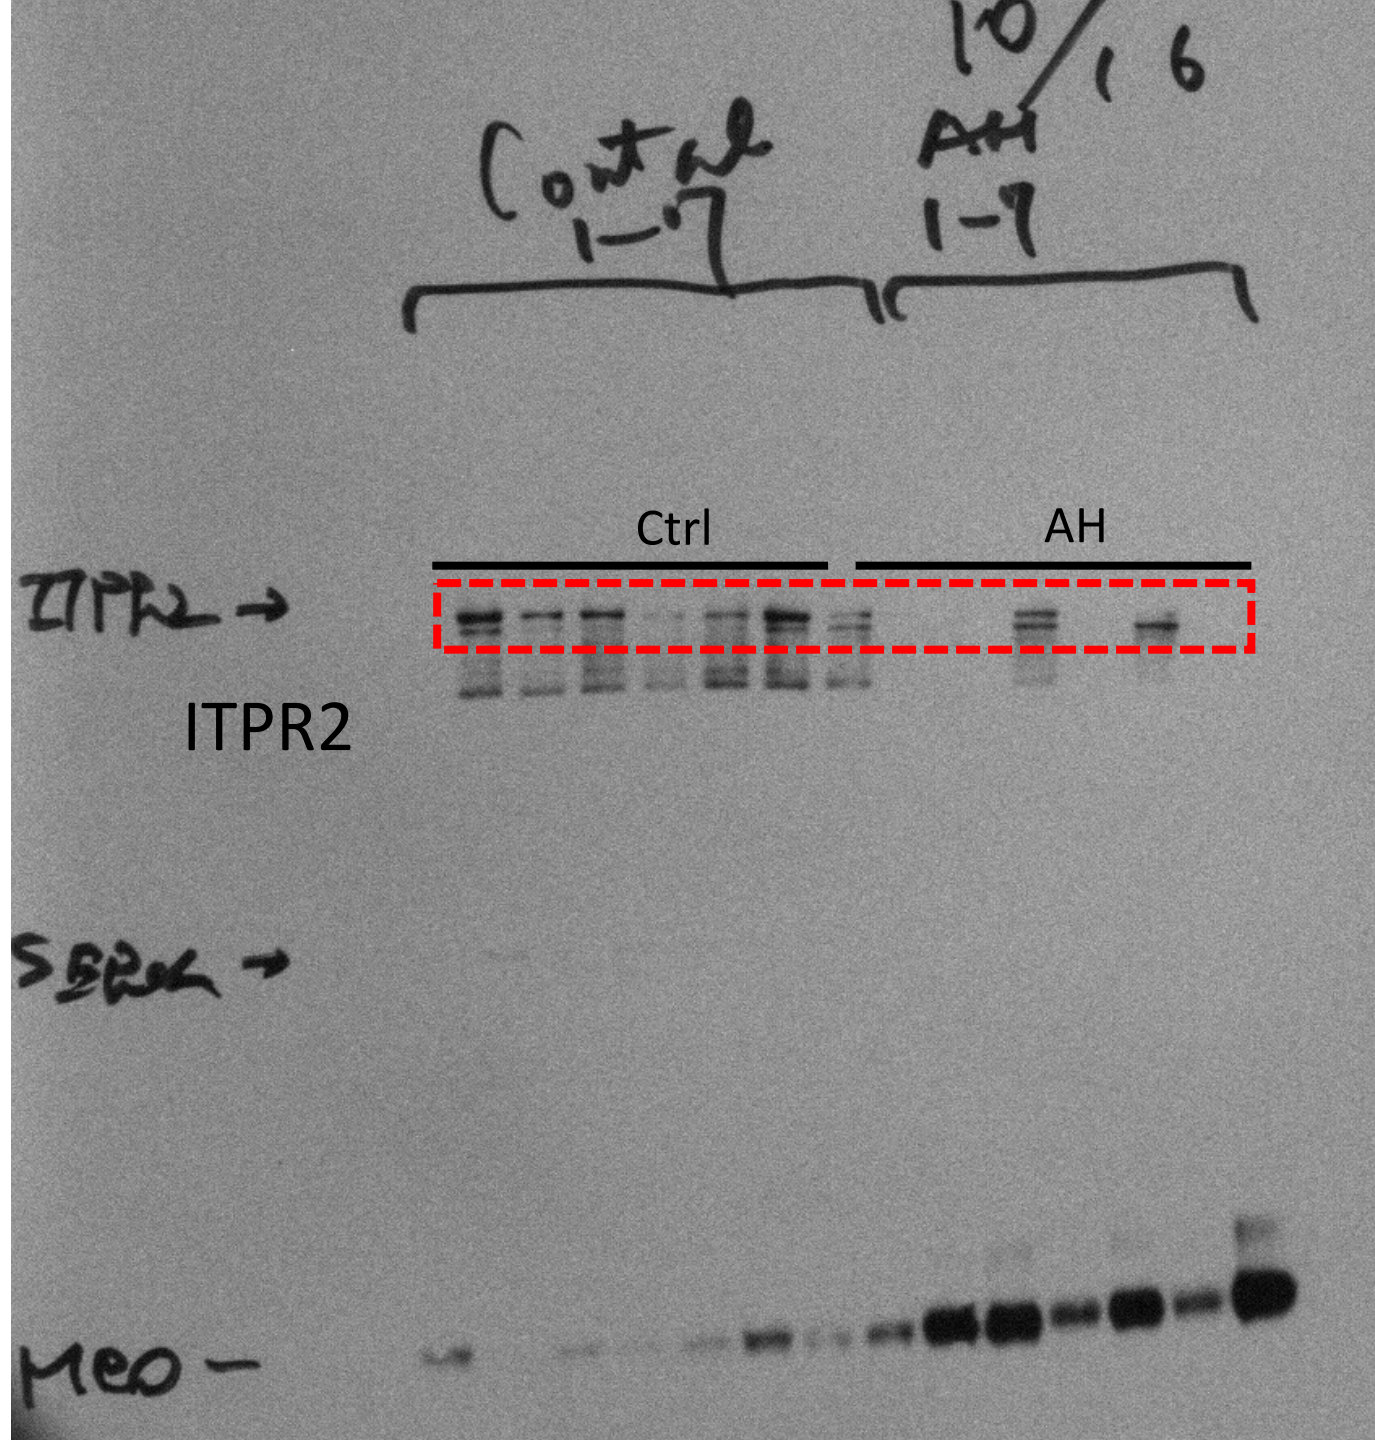

Full unedited blot  
for Figure S8I

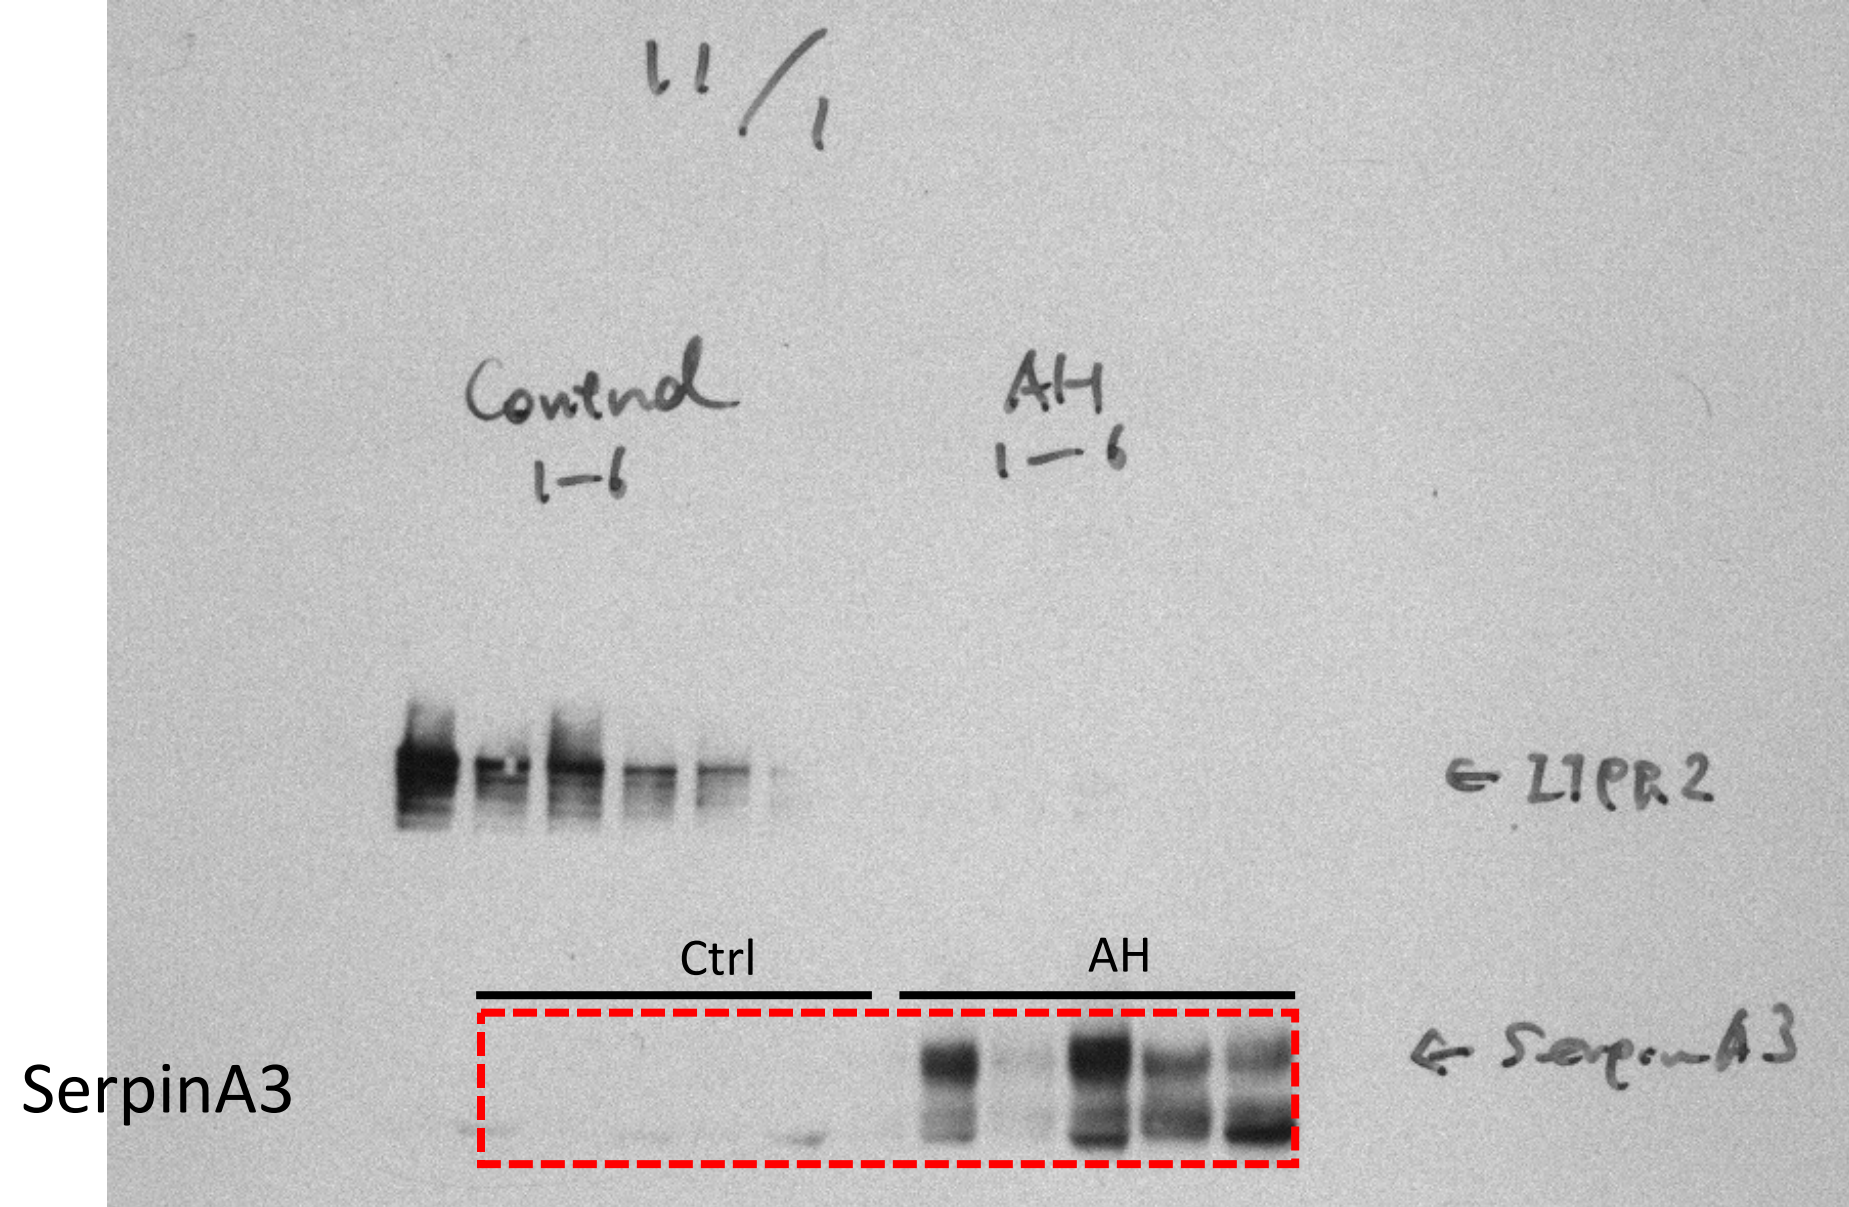



Full unedited blot  
for Figure S8I

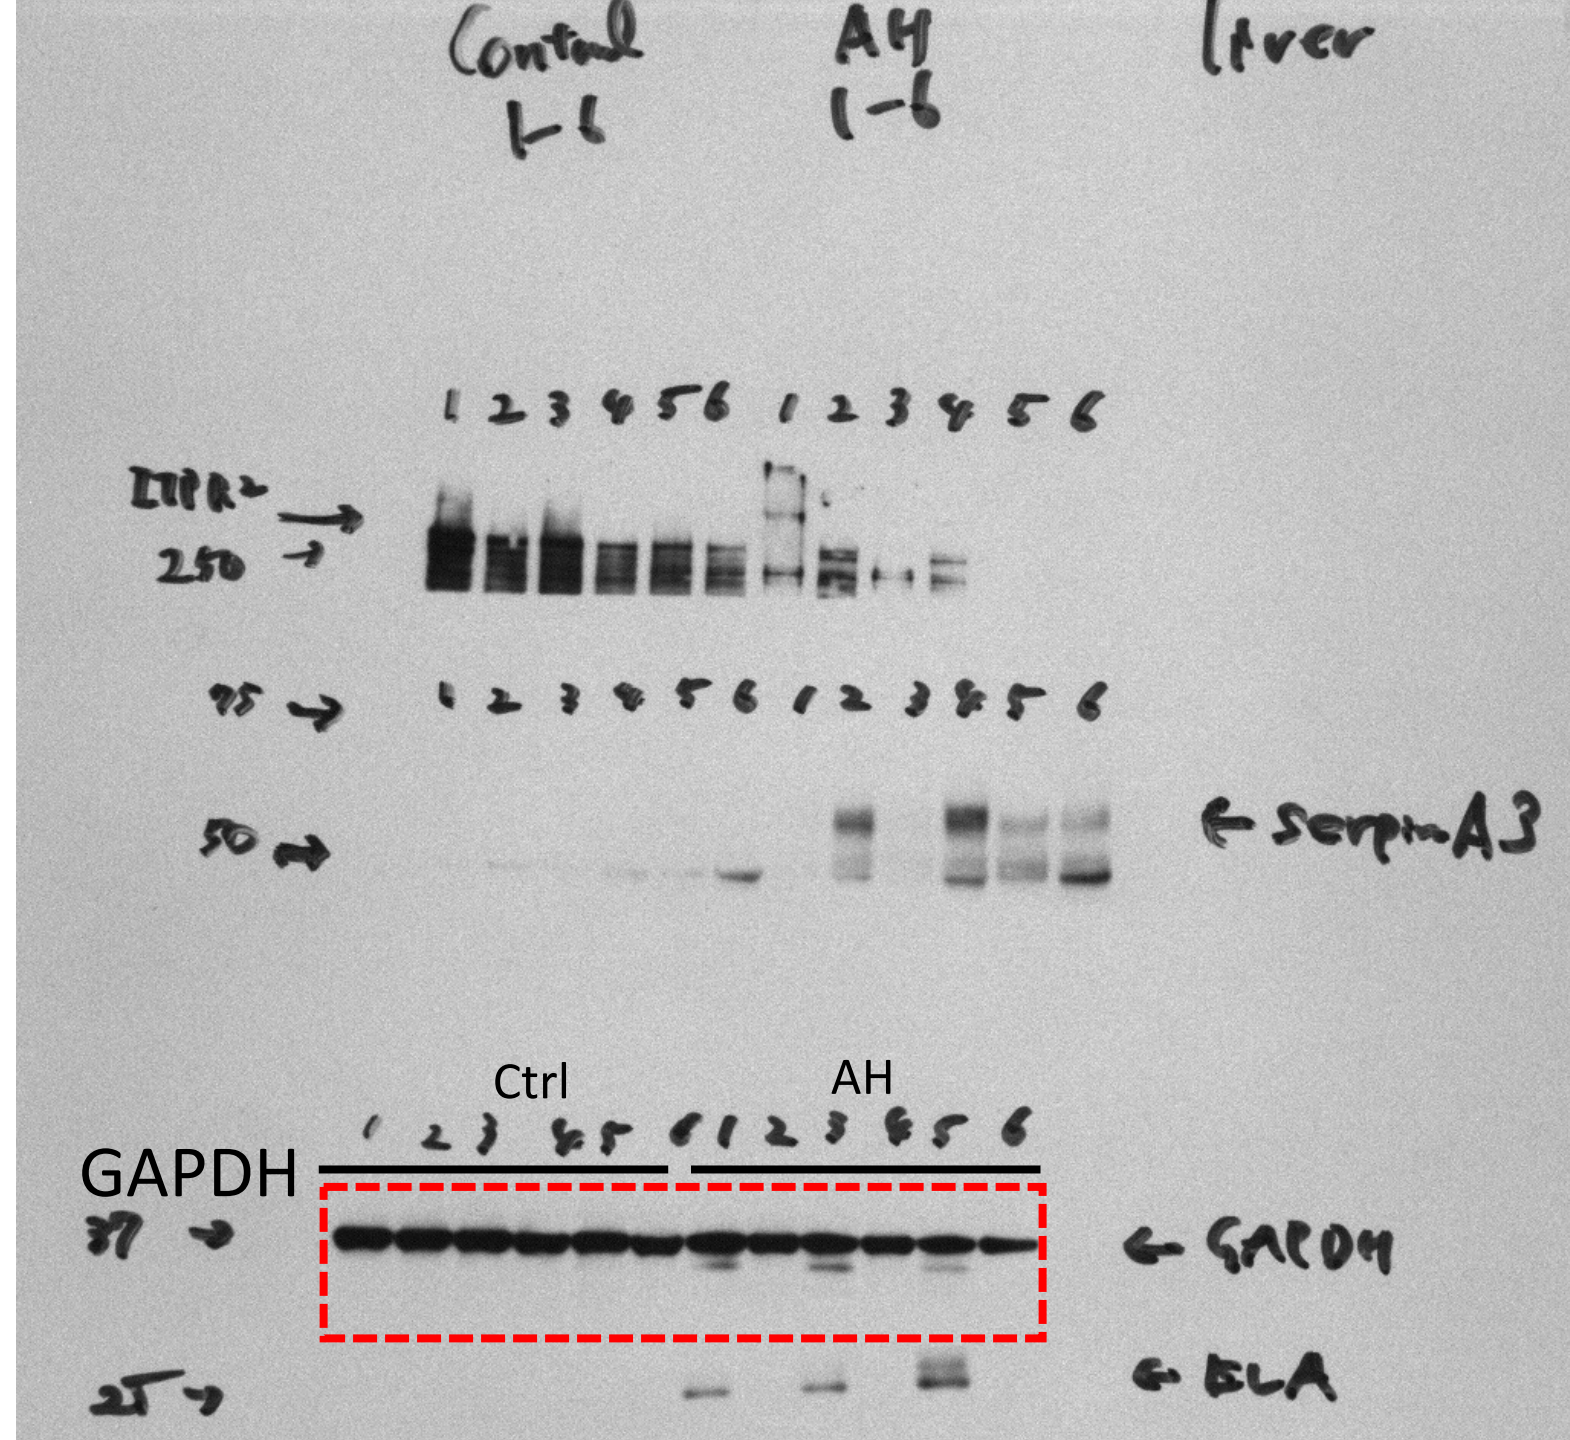

Full unedited blot  
for Figure 9A

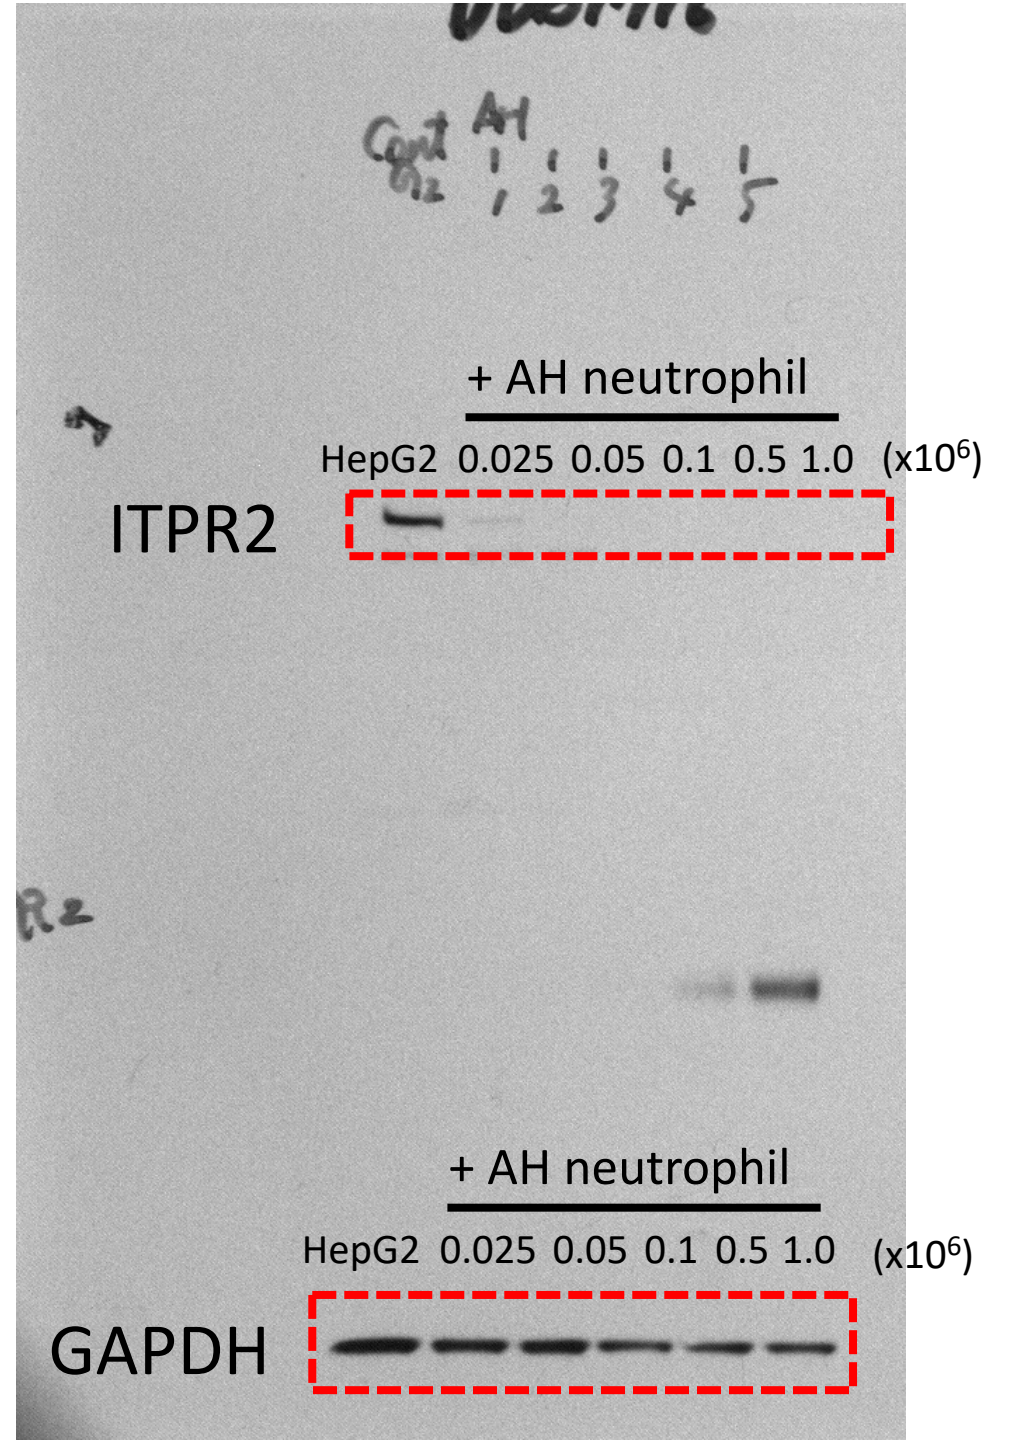

Full unedited blot  
for Figure 9B

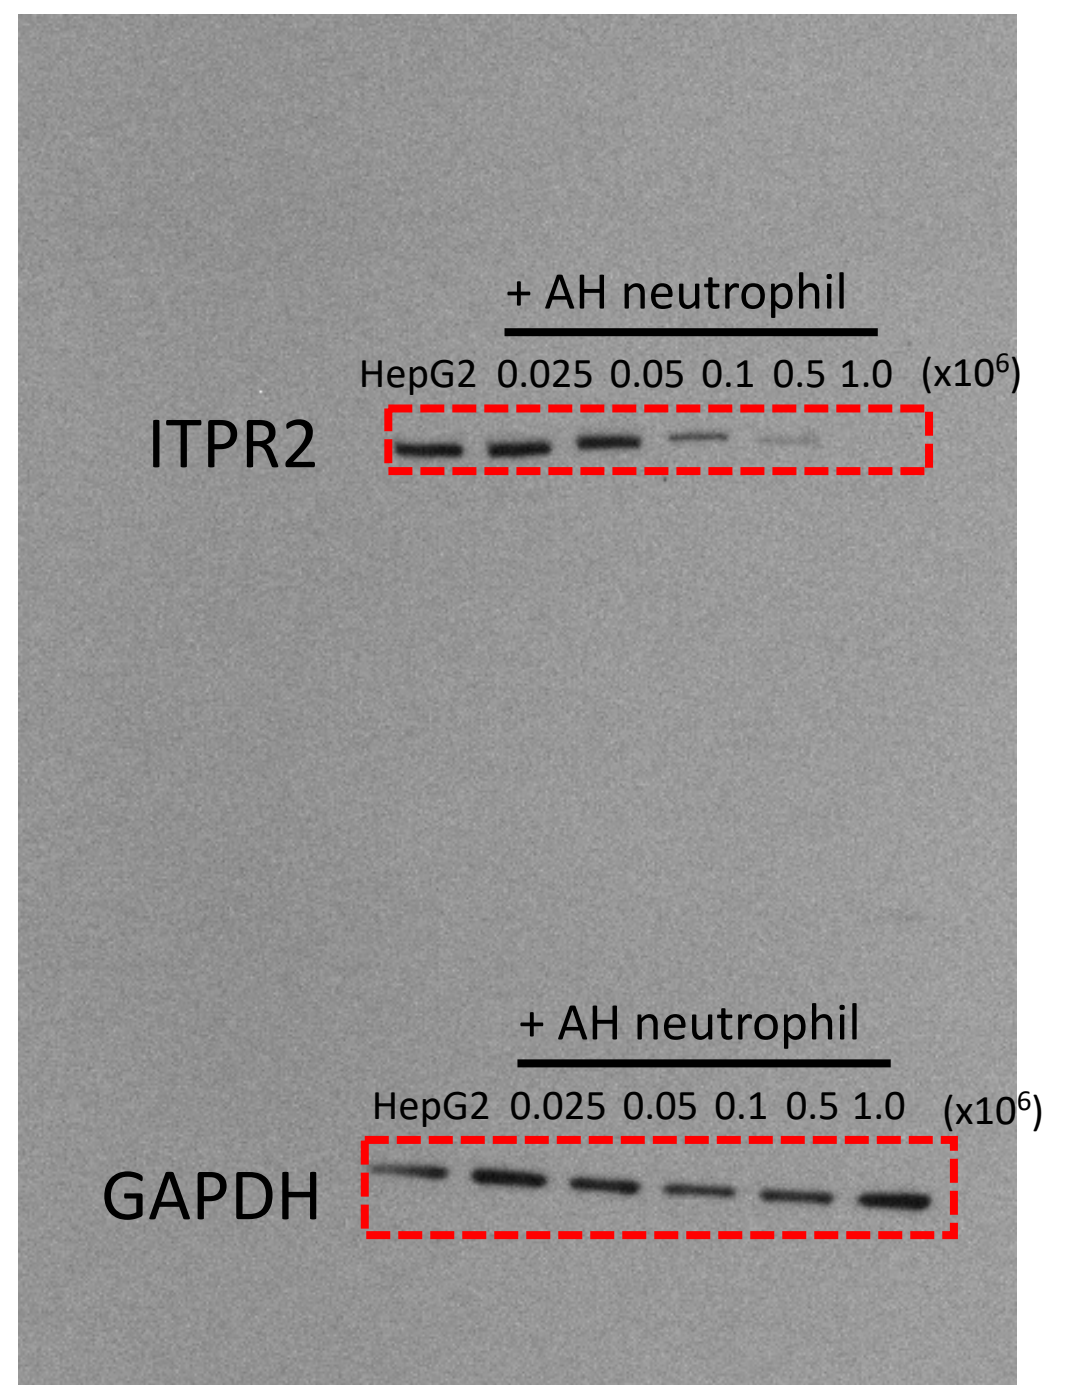

Full unedited blot  
for Figure 9H

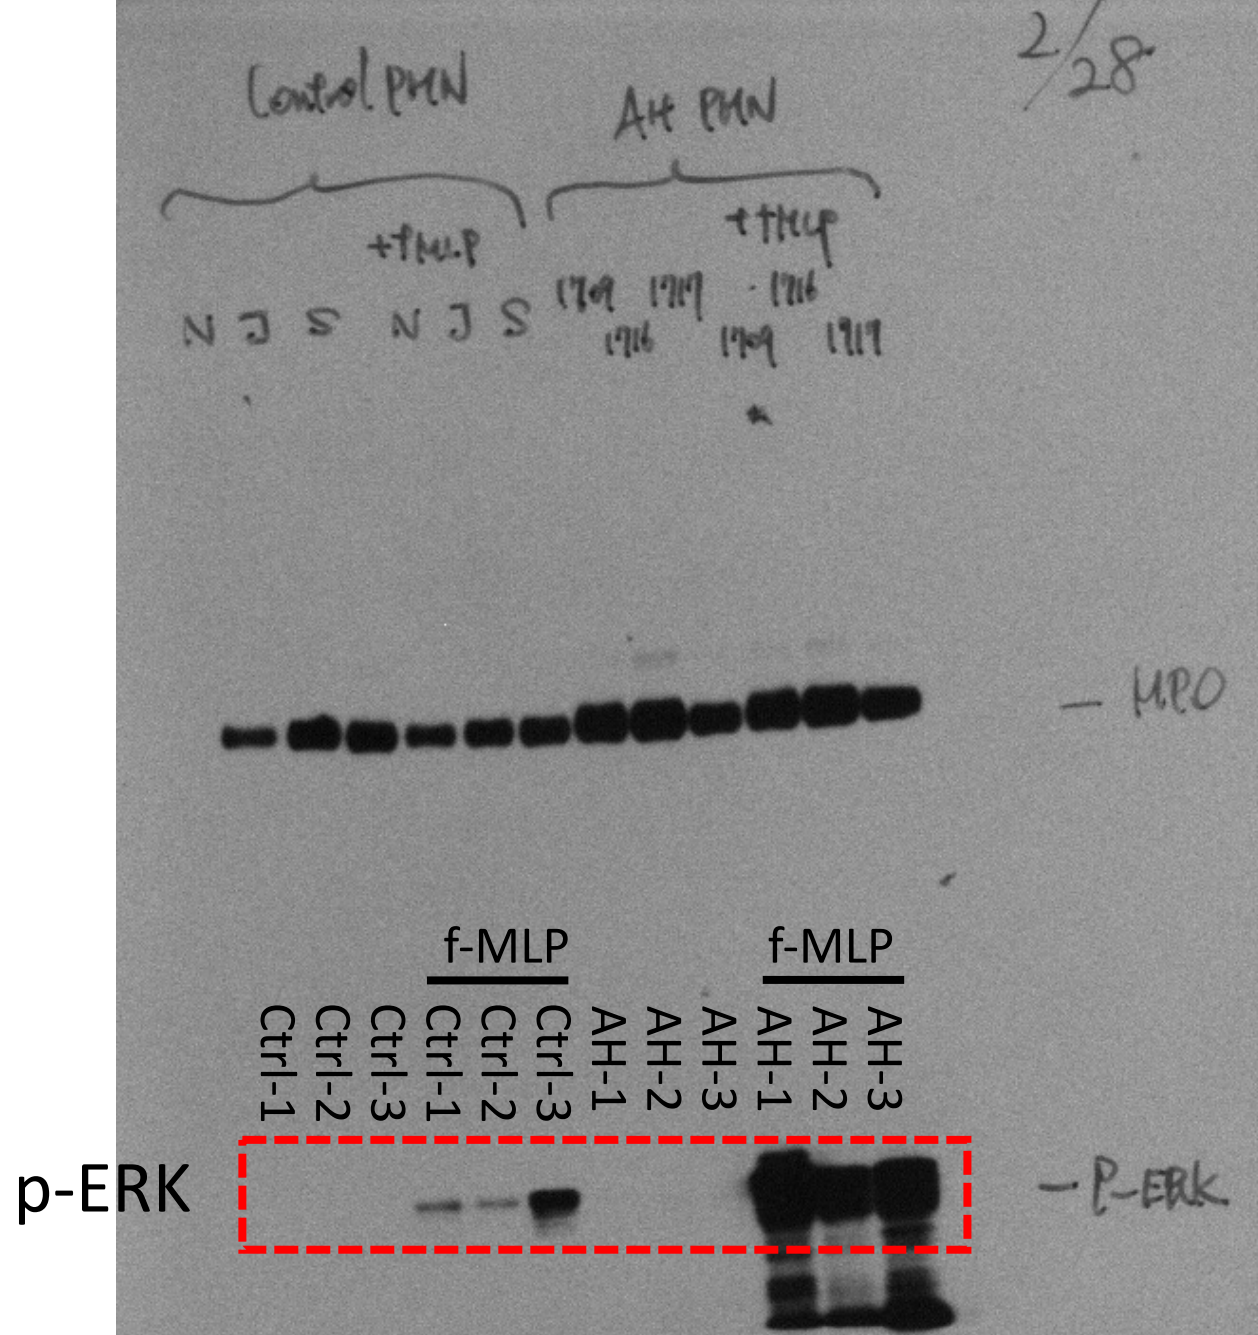

Full unedited blot  
for Figure 9H

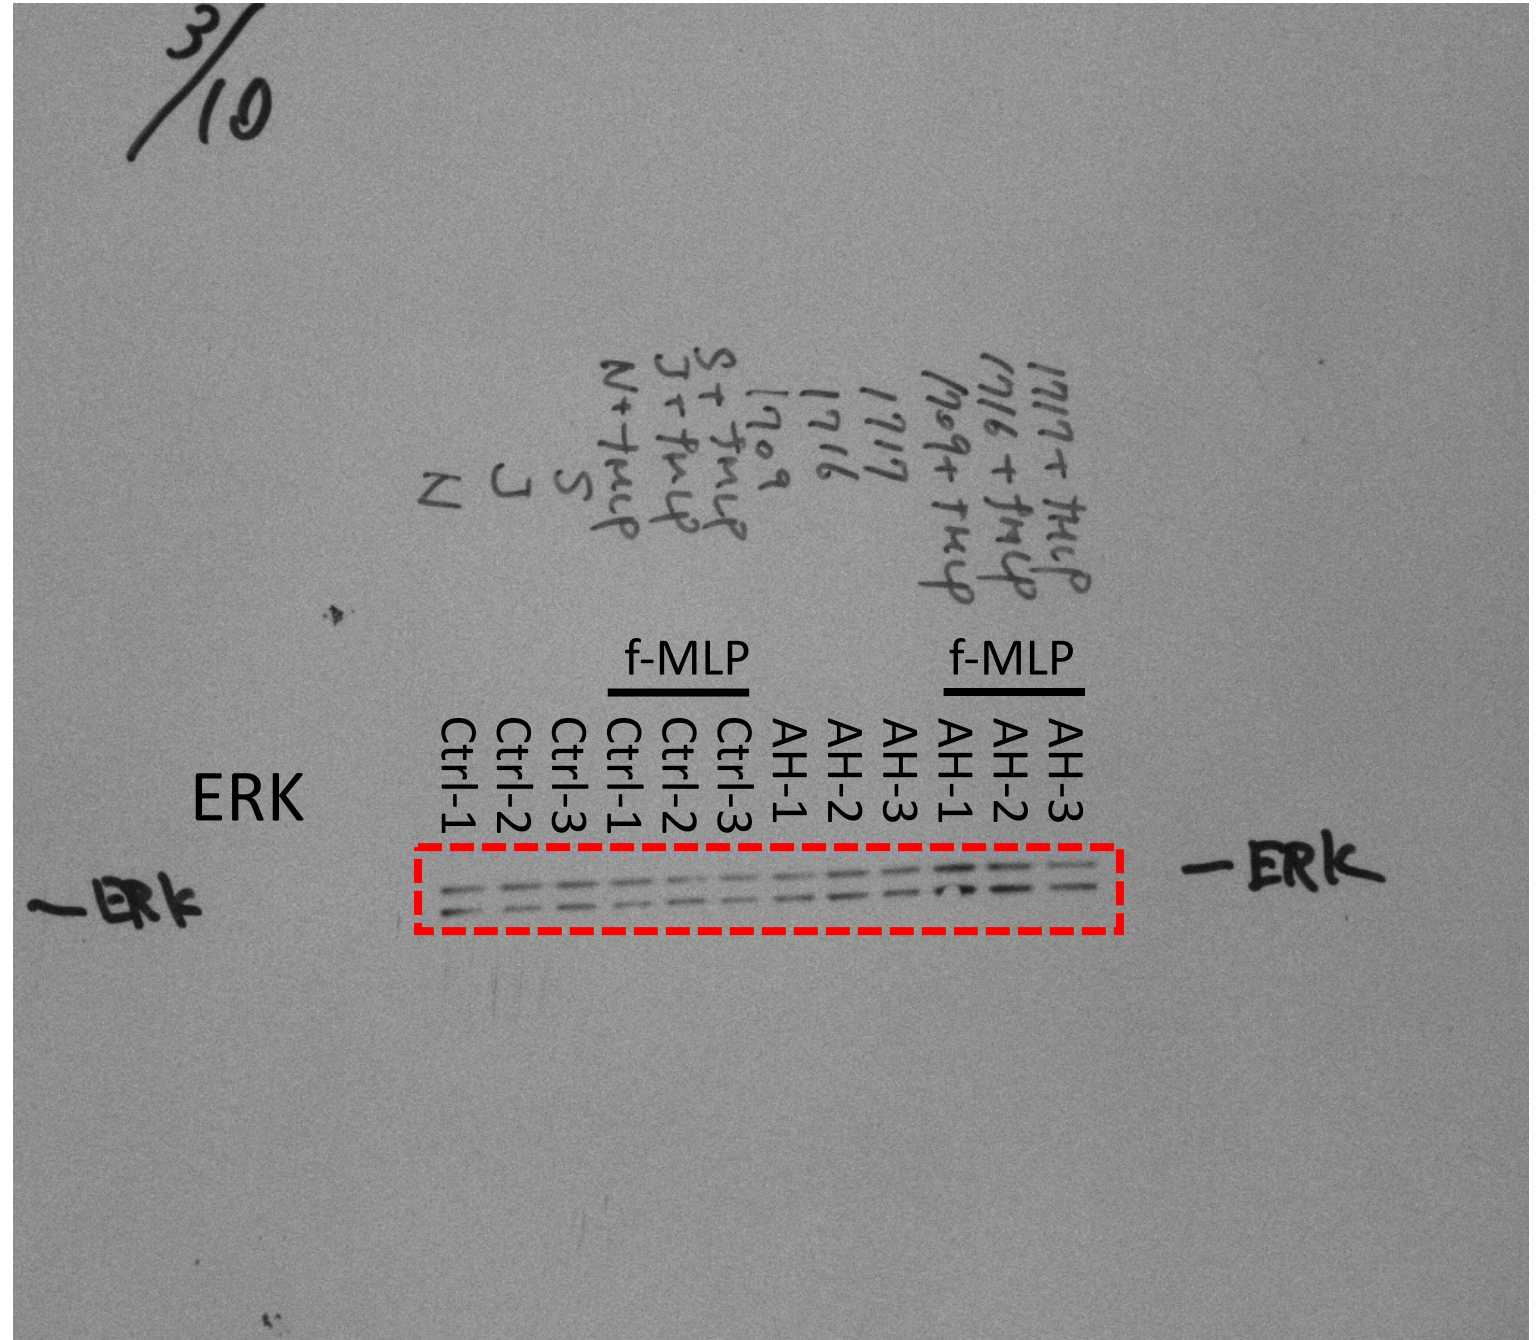

Full unedited blot  
for Figure 9E

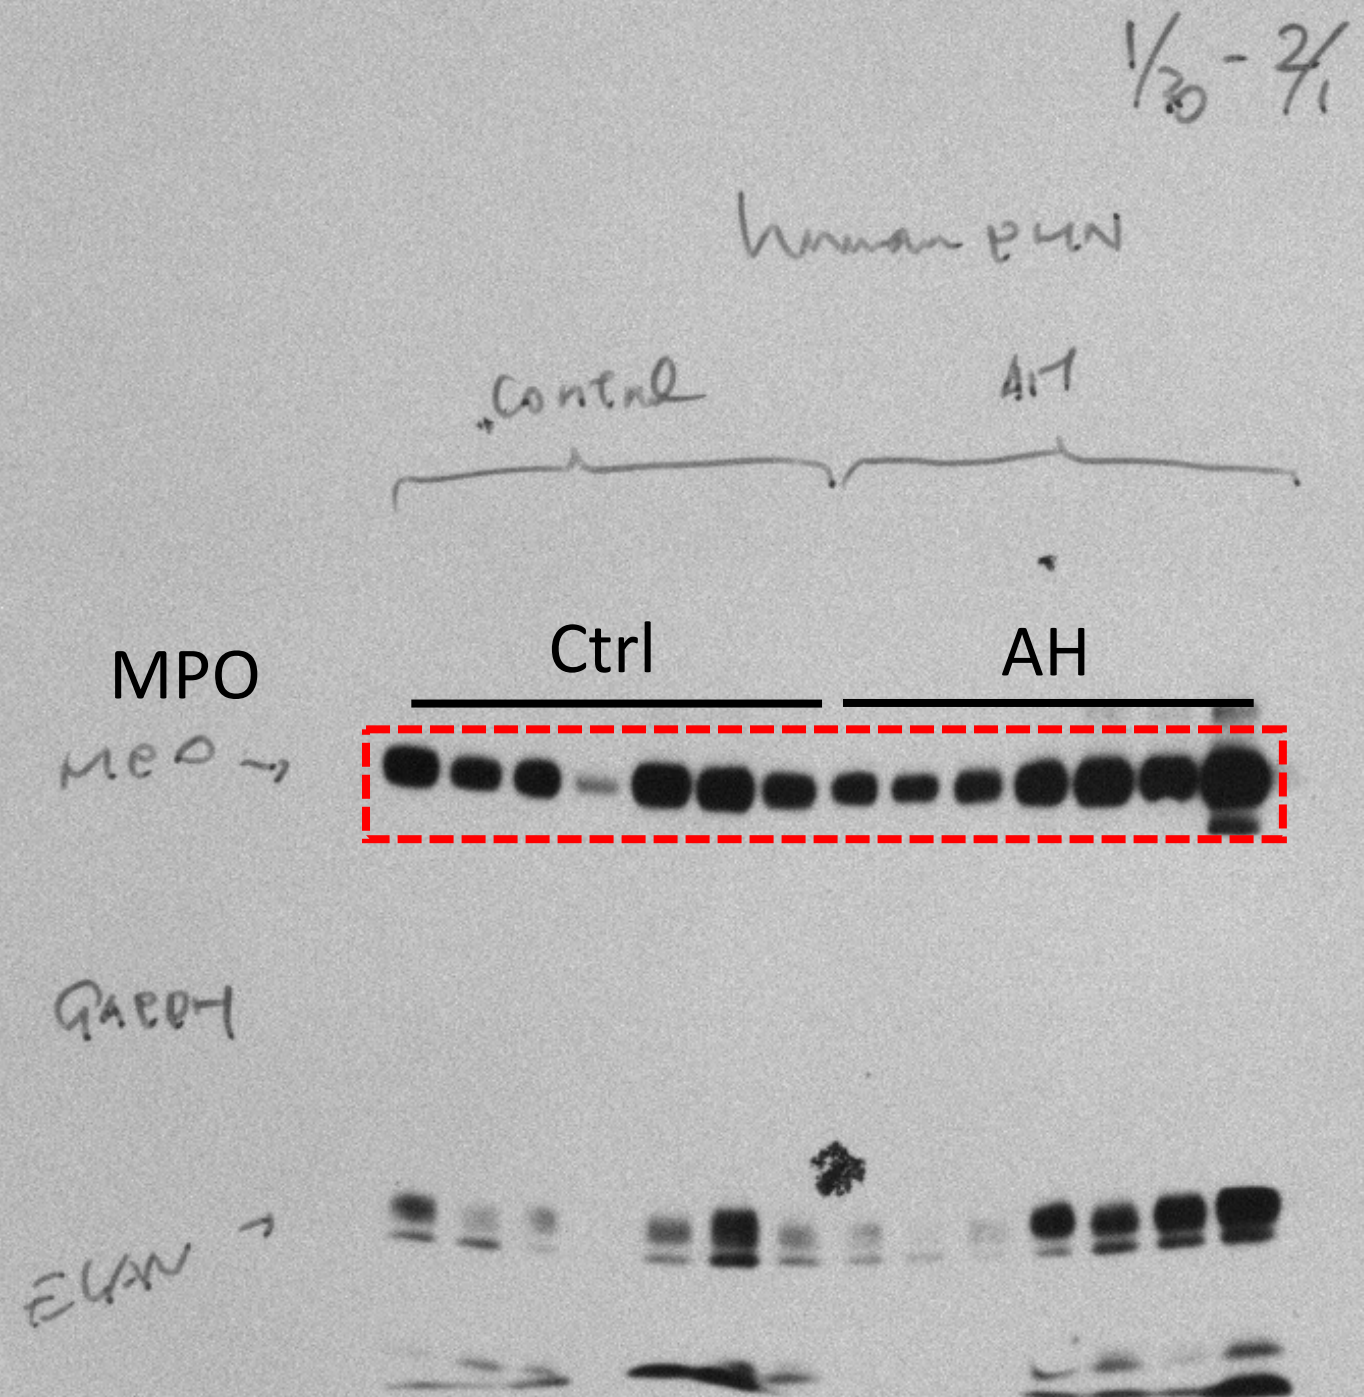

Full unedited blot  
for Figure 9E

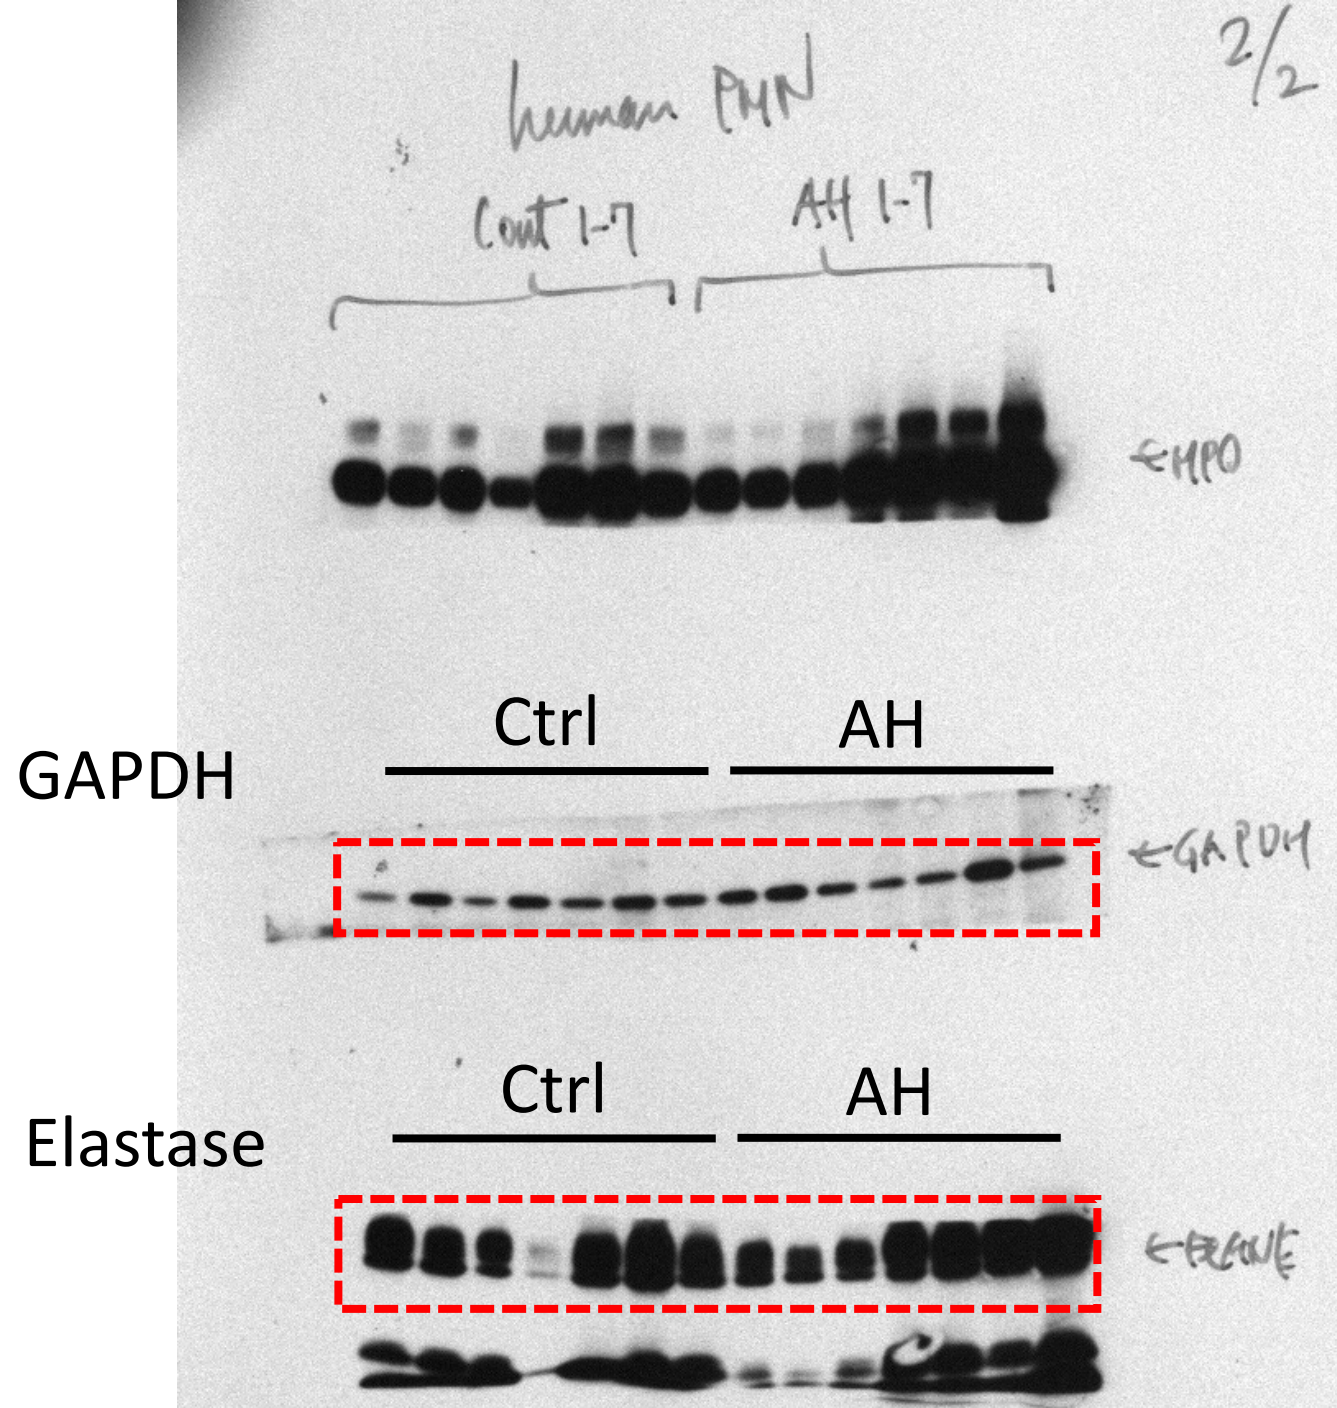

Supplement: sd2 [file 2]
